# Supplementary material for: Leveraging mouse chromatin data for heritability enrichment informs common disease architecture and reveals cortical layer contributions to schizophrenia
Source: PubMed Central journal article supplement — Genome Res. 2020 Apr;30(4):528–39. doi: 10.1101/gr.256578.119 (PMC7197474; doi:10.1101/gr.256578.119), 2020-04
Supplement: supp_gr.256578.119_Supplemental_Fig_S1.pdf [file supp_gr.256578.119_Supplemental_Fig_S1.pdf]

# Supplemental Figure S1

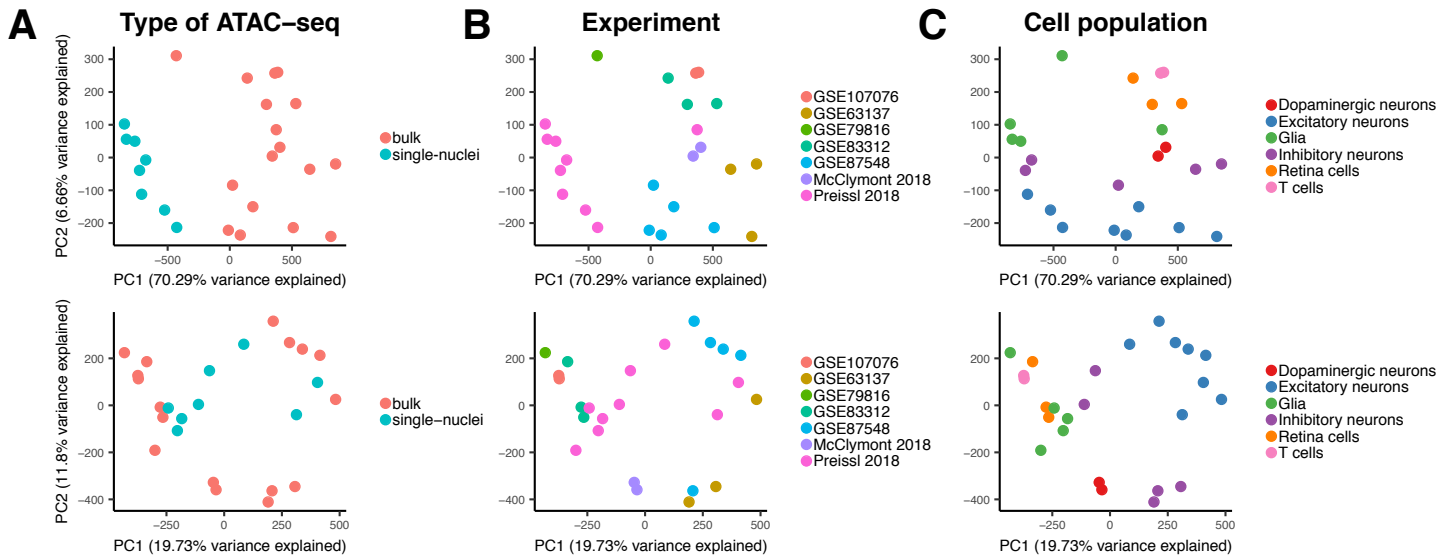

*Supplemental Figure S1.* Summary of principal component analysis of ATAC-seq cell population peak read counts. A, B, C) PC1 vs. PC2 for log<sub>2</sub> (counts + 1) (top) and quantile normalized and batch corrected log<sub>2</sub> (counts + 1) (bottom). A) Cell populations are colored according to type of ATAC-seq performed (“bulk” or “single-nuclei”), B) by experiment from which they came, and C) by broad cell population category. All meta-information can be found in Supplementary Table S1.
