# Supplementary material for: Leveraging mouse chromatin data for heritability enrichment informs common disease architecture and reveals cortical layer contributions to schizophrenia
Source: PubMed Central journal article supplement — Genome Res. 2020 Apr;30(4):528–39. doi: 10.1101/gr.256578.119 (PMC7197474; doi:10.1101/gr.256578.119), 2020-04
Supplement: supp_gr.256578.119_Supplemental_Fig_S3.pdf [file supp_gr.256578.119_Supplemental_Fig_S3.pdf]

# Supplemental Figure S3

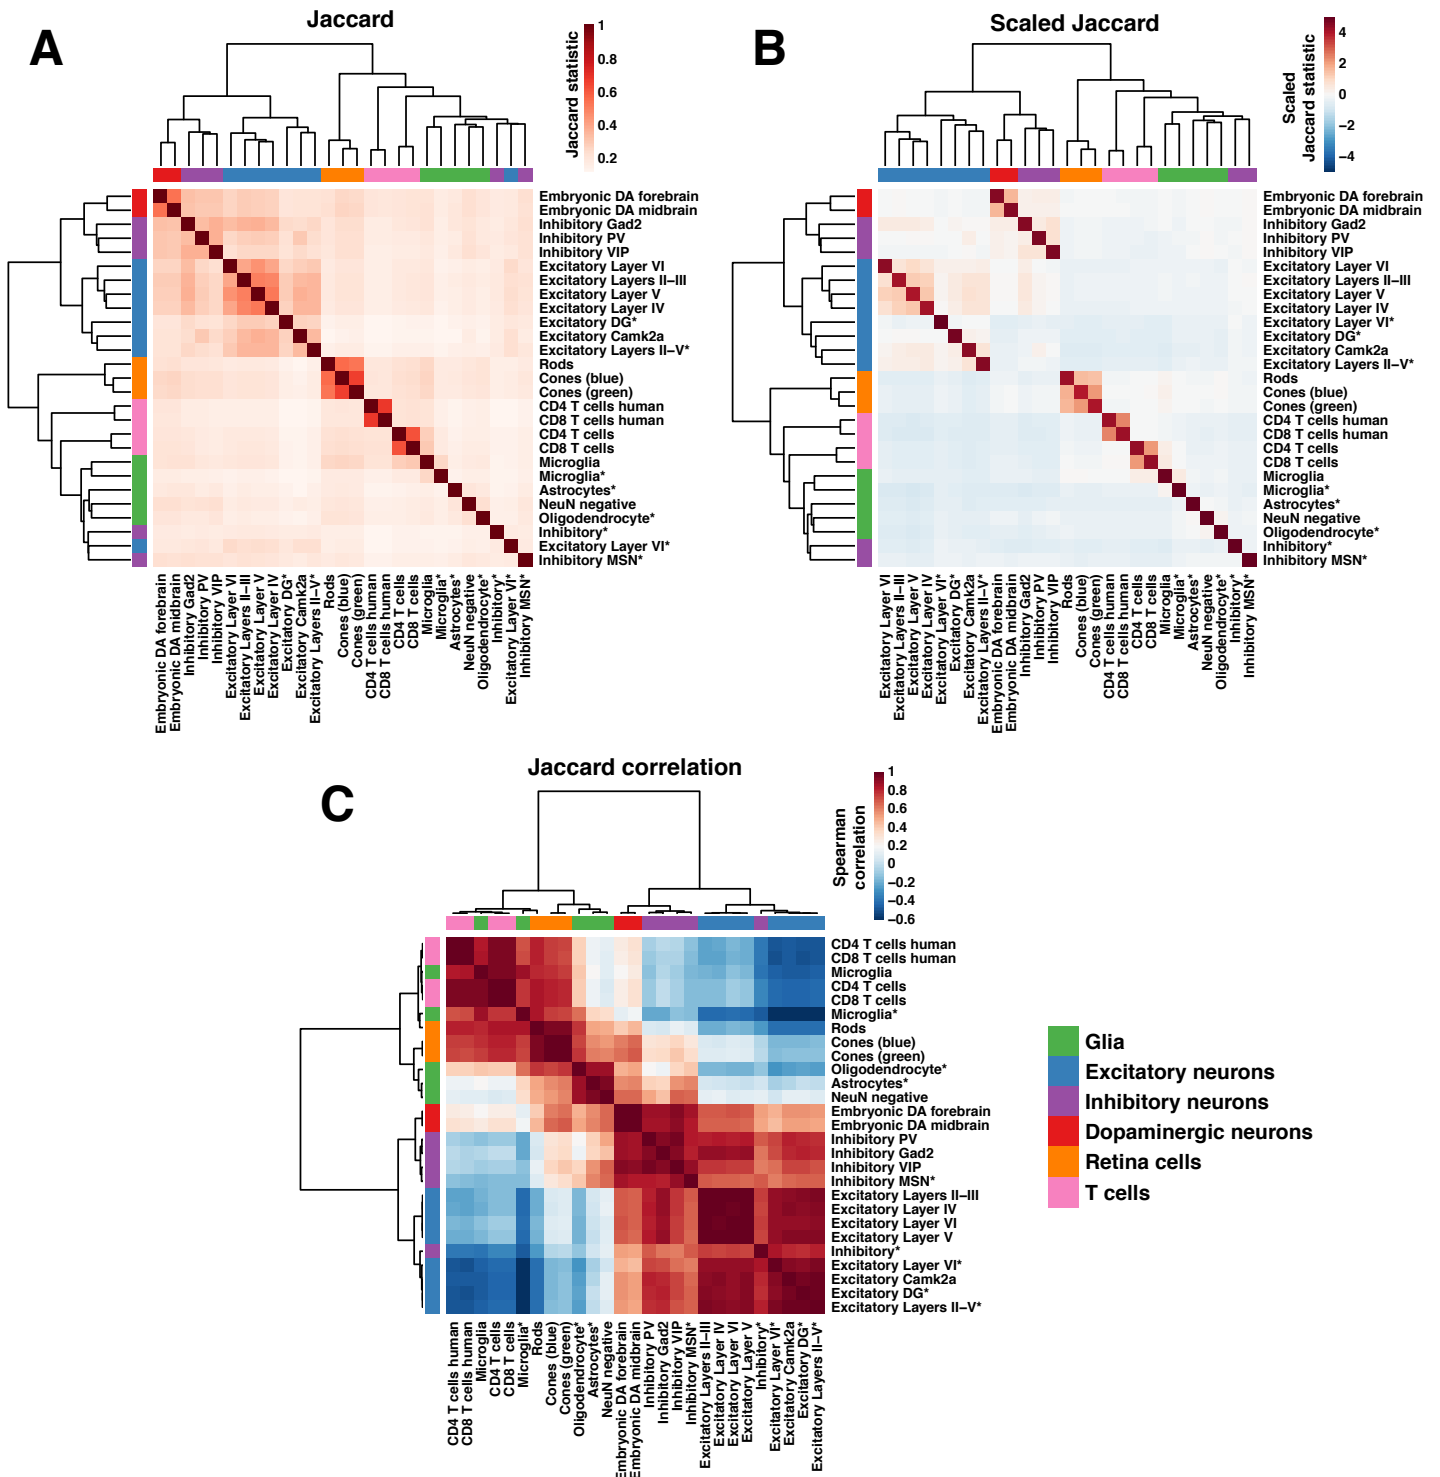

Supplemental Figure S3. Pairwise relationships between mouse-derived ATAC-seq human data. A) A heatmap displaying raw Jaccard statistics. B) A heatmap displaying pairwise Jaccard statistics scaled by column. C) A heatmap displaying the Spearman correlation for pairwise Jaccard statistics. All data is hierarchical clustered by both row and column.
