# Supplementary material for: Leveraging mouse chromatin data for heritability enrichment informs common disease architecture and reveals cortical layer contributions to schizophrenia
Source: PubMed Central journal article supplement — Genome Res. 2020 Apr;30(4):528–39. doi: 10.1101/gr.256578.119 (PMC7197474; doi:10.1101/gr.256578.119), 2020-04
Supplement: supp_gr.256578.119_Supplemental_Fig_S4.pdf [file supp_gr.256578.119_Supplemental_Fig_S4.pdf]

# Supplemental Figure S4

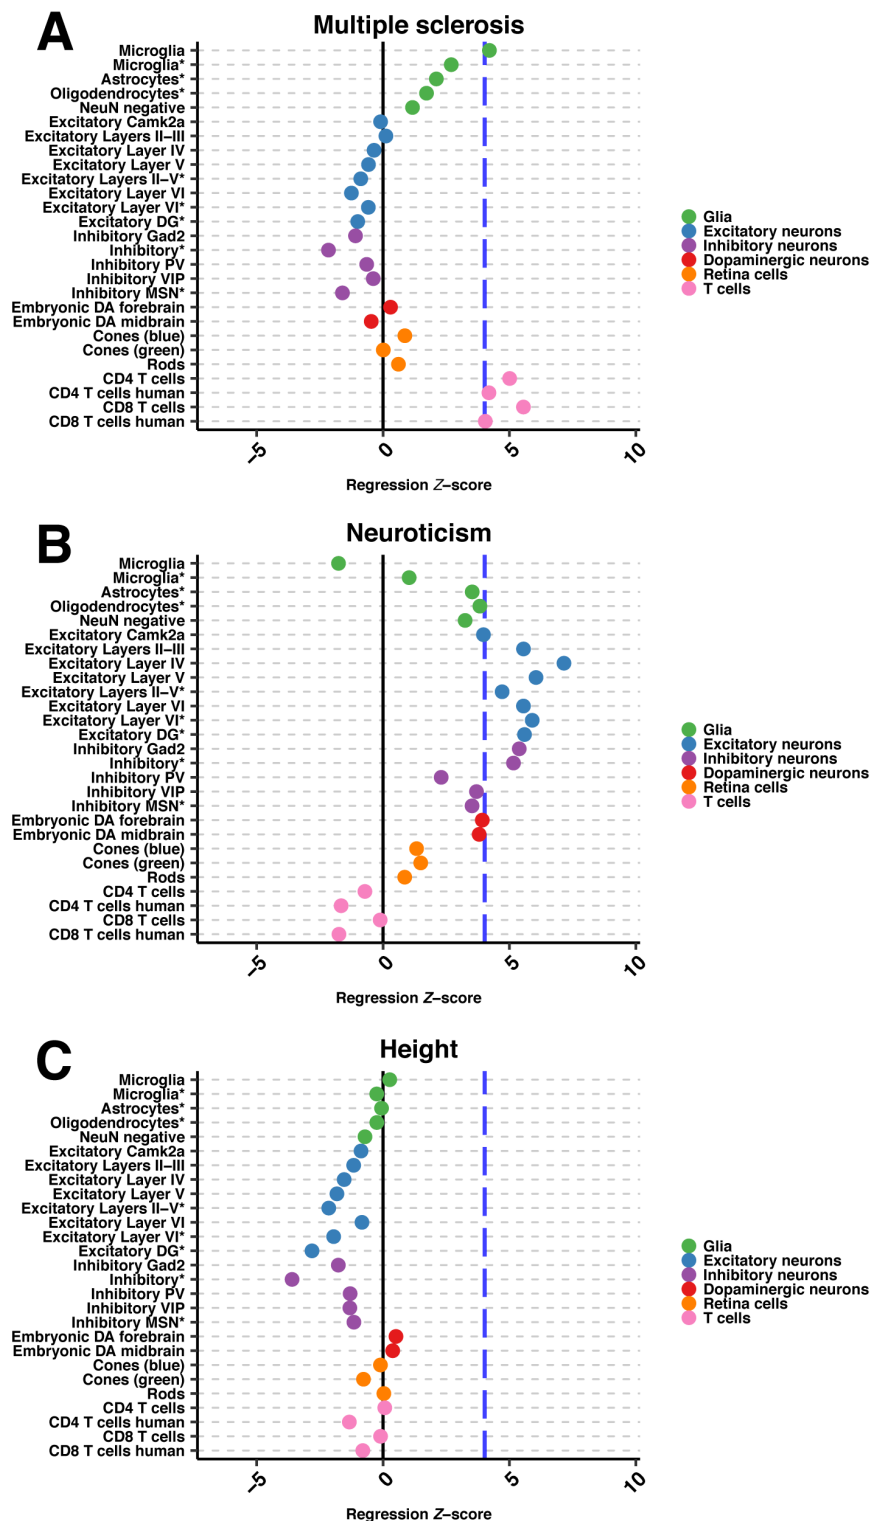

Supplemental Figure S4. Example dotplots displaying regression coefficient Z-scores from S-LDSC for GWAS indicative of the observed clustering groups. A) Multiple sclerosis, B) neuroticism and C) height. The across trait significance level is shown ( $Z\text{-score} = 4.02133$  which is equivalent to a  $-\log_{10}(\text{coefficient } p\text{-value}) = 4.53857$ ; blue dashed line). Populations are colored and ordered by broader cell-type category. Asterisks in the cell population name indicate single-nuclei ATAC-seq data. All results can be found in Supplemental Table S6.
