# Supplementary material for: Leveraging mouse chromatin data for heritability enrichment informs common disease architecture and reveals cortical layer contributions to schizophrenia
Source: PubMed Central journal article supplement — Genome Res. 2020 Apr;30(4):528–39. doi: 10.1101/gr.256578.119 (PMC7197474; doi:10.1101/gr.256578.119), 2020-04
Supplement: supp_gr.256578.119_Supplemental_Fig_S5.pdf [file supp_gr.256578.119_Supplemental_Fig_S5.pdf]

# Supplemental Figure S5

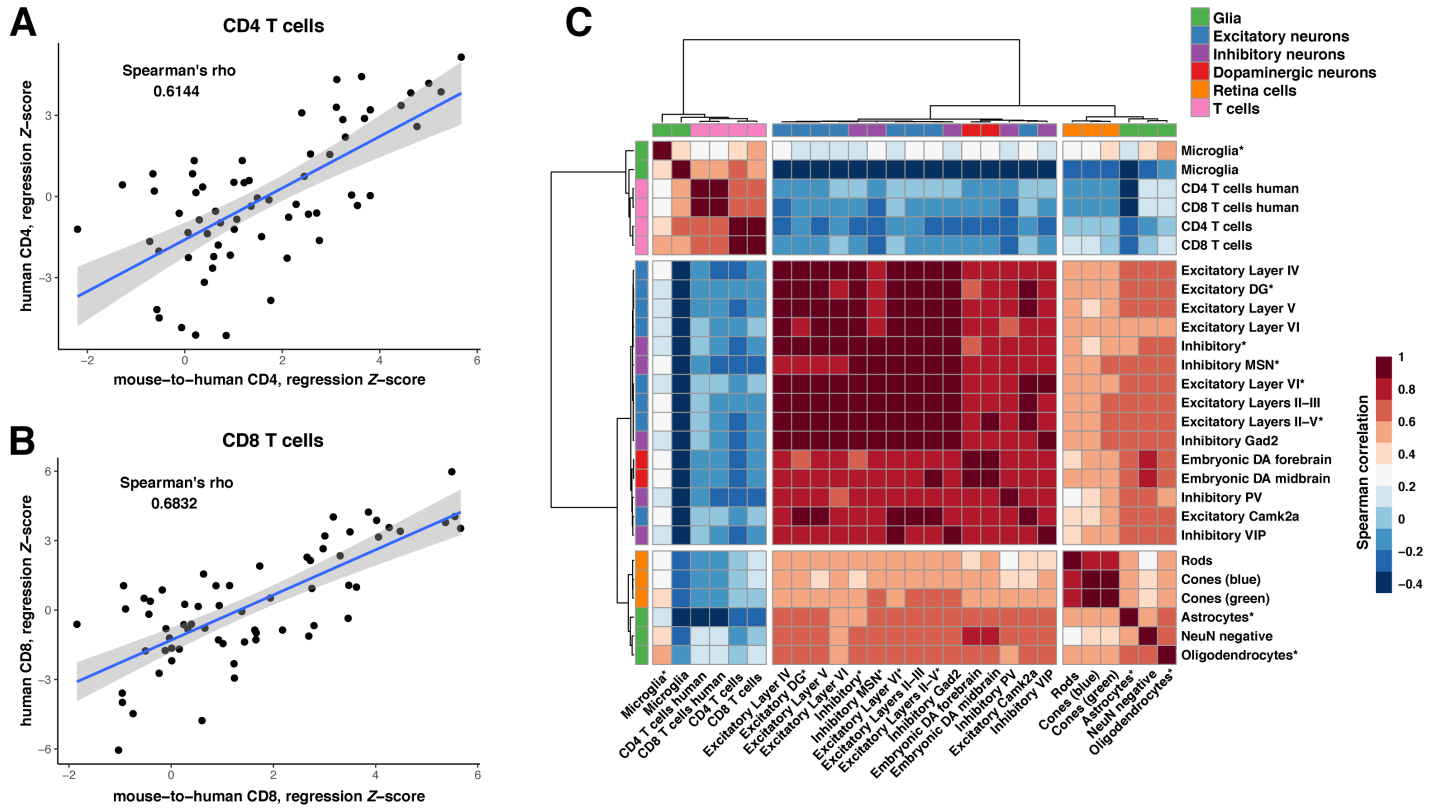

Supplemental Figure S5. S-LDSC results are correlated between mouse-derived human open chromatin profiles in the same broad cell category. A, B) Scatterplots of S-LDSC heritability regression coefficient Z-scores between orthologous cell populations of A) CD4 and B) CD8 T cells. Both plots show a linear model fit to the data with a 95% confidence interval. C) A heatmap displaying the Spearman correlation for S-LDSC regression coefficient Z-scores between mouse-derived human ATAC-seq cell populations. All data is hierarchical clustered by both row and column.
