# Supplementary material for: Leveraging mouse chromatin data for heritability enrichment informs common disease architecture and reveals cortical layer contributions to schizophrenia
Source: PubMed Central journal article supplement — Genome Res. 2020 Apr;30(4):528–39. doi: 10.1101/gr.256578.119 (PMC7197474; doi:10.1101/gr.256578.119), 2020-04
Supplement: supp_gr.256578.119_Supplemental_Fig_S6_.pdf [file supp_gr.256578.119_Supplemental_Fig_S6_.pdf]

# Supplemental Figure S6

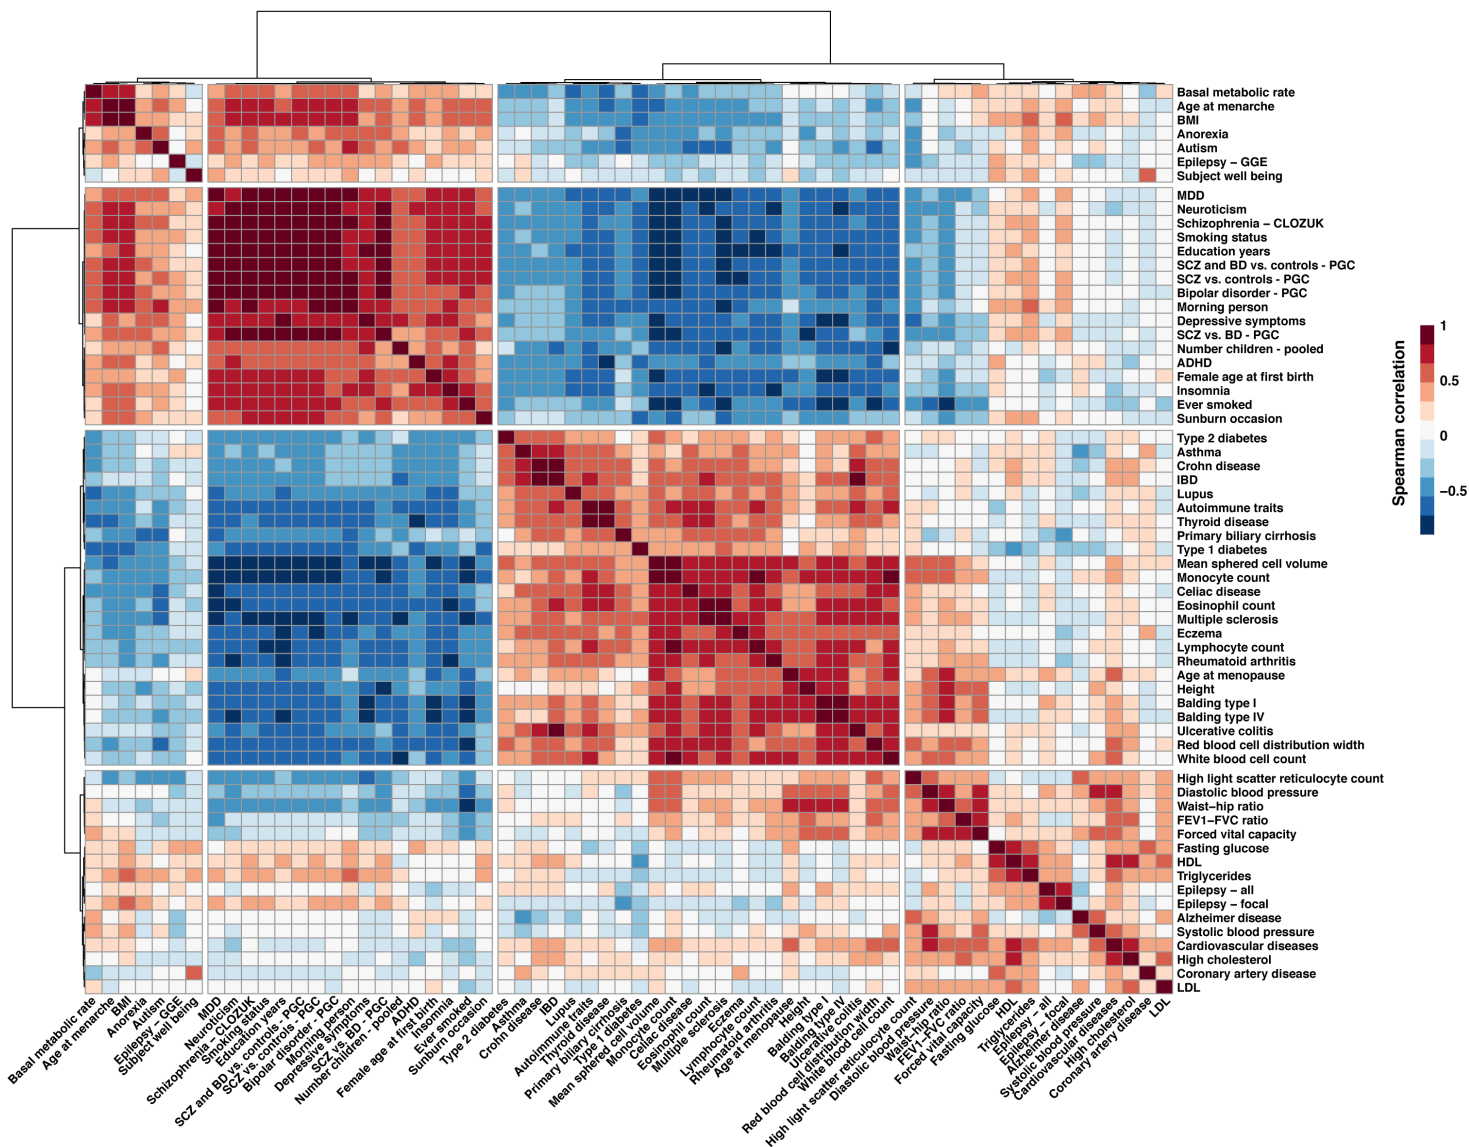

Supplemental Figure S6. S-LDSC results are correlated between similar traits. A heatmap displaying the Spearman correlation between GWAS traits for cell population S-LDSC regression coefficient Z-scores. All data is hierarchical clustered by both row and column.
