# Supplementary material for: Leveraging mouse chromatin data for heritability enrichment informs common disease architecture and reveals cortical layer contributions to schizophrenia
Source: PubMed Central journal article supplement — Genome Res. 2020 Apr;30(4):528–39. doi: 10.1101/gr.256578.119 (PMC7197474; doi:10.1101/gr.256578.119), 2020-04
Supplement: supp_gr.256578.119_Supplemental_Fig_S7.pdf [file supp_gr.256578.119_Supplemental_Fig_S7.pdf]

# Supplemental Figure S7

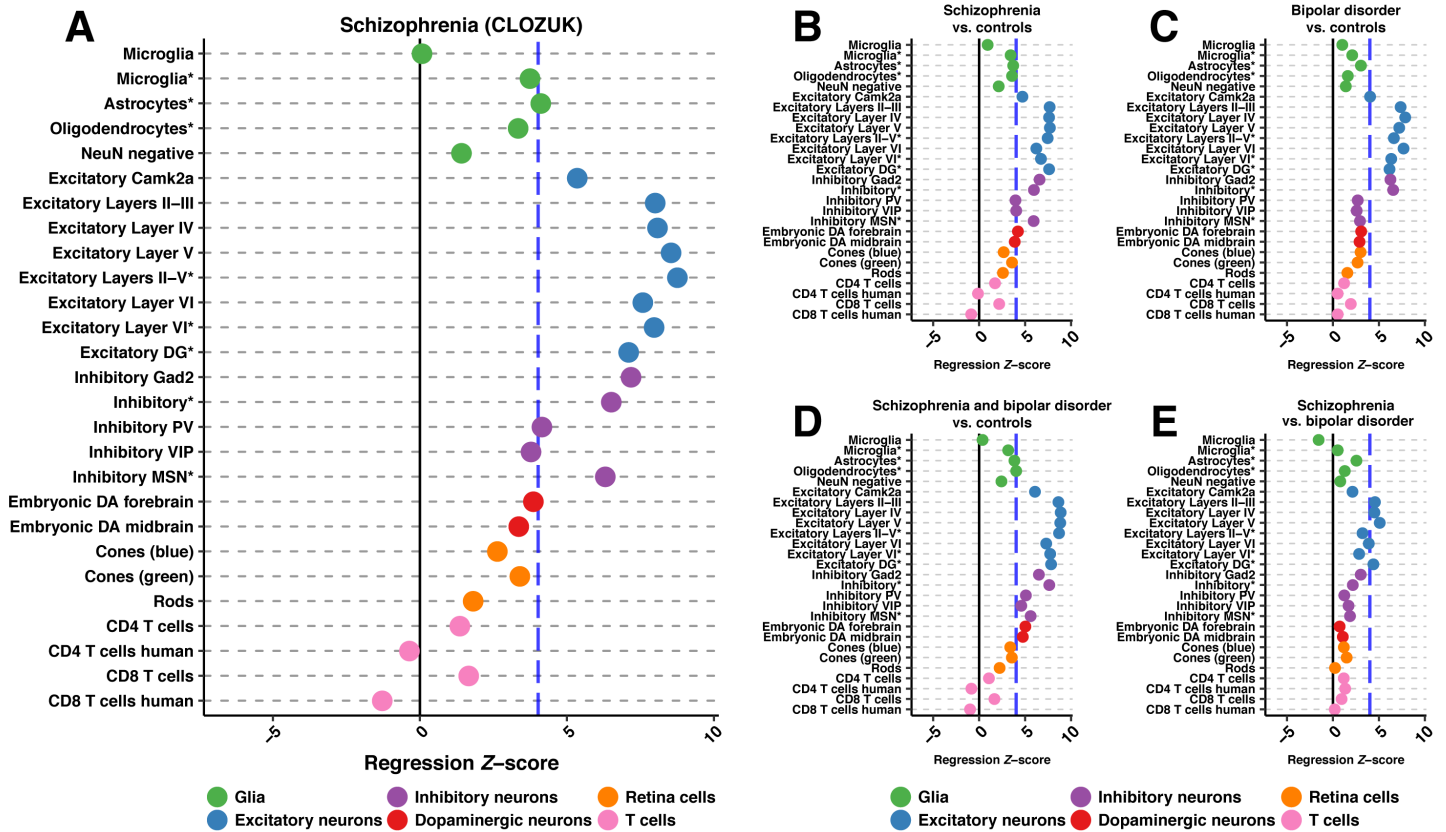

Supplemental Figure S7. S-LDSC results for CLOZUK and PGC schizophrenia studies as well as bipolar disorder GWAS. A, B, C, D, E) Dotplots displaying regression coefficient Z-scores for: A) CLOZUK schizophrenia GWAS, B) PGC schizophrenia GWAS, C) PGC bipolar disorder GWAS, D) schizophrenia and bipolar disorder GWAS and E) PGC schizophrenia versus bipolar disorder GWAS. Across trait significance levels are shown ( $Z\text{-score} = 4.02133$  which is equivalent to a  $-\log_{10}(\text{coefficient } p\text{-value}) = 4.53857$ ; blue dashed line). Populations are colored and ordered by broader cell-type category. Asterisks in the cell population name indicate single-nuclei ATAC-seq data. All results can be found in Supplemental Table 6.
