# Supplementary material for: Leveraging mouse chromatin data for heritability enrichment informs common disease architecture and reveals cortical layer contributions to schizophrenia
Source: PubMed Central journal article supplement — Genome Res. 2020 Apr;30(4):528–39. doi: 10.1101/gr.256578.119 (PMC7197474; doi:10.1101/gr.256578.119), 2020-04
Supplement: supp_gr.256578.119_Supplemental_Fig_S8.pdf [file supp_gr.256578.119_Supplemental_Fig_S8.pdf]

# Supplemental Figure S8

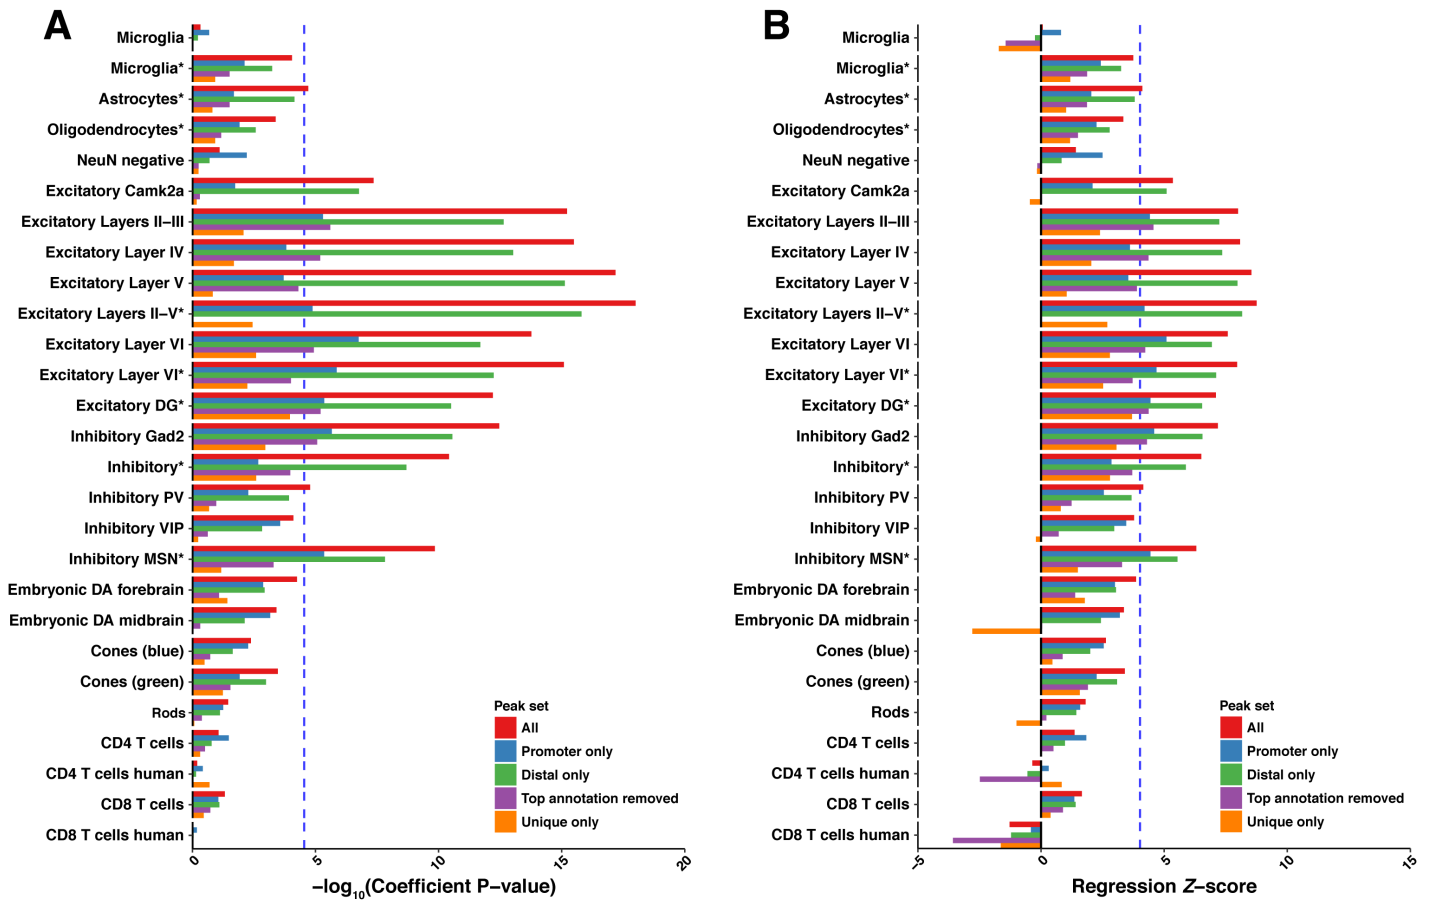

*Supplemental Figure S8.* CLOZUK SCZ S-LDSC results for all peaks, promoter peak sequences, distal peak sequences, peaks not in the top CLOZUK SCZ cell population, and peaks unique to each cell population. A) Barplots displaying  $-\log_{10}$  (heritability coefficient P-values). B) Barplots displaying regression coefficient Z-scores. Across trait significance level is shown ( $-\log_{10}(\text{coefficient p-value}) = 4.53857$  and equivalent Z-score = 4.02133; blue dashed line). Asterisks in the cell population name indicate single-nuclei ATAC-seq data. All results can be found in Supplemental Table 7.
