# Supplementary material for: Leveraging mouse chromatin data for heritability enrichment informs common disease architecture and reveals cortical layer contributions to schizophrenia
Source: PubMed Central journal article supplement — Genome Res. 2020 Apr;30(4):528–39. doi: 10.1101/gr.256578.119 (PMC7197474; doi:10.1101/gr.256578.119), 2020-04
Supplement: supp_gr.256578.119_Supplemental_Fig_S9.pdf [file supp_gr.256578.119_Supplemental_Fig_S9.pdf]

## Supplemental Figure S9

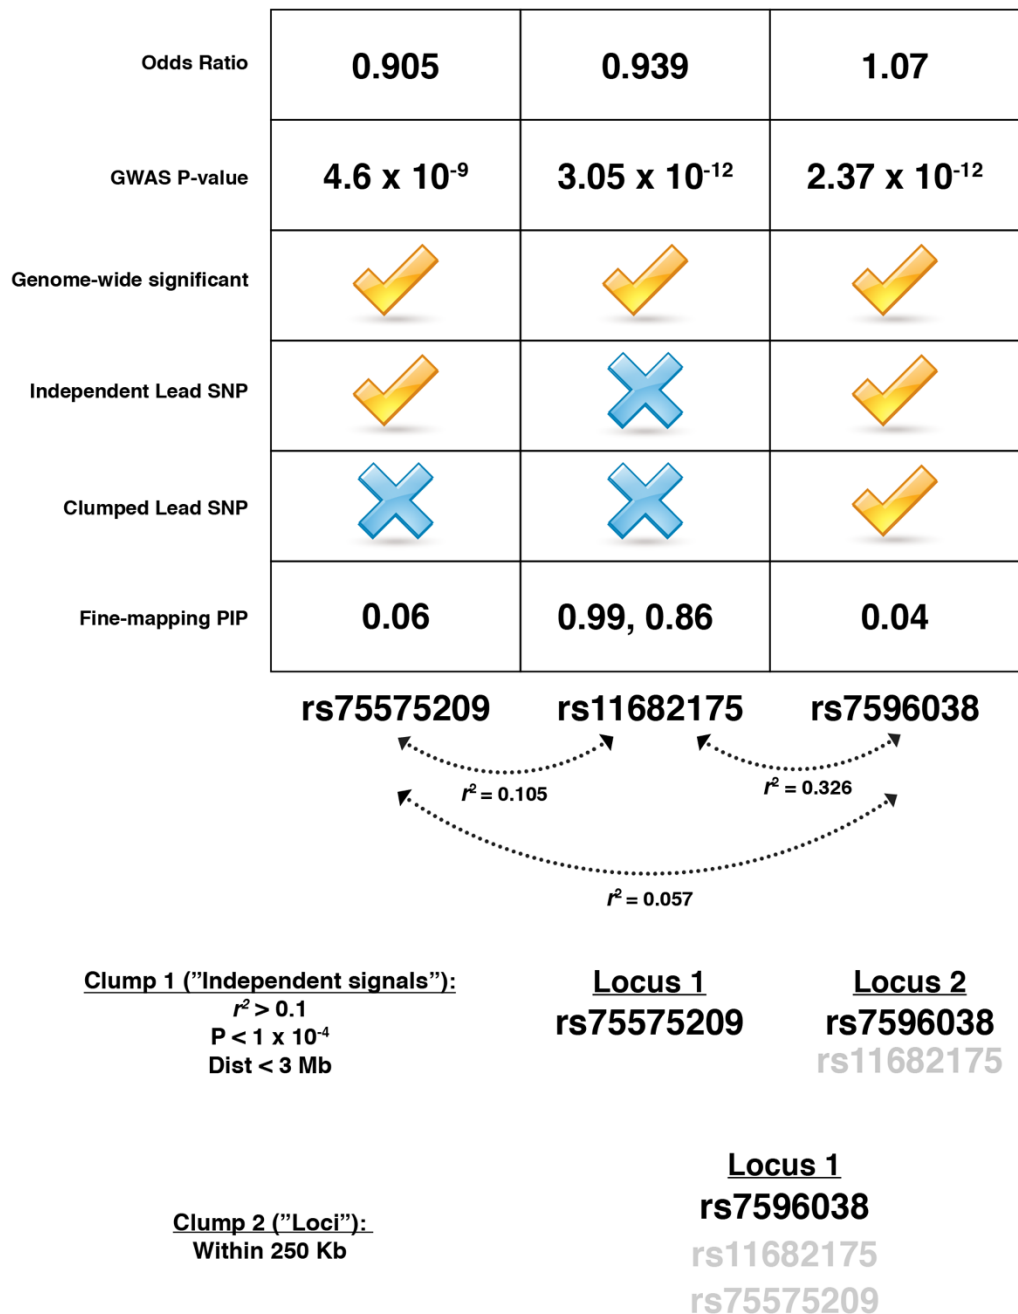

Supplemental Figure S9. rs11682175 is the top fine-mapped SNP in the rs75575209 and rs7596038 independent schizophrenia associated loci. Summary statistics ("Odds Ratio" and "GWAS P-value" are shown at the top of the figure for all three SNPs (rs11682175 and lead SNPs). The boxes below the summary statistics show a checkmark if the SNPs meet that criteria in Pardiñas *et al.* 2018. These criteria include whether the SNP was genome-wide significant in the original study, whether it was reported as an independent lead SNP, whether it was reported as a clumped lead SNP and what the fine-mapping posterior probabilities including annotations were for each SNP. Below the chart are the LD relationships between SNPs as calculated in 1000 Genomes European data (Phase 3). The bottom of the figure shows how the clumping procedures used in the original study lead to three genome-wide SNPs being combined into two independent lead SNPs and one reported locus.
