# Supplementary material for: Leveraging mouse chromatin data for heritability enrichment informs common disease architecture and reveals cortical layer contributions to schizophrenia
Source: PubMed Central journal article supplement — Genome Res. 2020 Apr;30(4):528–39. doi: 10.1101/gr.256578.119 (PMC7197474; doi:10.1101/gr.256578.119), 2020-04
Supplement: supp_gr.256578.119_Supplemental_Fig_S10.pdf [file supp_gr.256578.119_Supplemental_Fig_S10.pdf]

# Supplemental Figure S10

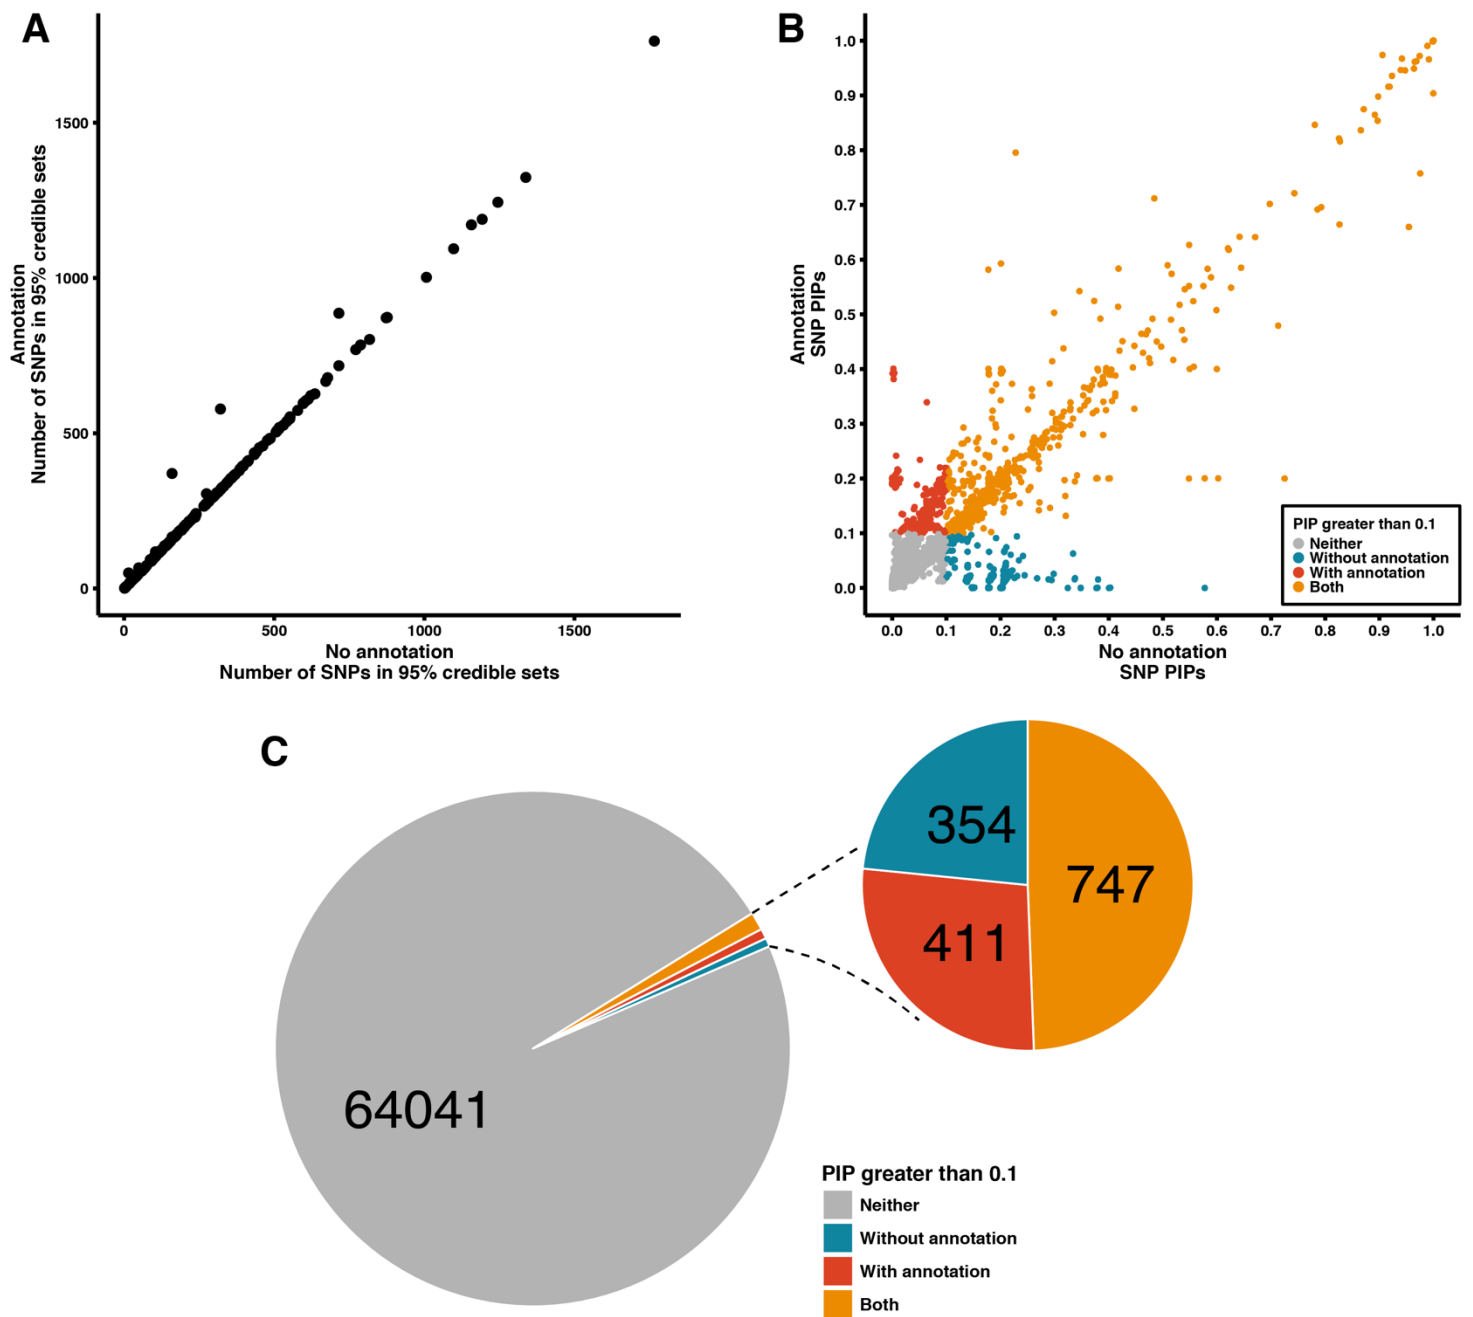

Supplemental Figure S10. A) Scatterplot comparing the number of SNPs falling in 95% credible sets in 177 SCZ loci. B) Scatterplot comparing the PIPs calculated with and without annotation for each SCZ SNP tested. SNPs with PIPs  $\geq 0.1$  are colored depending on which scenario the SNP reaches the threshold. C) Pie charts displaying the results seen in Supplemental Figure 10B.
