# Supplementary material for: Leveraging mouse chromatin data for heritability enrichment informs common disease architecture and reveals cortical layer contributions to schizophrenia
Source: PubMed Central journal article supplement — Genome Res. 2020 Apr;30(4):528–39. doi: 10.1101/gr.256578.119 (PMC7197474; doi:10.1101/gr.256578.119), 2020-04
Supplement: supp_gr.256578.119_Supplemental_Fig_S12.pdf [file supp_gr.256578.119_Supplemental_Fig_S12.pdf]

# Supplemental Figure S12

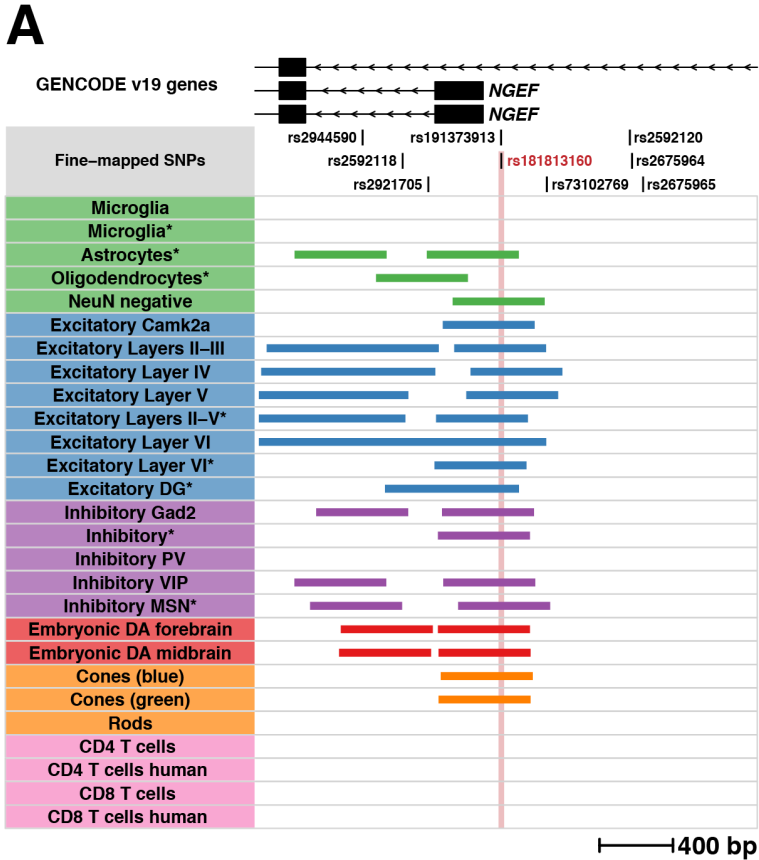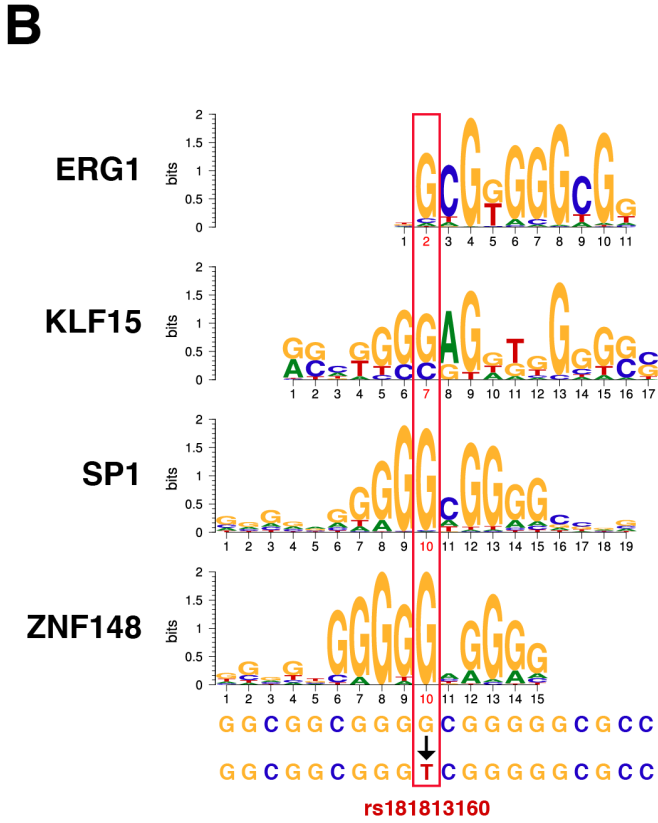

Supplemental Figure S12. Fine-mapping prioritizes SNPs in the schizophrenia-associated locus with the lead SNP, rs4144797. A) A visualization of rs181813160 in the promoter region of *NGEF* transcripts (hg19; Chr2:233792142–233794140). The plot displays transcripts, the prioritized SNP, and the mouse-derived human peaks from all ATAC-seq samples. The prioritized SNP is highlighted. B) Transcription factor binding motifs derived from HOCOMOCO v10 data that are disrupted by rs181813160. The nucleotides impacted are highlighted in a red box.
