# Supplementary material for: Leveraging mouse chromatin data for heritability enrichment informs common disease architecture and reveals cortical layer contributions to schizophrenia
Source: PubMed Central journal article supplement — Genome Res. 2020 Apr;30(4):528–39. doi: 10.1101/gr.256578.119 (PMC7197474; doi:10.1101/gr.256578.119), 2020-04
Supplement: supp_gr.256578.119_Supplemental_Fig_S13.pdf [file supp_gr.256578.119_Supplemental_Fig_S13.pdf]

# Supplemental Figure S13

**A**

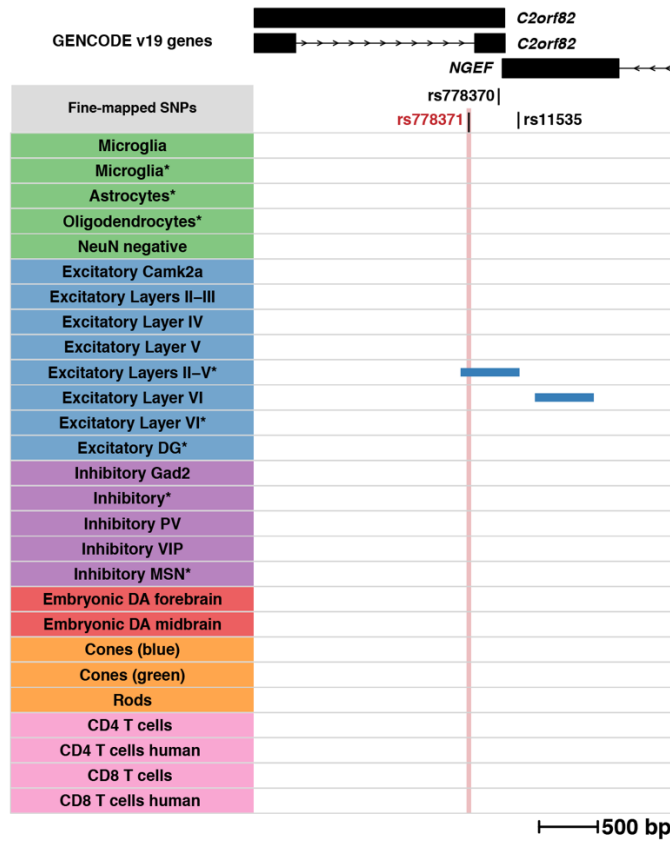

**B**

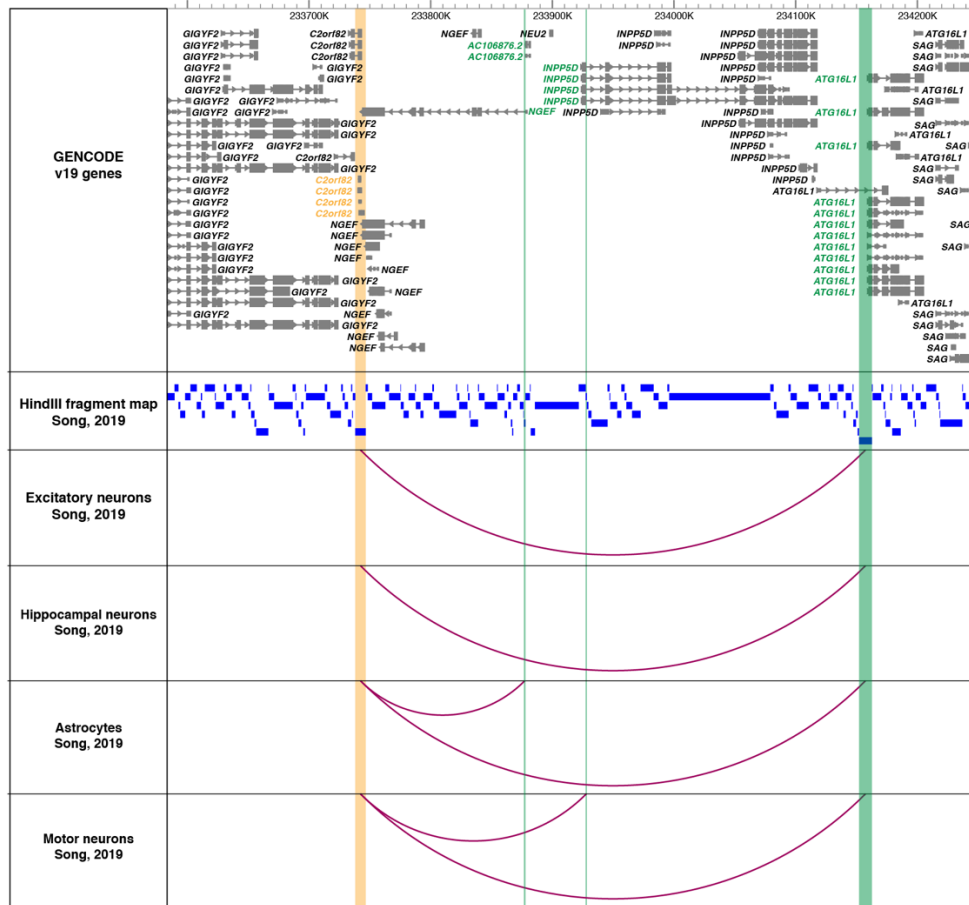

*Supplemental Figure S13.* Fine-mapping prioritizes SNPs in the schizophrenia-associated locus with the lead SNP, rs4144797. A) A visualization of rs778371 in the 3' regions of *NGEF* transcripts and *C2orf82* (hg19; Chr2:233742306–233743814). The plot displays transcripts, the prioritized SNP, and the mouse-derived human peaks from all ATAC-seq samples. The prioritized SNP is highlighted. B) Promoter-capture Hi-C data in the area around the *C2orf82* and *NGEF* genes from Song *et al.*, 2019 (Song et al. 2019) (hg19; Chr2:233580000-234260000). Only the significant interactions involving the HindIII fragment containing rs778371 are shown. The viewpoint is highlighted in gold and all promoters it interacts with are highlighted in green. All SNP-interaction data can be found in Supplemental Table S14.
