# Supplementary material for: Leveraging mouse chromatin data for heritability enrichment informs common disease architecture and reveals cortical layer contributions to schizophrenia
Source: HighWire-hosted journal article supplement (doi:10.1101/gr.256578.119), 2020-04-01
Supplement: Supplemental_Results.docx [file Supplemental_Results.docx]

**Supplemental Results**

**Base pair level comparison between samples**

In addition to the comparisons between Roadmap Epigenomics Project open chromatin data, we used Jaccard statistics to compare the mouse-derived human samples to each other. In general, we observe that cell populations tend to be most related to other samples in their same broad cell population category whether we look at raw Jaccard statistics, scaled Jaccard statistics, or the Spearman correlations of Jaccard statistics (Supplemental Fig. S3A, S3B, S3C). However, we observe in all comparisons that mouse-derived human T cell data (CD4 T cells and CD8 T cells) are more related to each other than to their orthologous human cell populations (CD4 T cells human and CD8 T cells human) (Supplemental Fig. S3A, S3B, S3C). We also observe that data derived from single-nuclei tend to show less similarity to other bulk data samples in the same category. This can be seen for Inhibitory* and Inhibitory MSN* samples when using raw or scaled Jaccard statistics (Supplemental Fig. S3A, S3B).

**New biology is revealed by analyzing mouse-derived human profiles with S-LDSC**

In addition to the expected enrichments that we observe in our S-LDSC analysis across 64 GWAS, we also observe new biological insights for complex traits. First, we observe enrichment for age of menarche, female age at first birth, and number of children (pooled) in the same neuronal cell populations in which we observe enrichment for traits like neuroticism (Figure 3A). For example, we observe significant enrichment for age at menarche in neurons from the Embryonic DA midbrain, Excitatory Layers II-III, IV, and V, as well as Excitatory Layer II-V*, and Excitatory DG* populations (Figure 3A; Supplemental Table S6). Although perhaps initially unexpected, these traits have been shown to have significant genetic correlation with various cognitive phenotypes (Lam et al. 2017). Further, we observe that along with neuronal enrichments, blue cones are also enriched for heritability of the “morning person” trait (Figure 3A; Supplemental Table S6). This observation is consistent with the recent finding that genes expressed highly in retinal tissue are enriched in “morning person” loci (Jones et al. 2019), adding evidence to a potential biological relationship. Additionally, we observe that the only population enriched for body mass index (BMI) heritability are astrocytes (Figure 3A; Supplemental Table S6). This observation adds to mounting evidence that astrocytes and other glia play a role in controlling body weight (García-Cáceres et al. 2012).

**Comparison of S-LDSC results from two SCZ GWAS**

Heritability enrichment in the “SCZ vs. controls” GWAS from the Psychiatric Genomics Consortium (Bipolar Disorder and Schizophrenia Working Group of the Psychiatric Genomics Consortium 2018) were compared the results to the CLOZUK study. While the “SCZ vs. controls” samples were also included in the CLOZUK study, the studies were performed independently, and thus their results differ slightly (Figure 4A, 4B; Supplemental Fig. S7A, S7B; Supplemental Table S6). All excitatory neuron populations reach significance in both, with layer V neurons displaying greatest enrichment. Furthermore, both broadly defined inhibitory neuronal populations as well as inhibitory MSNs are found in both. However, the enrichments for embryonic forebrain dopaminergic neurons, astrocytes, as well as inhibitory VIP and PV neurons, did not agree between the studies (Figure 4B; Supplemental Fig. S7B).

**Note on duplicated fine-mapping SNPs**

Since we used SNPs in LD with independent signals, not amalgamated loci, 2,317 SNPs were fine-mapped in more than one locus. 39 variants achieve a PIP ≥ 0.1 across multiple loci, potentially identifying single variants contributing to multiple reported “independent” signals (Supplemental Table S10). For example, rs11682175 is in LD with two independent index SNPs located at *VRK2*, rs75575209 (*r*2 = 0.105) and rs7596038 (*r*2 = 0.326).

rs11682175 achieves high PIPs with annotation in both loci (0.999 and 0.864 in rs75575209 and rs7596038, respectively) (Supplemental Table S10). While not reported in the CLOZUK GWAS, rs11682175 has been significantly associated with major depression (Wray et al. 2018), neuroticism (Nagel et al. 2018), and previous SCZ GWAS (Schizophrenia Working Group of the Psychiatric Genomics Consortium 2014). This SNP, however, does not intersect with any OCRs in the cell populations studied.

We believe that we observe this result due to the “clumping” methodology used during the original GWAS (Pardiñas et al. 2018). While the top fine-mapped SNP (rs11682175) reaches genome-wide significance in the original GWAS, it seems to be grouped under rs7596038 during the first clumping procedure (based on LD and P-values) and was not reported as an “independent” signal (Pardiñas et al. 2018) (Supplemental Fig. S9). rs11682175 is more significant than rs75575209, but since it is in low LD with rs75575209, it is included in that “independent” locus. This high significance but low LD with the lead SNPs cause this SNP to rise to the top of both loci and may represent an independent signal masked by clumping.

**Fine-mapping example loci**

In addition to the locus that encompasses the *SOX2-OT* promoter, two other loci provided interesting examples of the hypotheses that can be constructed from the data presented in our manuscript.

The locus tagged by rs2565065 contains 224 fine-mapped SNPs within an interval containing *CHRNA2*, *MIR6842*, and *PTK2B*. In this locus, only 3 SNPs achieve a PIP > 0.1 and two of those SNPs overlap with a SCZ enriched OCR (Supplemental Table S8). Both SNPs are located in the promoter region of *CHRNA2* transcripts and intersect a single OCR in broadly defined inhibitory neurons (Inhibitory*) (Supplemental Fig. S11A; Supplemental Table S11). One of the SNPs, rs2565064, creates motifs for five TFs including GLI1, GLIS3, PLAG1, ZBTB7B, ZNF219 (Supplemental Fig. S11B; Supplemental Table S12). These SNPs reside in a fragment that interacts with the promoter of other *CHRNA2* isoforms, *EPHX2*, and *CLU* in excitatory and hippocampal DG neurons (Supplemental Fig. S11C; Supplemental Table S14). Nicotinic receptors have been extensively linked to SCZ (Ripoll et al. 2004) and *Chrna2* deletion in mice modulated nicotine-related behaviors (Lotfipour et al. 2013). Further, modulation of both *CLU* and *EPHX2* have been shown to have neuroprotective effects (Foster et al. 2019; Koerner et al. 2007; Zhang et al. 2008; Chang et al. 2018). This leads us to construct a hypothesis where both SNPs (rs1805203 and rs1805645) impact regulatory DNA sequences leading to modulated expression of *CHRNA2*, *EPHX2*, and *CLU*, in inhibitory neurons, potentially changing how those cells respond to nicotine and cellular stress conditions.

In a more complex example, the locus tagged by rs4144797 contains 395 fine-mapped SNPs within an interval containing the *GIGYF2*, *KCNJ13*, *SNORC*, and *NGEF* genes. In this locus, 13 SNPs achieve a PIP > 0.1; nine intersect with an OCR, four disrupt a TF binding motif, and one is involved in a PCHi-C interaction (Supplemental Table S8). One of these SNPs, rs181813160, resides in the promoter of the *NGEF* gene, intersects 12/13 enriched populations, and has the highest PIP (~0.97) in the locus (Supplemental Fig. S12A; Supplemental Table S9). rs181813160 is predicted to strongly disrupt motifs for 13 different TFs including EGR1, KLF15, SP1, and ZNF148 (Supplemental Fig. S12B; Supplemental Table S12). Further in this locus, rs778371, located in the 3’ region of *C2orf82* and *NGEF* transcripts, resides in an OCR in Excitatory Layers II-V* neurons (Supplemental Fig. S13A; Supplemental Table S11). This SNP resides in a region that participates in significant promoter interactions in excitatory neurons, hippocampal DG neurons, astrocytes, and motor neurons (Supplemental Fig. S13B; Supplemental Table S14). In excitatory and hippocampal DG neurons this region interacts with the *ATG16L1* promoter (Supplemental Fig. S13B; Supplemental Table S14). Connecting these two SNPs together, *NGEF* regulates the growth of axons and dendrites in neurons (Shamah et al. 2001; Blackmore et al. 2010) and the TF binding sites disrupted in the *NGEF* promoter are implicated in modulating synaptic plasticity, impacting neurite growth, and impaired brain development (Duclot and Kabbaj 2017; Moore et al. 2011; Stevens et al. 2016). *ATG16L1* plays a role in autophagy and has been associated with Crohn’s disease. While *ATG16L1* has not been directly associated, autophagy has been linked to neuronal development as well as neurite and axon growth (Stavoe and Holzbaur 2019). All this information helps construct a hypothesis that would link this locus to disrupted neuronal connectivity in SCZ (Sekar et al. 2016; Cannon 2015; Sellgren et al. 2019) in a variety of different cell-types, perhaps simultaneously.

**References**

Bipolar Disorder and Schizophrenia Working Group of the Psychiatric Genomics Consortium. 2018. Genomic Dissection of Bipolar Disorder and Schizophrenia, Including 28 Subphenotypes. *Cell* **173**: 1705–1715.e16.

Blackmore MG, Moore DL, Smith RP, Goldberg JL, Bixby JL, Lemmon VP. 2010. High content screening of cortical neurons identifies novel regulators of axon growth. *Mol Cell Neurosci* **44**: 43–54.

Cannon TD. 2015. How Schizophrenia Develops: Cognitive and Brain Mechanisms Underlying Onset of Psychosis. *Trends Cogn Sci* **19**: 744–756.

Chang L-H, Lin H-C, Huang S-S, Chen I-C, Chu K-W, Chih C-L, Liang Y-W, Lee Y-C, Chen Y-Y, Lee Y-H, et al. 2018. Blockade of soluble epoxide hydrolase attenuates post-ischemic neuronal hyperexcitation and confers resilience against stroke with TrkB activation. *Sci Rep* **8**: 118.

Duclot F, Kabbaj M. 2017. The Role of Early Growth Response 1 (EGR1) in Brain Plasticity and Neuropsychiatric Disorders. *Front Behav Neurosci* **11**: 35.

Foster EM, Dangla-Valls A, Lovestone S, Ribe EM, Buckley NJ. 2019. Clusterin in Alzheimer’s Disease: Mechanisms, Genetics, and Lessons From Other Pathologies. *Front Neurosci* **13**: 164.

García-Cáceres C, Fuente-Martín E, Argente J, Chowen JA. 2012. Emerging role of glial cells in the control of body weight. *Mol Metab* **1**: 37–46.

Jones SE, Lane JM, Wood AR, van Hees VT, Tyrrell J, Beaumont RN, Jeffries AR, Dashti HS, Hillsdon M, Ruth KS, et al. 2019. Genome-wide association analyses of chronotype in 697,828 individuals provides insights into circadian rhythms. *Nat Commun* **10**: 343.

Koerner IP, Jacks R, DeBarber AE, Koop D, Mao P, Grant DF, Alkayed NJ. 2007. Polymorphisms in the human soluble epoxide hydrolase gene EPHX2 linked to neuronal survival after ischemic injury. *J Neurosci* **27**: 4642–4649.

Lotfipour S, Byun JS, Leach P, Fowler CD, Murphy NP, Kenny PJ, Gould TJ, Boulter J. 2013. Targeted deletion of the mouse α2 nicotinic acetylcholine receptor subunit gene (Chrna2) potentiates nicotine-modulated behaviors. *J Neurosci* **33**: 7728–7741.

Moore DL, Apara A, Goldberg JL. 2011. Krüppel-like transcription factors in the nervous system: novel players in neurite outgrowth and axon regeneration. *Mol Cell Neurosci* **47**: 233–243.

Ripoll N, Bronnec M, Bourin M. 2004. Nicotinic receptors and schizophrenia. *Curr Med Res Opin* **20**: 1057–1074.

Sekar A, Bialas AR, de Rivera H, Davis A, Hammond TR, Kamitaki N, Tooley K, Presumey J, Baum M, Van Doren V, et al. 2016. Schizophrenia risk from complex variation of complement component 4. *Nature* **530**: 177–183.

Sellgren CM, Gracias J, Watmuff B, Biag JD, Thanos JM, Whittredge PB, Fu T, Worringer K, Brown HE, Wang J, et al. 2019. Increased synapse elimination by microglia in schizophrenia patient-derived models of synaptic pruning. *Nat Neurosci* **22**: 374–385.

Shamah SM, Lin MZ, Goldberg JL, Estrach S, Sahin M, Hu L, Bazalakova M, Neve RL, Corfas G, Debant A, et al. 2001. EphA receptors regulate growth cone dynamics through the novel guanine nucleotide exchange factor ephexin. *Cell* **105**: 233–244.

Stavoe AKH, Holzbaur ELF. 2019. Autophagy in Neurons. *Annu Rev Cell Dev Biol* **35**: 477–500.

Stevens SJC, van Essen AJ, van Ravenswaaij CMA, Elias AF, Haven JA, Lelieveld SH, Pfundt R, Nillesen WM, Yntema HG, van Roozendaal K, et al. 2016. Truncating de novo mutations in the Krüppel-type zinc-finger gene ZNF148 in patients with corpus callosum defects, developmental delay, short stature, and dysmorphisms. *Genome Med* **8**: 131.

Zhang W, Otsuka T, Sugo N, Ardeshiri A, Alhadid YK, Iliff JJ, DeBarber AE, Koop DR, Alkayed NJ. 2008. Soluble epoxide hydrolase gene deletion is protective against experimental cerebral ischemia. *Stroke* **39**: 2073–2078.
