# Supplementary material for: Leveraging mouse chromatin data for heritability enrichment informs common disease architecture and reveals cortical layer contributions to schizophrenia
Source: HighWire-hosted journal article supplement (doi:10.1101/gr.256578.119), 2020-04-01
Supplement: Supplemental_Table_S3.xlsx [file Supplemental_Table_S3.xlsx]

## Sheet: README
Supplemental Table S3. Summary of T cell peak overlap data. This includes the mouse-derived human open chromatin profile file name (“human.mouse_filename”), the total number of mouse-derived human peaks (“total.peaks”), the filename of the human open chromatin data (“human_filename”), the sample name used for the human data (“sample.name”), the total number of peaks in the human data (“human.tota…

## Sheet: Supplemental Table S3
human.mouse_filename	total.peaks	human_filename	sample.name	human.total.peaks	overlap.count
summits_filter2_cd4_mm10_merged_GSE107076_summits.bed	39080	final_CD4-summits_corces_hg19_summits.bed	ATAC.human	40530	16271
summits_filter2_cd4_mm10_merged_GSE107076_summits.bed	39080	cd4.naive_dnase.roadmap.bed	naive.roadmap	80877	22033
summits_filter2_cd4_mm10_merged_GSE107076_summits.bed	39080	cd4.memory_dnase.roadmap.bed	memory.roadmap	87997	22723
summits_filter2_cd4_mm10_merged_GSE107076_summits.bed	39080	merged_cd4_atac.roadmap.bed	combined.atac.roadmap	96027	23305
summits_filter2_cd4_mm10_merged_GSE107076_summits.bed	39080	merged_roadmap_imputed_DNase.bed	all.roadmap	493894	31582
summits_filter2_cd4_mm10_merged_GSE107076_summits.bed	39080	all.roadmap_cd4_atac.bed	all.roadmap.plus.atac	494499	31631
summits_filter2_cd8_mm10_merged_GSE107076_summits.bed	38299	final_CD8-summits_corces_hg19_summits.bed	ATAC.human	40916	16674
summits_filter2_cd8_mm10_merged_GSE107076_summits.bed	38299	cd8.naive_dnase.roadmap.bed	naive.roadmap	77770	22927
summits_filter2_cd8_mm10_merged_GSE107076_summits.bed	38299	cd8.memory_dnase.roadmap.bed	memory.roadmap	80049	22689
summits_filter2_cd8_mm10_merged_GSE107076_summits.bed	38299	merged_cd8_atac.roadmap.bed	combined.atac.roadmap	90267	23698
summits_filter2_cd8_mm10_merged_GSE107076_summits.bed	38299	merged_roadmap_imputed_DNase.bed	all.roadmap	493894	31757
summits_filter2_cd8_mm10_merged_GSE107076_summits.bed	38299	all.roadmap_cd8_atac.bed	all.roadmap.plus.atac	494569	31796
