# Supplementary material for: Leveraging mouse chromatin data for heritability enrichment informs common disease architecture and reveals cortical layer contributions to schizophrenia
Source: HighWire-hosted journal article supplement (doi:10.1101/gr.256578.119), 2020-04-01
Supplement: Supplemental_Table_S4.xlsx [file Supplemental_Table_S4.xlsx]

## Sheet: README
Supplemental Table S4. Summary of overlap data for all cell populations. This includes the cell population name (“population”), the total number of peaks in that profile (“total_peaks”), the number and percentage of peaks that overlap with all Roadmap Epigenomic Project data (“roadmap_peaks” and “roadmap_percent”), the number and percentage of peaks that overlap with brain related tissues in Road…

## Sheet: Supplemental Table S4
population	total_peaks	roadmap_peaks	roadmap_percent	roadmap_brain_peaks	roadmap_brain_percent	boca_peaks	boca_percent	combined_peaks	combined_percent
Human CD4 T-cells	40530	39921	0.98	30608	0.76	24028	0.59	40179	0.99
Human CD8 T-cells	40916	40231	0.98	30475	0.74	23340	0.57	40447	0.99
Microglia	43126	36543	0.85	29063	0.67	20221	0.47	37294	0.86
Astrocytes*	44185	33437	0.76	27697	0.63	19280	0.44	34666	0.78
Cones (blue)	31138	25897	0.83	22402	0.72	18029	0.58	26540	0.85
CD4 T-cells	39080	32434	0.83	24971	0.64	18307	0.47	33229	0.85
CD8 T-cells	38299	32565	0.85	25494	0.67	18403	0.48	33245	0.87
Excitatory Camk2a	57937	36800	0.64	28067	0.48	31038	0.54	42166	0.73
Inhibitory PV	43899	33189	0.76	27667	0.63	27493	0.63	35996	0.82
Inhibitory VIP	49088	36653	0.75	30846	0.63	27995	0.57	39415	0.8
Excitatory Layers II/III	65021	49735	0.76	41223	0.63	36250	0.56	53722	0.83
Excitatory Layer VI*	42292	29795	0.7	24053	0.57	22087	0.52	32312	0.76
Excitatory DG*	72366	47405	0.66	36526	0.5	33376	0.46	52451	0.72
Excitatory Layers II-V*	68342	45933	0.67	35840	0.52	32905	0.48	50682	0.74
Embryonic DA forebrain	40188	34410	0.86	31239	0.78	27193	0.68	36382	0.91
Inhibitory Gad2	63960	51329	0.8	43397	0.68	35422	0.55	54255	0.85
Cones (green)	32605	26795	0.82	22769	0.7	18485	0.57	27553	0.85
Inhibitory*	38896	25907	0.67	20547	0.53	19862	0.51	28688	0.74
Inhibitory MSN*	46481	34760	0.75	28632	0.62	23126	0.5	36709	0.79
Embryonic DA midbrain	39398	34585	0.88	31227	0.79	26421	0.67	36055	0.92
Microglia*	38633	29682	0.77	23446	0.61	16958	0.44	30770	0.8
Neun negative	39437	28266	0.72	24111	0.61	20096	0.51	29938	0.76
Excitatory Layer VI	70263	52527	0.75	42692	0.61	36250	0.52	56496	0.8
Oligodendrocytes*	34771	27486	0.79	23607	0.68	17227	0.5	28396	0.82
Excitatory Layer V	70258	52828	0.75	43072	0.61	38463	0.55	57254	0.81
Rods	24016	20695	0.86	18275	0.76	14521	0.6	21029	0.88
Excitatory Layer IV	69358	51703	0.75	41803	0.6	36991	0.53	56078	0.81
