# Supplementary material for: Leveraging mouse chromatin data for heritability enrichment informs common disease architecture and reveals cortical layer contributions to schizophrenia
Source: HighWire-hosted journal article supplement (doi:10.1101/gr.256578.119), 2020-04-01
Supplement: Supplemental_Table_S5_.xlsx [file Supplemental_Table_S5_.xlsx]

## Sheet: README
Supplemental Table S5. Summary of all the summary statistics analyzed with S-LDSC. This includes the phenotype name (“Phenotype”), the name of the source of the data (“Source”), the URL from which the data was downloaded (“URL”), PubMed ID for any accompanying publications (“PMID”), the filename of the summary statistics (“Filename”), the exact LDSC munge command used to process the data (“Munge_…

## Sheet: Supplemental Table S5
Phenotype	Source	URL	PMID	Filename	Munge_command	Notes
ADHD	PGC	https://www.med.unc.edu/pgc/results-and-downloads	30478444	adhd_eur_jun2017.gz	~/ldsc/munge_sumstats.py --sumstats adhd_eur_jun2017.gz --out ADHD_PGC --N-cas 19099 --N-con 34194	.
Alzheimer disease	Centre for Cognitive Ageing and Cognitive Epidemiology¬†	http://www.psy.ed.ac.uk/ccace/downloads/UKB_AD_sumstats_17May2018.zip	29777097	4_UK_Biobank_IGAP_17May2018	~/ldsc/munge_sumstats.py --sumstats 4_UK_Biobank_IGAP_17May2018 --merge-alleles ../../../w_hm3.snplist --out ../Alz_Marioni --N-con 314278 --N-cas 74046	Since publication the GWAS summary statistics have been updated and a corrected version of these summary statistics can be found here: https://datashare.is.ed.ac.uk/handle/10283/3364
BMI	GIANT	https://portals.broadinstitute.org/collaboration/giant/index.php/GIANT_consortium_data_files	25673413	SNP_gwas_mc_merge_nogc.tbl.uniq.gz	~/ldsc/munge_sumstats.py --sumstats SNP_gwas_mc_merge_nogc.tbl.uniq.gz --merge-alleles ../../w_hm3.snplist --out BMI-GIANT-2015 --frq Freq.Allele1.HapMapCEU	.
Epilepsy - all	ILAE	http://www.epigad.org/gwas_ilae2014/	24162737	ILAE_All_Epi_11.8.14.txt.gz	~/ldsc/munge_sumstats.py --sumstats ILAE_All_Epi_11.8.14.txt.gz --out Epilepsy_All --N-col Weight --snp MarkerName --merge-alleles ../../w_hm3.snplist	.
Epilepsy - focal	ILAE	http://www.epigad.org/gwas_ilae2014/	24162737	ILAE_Focal_5.8.14.txt.gz	~/ldsc/munge_sumstats.py --sumstats ILAE_Focal_5.8.14.txt.gz --out Epilepsy_Focal --N-col Weight --snp MarkerName --merge-alleles ../../w_hm3.snplist	.
Epilepsy - GGE	ILAE	http://www.epigad.org/gwas_ilae2014/	24162737	ILAE_GGE_5.8.14.txt.gz	~/ldsc/munge_sumstats.py --sumstats ILAE_GGE_5.8.14.txt.gz --out Epilepsy_GGE --N-col Weight --snp MarkerName --merge-alleles ../../w_hm3.snplist	.
Schizophrenia - CLOZUK	CLOZUK	http://walters.psycm.cf.ac.uk/	29483656	clozuk_pgc2.meta.sumstats.txt.gz	~/ldsc/munge_sumstats.py --out frq_SZ-CLOZUK --merge-alleles clozuk_pgc2.meta.sumstats.info9.snplist.txt.gz --frq Freq.A1 --N-con 64643 --N-cas 40675 --sumstats clozuk_pgc2.meta.sumstats.txt.gz	Munged summary statistics needed to be modified further in order to only keep SNPs with RS numbers. See scripts for information.
Height	GIANT	https://portals.broadinstitute.org/collaboration/giant/index.php/GIANT_consortium_data_files	25282103	GIANT_HEIGHT_Wood_et_al_2014_publicrelease_HapMapCeuFreq.txt.gz	~/ldsc/munge_sumstats.py --sumstats GIANT_HEIGHT_Wood_et_al_2014_publicrelease_HapMapCeuFreq.txt.gz --merge-alleles ../../w_hm3.snplist --out frq_Height-GIANT --frq Freq.Allele1.HapMapCEU	.
Insomnia	Complex Trait Genetics lab	https://ctg.cncr.nl/software/summary_statistics	30804565	Insomnia_sumstats_Jansenetal.txt.gz	~/ldsc/munge_sumstats.py --out insomnia-2018 --sumstats Insomnia_sumstats_Jansenetal.txt.gz	.
Education Years	Social Science Genetic Association Consortium	https://www.thessgac.org/data	30038396	GWAS_EA_excl23andMe.txt	~/ldsc/munge_sumstats.py --sumstats GWAS_EA_excl23andMe.txt --merge-alleles ../../w_hm3.snplist --out Intelligence-2018 --N 766345	.
MDD	PGC	https://www.med.unc.edu/pgc/results-and-downloads	29700475	MDD2018_ex23andMe.gz	python ~/ldsc/munge_sumstats.py --sumstats MDD2018_ex23andMe.gz --out MDD-2018 --daner-n	.
Bipolar-SCZ vs. controls	PGC	https://www.med.unc.edu/pgc/results-and-downloads	29906448	BDSCZvsCONT.sumstats.gz	~/ldsc/munge_sumstats.py --sumstats BDSCZvsCONT.sumstats.gz --out munged_BDSCZvsCONT --daner	.
Bipolar disorder	PGC	https://www.med.unc.edu/pgc/results-and-downloads	29906448	BDvsCONT.sumstats.gz	~/ldsc/munge_sumstats.py --sumstats BDvsCONT.sumstats.gz --out munged_BDvsCONT --daner	.
Eosinophil Count	Price	https://data.broadinstitute.org/alkesgroup/UKBB/UKBB_409K/	.	blood_EOSINOPHIL_COUNT.sumstats.gz	~/ldsc/munge_sumstats.py --sumstats $sumstat_file --out munged_${sumstat_file%.sumstats.gz}	.
High Light Scatter Reticulocyte Count	Price	https://data.broadinstitute.org/alkesgroup/UKBB/UKBB_409K/	.	blood_HIGH_LIGHT_SCATTER_RETICULOCYTE_COUNT.sumstats.gz	~/ldsc/munge_sumstats.py --sumstats $sumstat_file --out munged_${sumstat_file%.sumstats.gz}	.
Lymphocyte Count	Price	https://data.broadinstitute.org/alkesgroup/UKBB/UKBB_409K/	.	blood_LYMPHOCYTE_COUNT.sumstats.gz	~/ldsc/munge_sumstats.py --sumstats $sumstat_file --out munged_${sumstat_file%.sumstats.gz}	.
Mean Sphered Cell Volume	Price	https://data.broadinstitute.org/alkesgroup/UKBB/UKBB_409K/	.	blood_MEAN_SPHERED_CELL_VOL.sumstats.gz	~/ldsc/munge_sumstats.py --sumstats $sumstat_file --out munged_${sumstat_file%.sumstats.gz}	.
Monocyte Count	Price	https://data.broadinstitute.org/alkesgroup/UKBB/UKBB_409K/	.	blood_MONOCYTE_COUNT.sumstats.gz	~/ldsc/munge_sumstats.py --sumstats $sumstat_file --out munged_${sumstat_file%.sumstats.gz}	.
Red Blood Cell Distribution Width	Price	https://data.broadinstitute.org/alkesgroup/UKBB/UKBB_409K/	.	blood_RBC_DISTRIB_WIDTH.sumstats.gz	~/ldsc/munge_sumstats.py --sumstats $sumstat_file --out munged_${sumstat_file%.sumstats.gz}	.
White Blood Cell Count	Price	https://data.broadinstitute.org/alkesgroup/UKBB/UKBB_409K/	.	blood_WHITE_COUNT.sumstats.gz	~/ldsc/munge_sumstats.py --sumstats $sumstat_file --out munged_${sumstat_file%.sumstats.gz}	.
Balding Type I	Price	https://data.broadinstitute.org/alkesgroup/UKBB/UKBB_409K/	.	body_BALDING1.sumstats.gz	~/ldsc/munge_sumstats.py --sumstats $sumstat_file --out munged_${sumstat_file%.sumstats.gz}	.
Balding Type IV	Price	https://data.broadinstitute.org/alkesgroup/UKBB/UKBB_409K/	.	body_BALDING4.sumstats.gz	~/ldsc/munge_sumstats.py --sumstats $sumstat_file --out munged_${sumstat_file%.sumstats.gz}	.
Waist-hip Ratio	Price	https://data.broadinstitute.org/alkesgroup/UKBB/UKBB_409K/	.	body_WHRadjBMIz.sumstats.gz	~/ldsc/munge_sumstats.py --sumstats $sumstat_file --out munged_${sumstat_file%.sumstats.gz}	.
Diastolic Blood Pressure	Price	https://data.broadinstitute.org/alkesgroup/UKBB/UKBB_409K/	.	bp_DIASTOLICadjMEDz.sumstats.gz	~/ldsc/munge_sumstats.py --sumstats $sumstat_file --out munged_${sumstat_file%.sumstats.gz}	.
Systolic Blood Pressure	Price	https://data.broadinstitute.org/alkesgroup/UKBB/UKBB_409K/	.	bp_SYSTOLICadjMEDz.sumstats.gz	~/ldsc/munge_sumstats.py --sumstats $sumstat_file --out munged_${sumstat_file%.sumstats.gz}	.
Smoking Status	Price	https://data.broadinstitute.org/alkesgroup/UKBB/UKBB_409K/	.	cov_SMOKING_STATUS.sumstats.gz	~/ldsc/munge_sumstats.py --sumstats $sumstat_file --out munged_${sumstat_file%.sumstats.gz}	.
Autoimmune Traits	Price	https://data.broadinstitute.org/alkesgroup/UKBB/UKBB_409K/	.	disease_AID_ALL.sumstats.gz	~/ldsc/munge_sumstats.py --sumstats $sumstat_file --out munged_${sumstat_file%.sumstats.gz}	.
Eczema	Price	https://data.broadinstitute.org/alkesgroup/UKBB/UKBB_409K/	.	disease_ALLERGY_ECZEMA_DIAGNOSED.sumstats.gz	~/ldsc/munge_sumstats.py --sumstats $sumstat_file --out munged_${sumstat_file%.sumstats.gz}	.
Asthma	Price	https://data.broadinstitute.org/alkesgroup/UKBB/UKBB_409K/	.	disease_ASTHMA_DIAGNOSED.sumstats.gz	~/ldsc/munge_sumstats.py --sumstats $sumstat_file --out munged_${sumstat_file%.sumstats.gz}	.
Cardiovascular Diseases	Price	https://data.broadinstitute.org/alkesgroup/UKBB/UKBB_409K/	.	disease_CARDIOVASCULAR.sumstats.gz	~/ldsc/munge_sumstats.py --sumstats $sumstat_file --out munged_${sumstat_file%.sumstats.gz}	.
High Cholesterol	Price	https://data.broadinstitute.org/alkesgroup/UKBB/UKBB_409K/	.	disease_HI_CHOL_SELF_REP.sumstats.gz	~/ldsc/munge_sumstats.py --sumstats $sumstat_file --out munged_${sumstat_file%.sumstats.gz}	.
Thyroid Disease	Price	https://data.broadinstitute.org/alkesgroup/UKBB/UKBB_409K/	.	disease_THYROID_ANY_SELF_REP.sumstats.gz	~/ldsc/munge_sumstats.py --sumstats $sumstat_file --out munged_${sumstat_file%.sumstats.gz}	.
Basal Metabolic Rate	Price	https://data.broadinstitute.org/alkesgroup/UKBB/UKBB_409K/	.	impedance_BASAL_METABOLIC_RATEz.sumstats.gz	~/ldsc/munge_sumstats.py --sumstats $sumstat_file --out munged_${sumstat_file%.sumstats.gz}	.
FEV1-FVC Ratio	Price	https://data.broadinstitute.org/alkesgroup/UKBB/UKBB_409K/	.	lung_FEV1FVCzSMOKE.sumstats.gz	~/ldsc/munge_sumstats.py --sumstats $sumstat_file --out munged_${sumstat_file%.sumstats.gz}	.
Forced Vital Capacity (FVC)	Price	https://data.broadinstitute.org/alkesgroup/UKBB/UKBB_409K/	.	lung_FVCzSMOKE.sumstats.gz	~/ldsc/munge_sumstats.py --sumstats $sumstat_file --out munged_${sumstat_file%.sumstats.gz}	.
Morning Person	Price	https://data.broadinstitute.org/alkesgroup/UKBB/UKBB_409K/	.	other_MORNINGPERSON.sumstats.gz	~/ldsc/munge_sumstats.py --sumstats $sumstat_file --out munged_${sumstat_file%.sumstats.gz}	.
Sunburn Occasion	Price	https://data.broadinstitute.org/alkesgroup/UKBB/UKBB_409K/	.	pigment_SUNBURN.sumstats.gz	~/ldsc/munge_sumstats.py --sumstats $sumstat_file --out munged_${sumstat_file%.sumstats.gz}	.
Female Age at First Birth	Price	https://data.broadinstitute.org/alkesgroup/UKBB/UKBB_409K/	.	repro_AgeFirstBirth_Female.sumstats.gz	~/ldsc/munge_sumstats.py --sumstats $sumstat_file --out munged_${sumstat_file%.sumstats.gz}	.
Age at Menarche	Price	https://data.broadinstitute.org/alkesgroup/UKBB/UKBB_409K/	.	repro_MENARCHE_AGE.sumstats.gz	~/ldsc/munge_sumstats.py --sumstats $sumstat_file --out munged_${sumstat_file%.sumstats.gz}	.
Age at Menopause	Price	https://data.broadinstitute.org/alkesgroup/UKBB/UKBB_409K/	.	repro_MENOPAUSE_AGE.sumstats.gz	~/ldsc/munge_sumstats.py --sumstats $sumstat_file --out munged_${sumstat_file%.sumstats.gz}	.
Number Children (Pooled)	Price	https://data.broadinstitute.org/alkesgroup/UKBB/UKBB_409K/	.	repro_NumberChildrenEverBorn_Pooled.sumstats.gz	~/ldsc/munge_sumstats.py --sumstats $sumstat_file --out munged_${sumstat_file%.sumstats.gz}	.
SCZ vs. BD	PGC	https://www.med.unc.edu/pgc/results-and-downloads	29906448	SCZvsBD.sumstats.gz	~/ldsc/munge_sumstats.py --sumstats SCZvsBD.sumstats.gz --out munged_SZvsBD --daner	.
SCZ vs. Cont	PGC	https://www.med.unc.edu/pgc/results-and-downloads	29906448	SCZvsCONT.sumstats.gz	~/ldsc/munge_sumstats.py --sumstats SCZvsCONT.sumstats.gz --out munged_SZvsCONT --daner	.
Neuroticism	Complex Trait Genetics lab	https://ctg.cncr.nl/software/summary_statistics	29942085	sumstats_neuroticism_ctg_format.txt.gz	~/ldsc/munge_sumstats.py --out frq_Neurot-Nagel --frq MAF_UKB --snp RSID --info INFO_UKB --sumstats sumstats_neuroticism_ctg_format.txt.gz --ignore SNP	.
Anorexia	Price	https://data.broadinstitute.org/alkesgroup/sumstats_formatted/	.	PASS_Anorexia.sumstats	.	Processed by Alkes Price's group
Autism	Price	https://data.broadinstitute.org/alkesgroup/sumstats_formatted/	.	PASS_Autism.sumstats	.	Processed by Alkes Price's group
Celiac disease	Price	https://data.broadinstitute.org/alkesgroup/sumstats_formatted/	.	PASS_Celiac.sumstats¬†	.	Processed by Alkes Price's group
Coronary artery disease	Price	https://data.broadinstitute.org/alkesgroup/sumstats_formatted/	.	PASS_Coronary_Artery_Disease.sumstats¬†	.	Processed by Alkes Price's group
Crohn disease	Price	https://data.broadinstitute.org/alkesgroup/sumstats_formatted/	.	PASS_Crohns_Disease.sumstats ¬†	.	Processed by Alkes Price's group
Depressive Symptoms	Price	https://data.broadinstitute.org/alkesgroup/sumstats_formatted/	.	PASS_DS.sumstats¬†	.	Processed by Alkes Price's group
Ever smoked	Price	https://data.broadinstitute.org/alkesgroup/sumstats_formatted/	.	PASS_Ever_Smoked.sumstats ¬† ¬† ¬† ¬† ¬† ¬† ¬†	.	Processed by Alkes Price's group
Fasting glucose	Price	https://data.broadinstitute.org/alkesgroup/sumstats_formatted/	.	PASS_Fasting_Glucose.sumstats	.	Processed by Alkes Price's group
HDL	Price	https://data.broadinstitute.org/alkesgroup/sumstats_formatted/	.	PASS_HDL.sumstats	.	Processed by Alkes Price's group
IBD	Price	https://data.broadinstitute.org/alkesgroup/sumstats_formatted/	.	PASS_IBD.sumstats¬†	.	Processed by Alkes Price's group
LDL	Price	https://data.broadinstitute.org/alkesgroup/sumstats_formatted/	.	PASS_LDL.sumstats	.	Processed by Alkes Price's group
Lupus	Price	https://data.broadinstitute.org/alkesgroup/sumstats_formatted/	.	PASS_Lupus.sumstats	.	Processed by Alkes Price's group
Multiple sclerosis	Price	https://data.broadinstitute.org/alkesgroup/sumstats_formatted/	.	PASS_Multiple_sclerosis.sumstats¬†	.	Processed by Alkes Price's group
Primary biliary cirrhosis	Price	https://data.broadinstitute.org/alkesgroup/sumstats_formatted/	.	PASS_Primary_biliary_cirrhosis.sumstats	.	Processed by Alkes Price's group
Rheumatoid arthritis	Price	https://data.broadinstitute.org/alkesgroup/sumstats_formatted/	.	PASS_Rheumatoid_Arthritis.sumstats	.	Processed by Alkes Price's group
Subject well being	Price	https://data.broadinstitute.org/alkesgroup/sumstats_formatted/	.	PASS_SWB.sumstats	.	Processed by Alkes Price's group
Triglycerides	Price	https://data.broadinstitute.org/alkesgroup/sumstats_formatted/	.	PASS_Triglycerides.sumstats	.	Processed by Alkes Price's group
Type 1 Diabetes	Price	https://data.broadinstitute.org/alkesgroup/sumstats_formatted/	.	PASS_Type_1_Diabetes.sumstats	.	Processed by Alkes Price's group
Type 2 Diabetes	Price	https://data.broadinstitute.org/alkesgroup/sumstats_formatted/	.	PASS_Type_2_Diabetes.sumstats	.	Processed by Alkes Price's group
Ulcerative colitis	Price	https://data.broadinstitute.org/alkesgroup/sumstats_formatted/	.	PASS_Ulcerative_Colitis.sumstats	.	Processed by Alkes Price's group
