# Supplementary material for: Leveraging mouse chromatin data for heritability enrichment informs common disease architecture and reveals cortical layer contributions to schizophrenia
Source: HighWire-hosted journal article supplement (doi:10.1101/gr.256578.119), 2020-04-01
Supplement: Supplemental_Table_S6_.xlsx [file Supplemental_Table_S6_.xlsx]

## Sheet: README
Supplemental Table S6. The results from S-LDSC for all 64 traits analyzed. Each tab in the document contains results from a different set of summary statistics. Each tab contains the cell population (“cell.population”), the broad type of cell (“type”), the phenotype analyzed (“pheno”), the estimated disease heritability and standard error (“h2”, “h2_se”), the number of SNPs included in the analys…

## Sheet: ADHD
cell.population	type	phenotype	h2	h2_se	n_snps	Prop._SNPs	Prop._h2	Prop._h2_std_error	Enrichment	Enrichment_std_error	Enrichment_p	Coefficient	Coefficient_std_error	Coefficient_z-score	p	p.log10	signif.all
Embryonic DA forebrain	Dopaminergic neurons	ADHD	0.209	0.0141	965244	0.00805867	0.147518	0.0369378	18.3055	4.58361	0.000126575	5.91648e-07	1.71562e-07	3.4486	0.000281748	3.55014	no
Excitatory Layer IV	Excitatory neurons	ADHD	0.2105	0.0142	965244	0.0126719	0.161075	0.03997	12.7112	3.15423	0.000202783	3.92484e-07	1.20438e-07	3.2588	0.000559422	3.25226	no
Excitatory Layers II-III	Excitatory neurons	ADHD	0.2102	0.0142	965244	0.0117522	0.155223	0.0392071	13.2079	3.33614	0.000264859	4.10242e-07	1.33139e-07	3.0813	0.00103048	2.98696	no
Inhibitory*	Inhibitory neurons	ADHD	0.2094	0.0142	965244	0.00623486	0.104797	0.0302835	16.8082	4.85712	0.000934283	5.11016e-07	1.71032e-07	2.98783	0.00140483	2.85238	no
Inhibitory MSN*	Inhibitory neurons	ADHD	0.21	0.0142	965244	0.00761295	0.129951	0.0369726	17.0697	4.85654	0.000905728	5.27027e-07	1.80257e-07	2.92375	0.00172921	2.76215	no
NeuN negative	Glia	ADHD	0.2088	0.0141	965244	0.00717159	0.118579	0.0361816	16.5345	5.04513	0.00169701	5.3291e-07	1.88388e-07	2.82879	0.0023362	2.63149	no
Embryonic DA midbrain	Dopaminergic neurons	ADHD	0.2092	0.0142	965244	0.00795265	0.11531	0.0333389	14.4996	4.19217	0.00109905	4.29857e-07	1.60303e-07	2.68153	0.00366432	2.43601	no
Excitatory Layer VI*	Excitatory neurons	ADHD	0.2095	0.0141	965244	0.00682871	0.101357	0.0322159	14.8428	4.71772	0.00282885	4.43639e-07	1.67482e-07	2.64888	0.00403795	2.39384	no
Inhibitory VIP	Inhibitory neurons	ADHD	0.209	0.0142	965244	0.00863406	0.114956	0.0351506	13.3142	4.07116	0.00288269	3.74598e-07	1.47741e-07	2.53551	0.00561425	2.25071	no
Excitatory Layer V	Excitatory neurons	ADHD	0.2097	0.0142	965244	0.0127519	0.132683	0.0396788	10.405	3.11161	0.00282461	2.98691e-07	1.24391e-07	2.40123	0.00817011	2.08777	no
Inhibitory Gad2	Inhibitory neurons	ADHD	0.2097	0.0141	965244	0.0116855	0.127297	0.0408288	10.8936	3.49398	0.00405619	3.07922e-07	1.29677e-07	2.37454	0.00878549	2.05623	no
Oligodendrocytes*	Glia	ADHD	0.2087	0.0141	965244	0.0057566	0.082421	0.0297892	14.3177	5.17479	0.00867945	4.35271e-07	1.85142e-07	2.35101	0.00936126	2.02867	no
Excitatory Layers II-V*	Excitatory neurons	ADHD	0.2095	0.0142	965244	0.0113152	0.129781	0.0408617	11.4696	3.6112	0.00405316	3.21074e-07	1.39322e-07	2.30455	0.0105959	1.97486	no
Excitatory Layer VI	Excitatory neurons	ADHD	0.21	0.0141	965244	0.0129299	0.123046	0.0400477	9.51638	3.0973	0.00574127	2.64021e-07	1.1747e-07	2.24755	0.0123023	1.91001	no
Excitatory DG*	Excitatory neurons	ADHD	0.2094	0.0141	965244	0.0117309	0.118244	0.0389233	10.0797	3.318	0.00620256	2.59214e-07	1.24684e-07	2.07897	0.0188101	1.72561	no
CD4 T-cells	T-cells	ADHD	0.2081	0.0141	965244	0.00689899	0.0614527	0.0326108	8.90748	4.72689	0.0922706	2.56112e-07	1.71771e-07	1.49101	0.0679798	1.16762	no
Microglia*	Glia	ADHD	0.2085	0.0142	965244	0.00627143	0.0528252	0.0320522	8.42315	5.11082	0.146575	2.13771e-07	1.8294e-07	1.16853	0.121297	0.91615	no
Astrocytes*	Glia	ADHD	0.2089	0.0141	965244	0.00717142	0.0587245	0.0335252	8.18867	4.67483	0.124168	1.84996e-07	1.6927e-07	1.09291	0.137217	0.862591	no
Excitatory Camk2a	Excitatory neurons	ADHD	0.2084	0.0142	965244	0.00981973	0.0658595	0.0368655	6.70685	3.75422	0.131025	1.39095e-07	1.4182e-07	0.980785	0.163349	0.786883	no
Rods	Retina cells	ADHD	0.2082	0.0142	965244	0.00423844	0.0313264	0.0239682	7.39103	5.65496	0.256606	1.88242e-07	2.17736e-07	0.864545	0.193644	0.712995	no
Cones (blue)	Retina cells	ADHD	0.2084	0.0142	965244	0.0055412	0.0409613	0.0308114	7.39212	5.56042	0.250993	1.85439e-07	2.17118e-07	0.854093	0.196527	0.706579	no
CD8 T-cells	T-cells	ADHD	0.2082	0.0142	965244	0.00675305	0.037856	0.0332149	5.60577	4.9185	0.346785	1.20882e-07	1.82429e-07	0.662627	0.253785	0.595535	no
Inhibitory PV	Inhibitory neurons	ADHD	0.2084	0.0142	965244	0.00784092	0.0470979	0.032395	6.00667	4.13153	0.226001	9.70242e-08	1.54151e-07	0.629411	0.26454	0.577509	no
Microglia	Glia	ADHD	0.2083	0.0142	965244	0.00740712	0.0239051	0.0350667	3.22731	4.7342	0.636701	4.83723e-08	1.80569e-07	0.267888	0.394393	0.404071	no
Cones (green)	Retina cells	ADHD	0.2083	0.0141	965244	0.00576415	0.0208145	0.02672	3.61103	4.63555	0.572951	2.85903e-08	1.76795e-07	0.161714	0.435766	0.360747	no
CD4 T-cells human	T-cells	ADHD	0.2083	0.0142	965244	0.00794711	0.017117	0.0328325	2.15387	4.13137	0.779637	-8.99776e-09	1.76347e-07	-0.051023	0.520346	0.283707	no
CD8 T-cells human	T-cells	ADHD	0.2086	0.0142	965244	0.00809037	-0.00162578	0.0323349	-0.200952	3.99672	0.764336	-1.29682e-07	1.66826e-07	-0.77735	0.781524	0.107058	no

## Sheet: Age at menarche
cell.population	type	phenotype	h2	h2_se	n_snps	Prop._SNPs	Prop._h2	Prop._h2_std_error	Enrichment	Enrichment_std_error	Enrichment_p	Coefficient	Coefficient_std_error	Coefficient_z-score	p	p.log10	signif.all
Excitatory Layer IV	Excitatory neurons	Age at menarche	0.2297	0.0102	1054077	0.0126719	0.193316	0.0227775	15.2555	1.79749	4.5393e-13	4.33104e-07	7.47461e-08	5.79434	3.42952e-09	8.46477	yes
Excitatory Layers II-III	Excitatory neurons	Age at menarche	0.2291	0.0102	1054077	0.0117522	0.16383	0.0207981	13.9403	1.76971	1.74512e-11	3.60522e-07	7.30371e-08	4.93615	3.98391e-07	6.39969	yes
Excitatory Layers II-V*	Excitatory neurons	Age at menarche	0.2289	0.0101	1054077	0.0113152	0.144962	0.0224271	12.8112	1.98202	8.73602e-09	3.29408e-07	7.63915e-08	4.31211	8.08531e-06	5.0923	yes
Embryonic DA midbrain	Dopaminergic neurons	Age at menarche	0.2287	0.0101	1054077	0.00795265	0.161838	0.0249093	20.3501	3.1322	6.80909e-09	5.62235e-07	1.33333e-07	4.21679	1.23902e-05	4.90692	yes
Excitatory Layer V	Excitatory neurons	Age at menarche	0.2292	0.0102	1054077	0.0127519	0.156655	0.0209528	12.2849	1.64311	1.52652e-10	2.98423e-07	7.13204e-08	4.18426	1.43046e-05	4.84452	yes
Excitatory DG*	Excitatory neurons	Age at menarche	0.229	0.0101	1054077	0.0117309	0.14835	0.0237317	12.6461	2.023	2.29635e-08	3.27423e-07	7.95521e-08	4.11583	1.92891e-05	4.71469	yes
Excitatory Layer VI	Excitatory neurons	Age at menarche	0.2293	0.0102	1054077	0.0129299	0.147016	0.0213474	11.3702	1.65101	3.22769e-09	2.57583e-07	6.5899e-08	3.90875	4.6388e-05	4.33359	no
Cones (blue)	Retina cells	Age at menarche	0.2284	0.0101	1054077	0.0055412	0.0999201	0.0182382	18.0322	3.29139	6.03948e-07	4.79598e-07	1.29071e-07	3.71577	0.000101293	3.99442	no
Excitatory Layer VI*	Excitatory neurons	Age at menarche	0.2288	0.0102	1054077	0.00682871	0.096851	0.0187443	14.1829	2.74493	3.39816e-06	3.62e-07	1.05944e-07	3.41689	0.0003167	3.49935	no
Rods	Retina cells	Age at menarche	0.2282	0.0101	1054077	0.00423844	0.0739577	0.0143423	17.4493	3.38385	2.50891e-06	4.24498e-07	1.25428e-07	3.38439	0.000356683	3.44772	no
Embryonic DA forebrain	Dopaminergic neurons	Age at menarche	0.2283	0.0101	1054077	0.00805867	0.139972	0.0228977	17.3692	2.84137	4.77226e-08	4.14129e-07	1.24306e-07	3.33154	0.00043184	3.36468	no
Inhibitory MSN*	Inhibitory neurons	Age at menarche	0.2289	0.0101	1054077	0.00761295	0.102746	0.0184689	13.4963	2.42599	4.33557e-07	3.14081e-07	9.62152e-08	3.26436	0.00054856	3.26078	no
Cones (green)	Retina cells	Age at menarche	0.2285	0.0101	1054077	0.00576415	0.0960659	0.0185535	16.6661	3.21877	3.4863e-06	4.28381e-07	1.34341e-07	3.18876	0.000714434	3.14604	no
Astrocytes*	Glia	Age at menarche	0.2291	0.0101	1054077	0.00717142	0.0973876	0.018013	13.58	2.51178	6.98891e-07	3.26302e-07	1.02356e-07	3.1879	0.000716542	3.14476	no
Inhibitory Gad2	Inhibitory neurons	Age at menarche	0.2291	0.0102	1054077	0.0116855	0.143468	0.025804	12.2775	2.20821	1.08185e-06	2.73565e-07	9.10189e-08	3.00558	0.00132536	2.87767	no
Inhibitory*	Inhibitory neurons	Age at menarche	0.2288	0.0101	1054077	0.00623486	0.0833252	0.0169325	13.3644	2.71577	6.03229e-06	3.20774e-07	1.07891e-07	2.97312	0.00147395	2.83152	no
CD8 T-cells	T-cells	Age at menarche	0.2282	0.0102	1054077	0.00675305	0.090982	0.0181931	13.4727	2.69406	6.73408e-06	3.0712e-07	1.09801e-07	2.79707	0.00257844	2.58864	no
Microglia*	Glia	Age at menarche	0.2284	0.0102	1054077	0.00627143	0.0800982	0.0179863	12.7719	2.86798	6.97665e-05	2.9081e-07	1.22672e-07	2.37064	0.00887871	2.05165	no
NeuN negative	Glia	Age at menarche	0.2283	0.0101	1054077	0.00717159	0.0838778	0.0197382	11.6958	2.75228	9.7553e-05	2.57071e-07	1.10263e-07	2.33143	0.00986546	2.00588	no
Inhibitory PV	Inhibitory neurons	Age at menarche	0.2284	0.0101	1054077	0.00784092	0.09244	0.0182853	11.7894	2.33203	1.4548e-05	2.30117e-07	1.01071e-07	2.27678	0.0113997	1.94311	no
CD4 T-cells	T-cells	Age at menarche	0.2283	0.0102	1054077	0.00689899	0.081554	0.0186857	11.8211	2.70846	8.1892e-05	2.43522e-07	1.14232e-07	2.13183	0.0165105	1.78224	no
Oligodendrocytes*	Glia	Age at menarche	0.2285	0.0101	1054077	0.0057566	0.0677472	0.0151999	11.7686	2.64044	6.66078e-05	2.19498e-07	1.0593e-07	2.0721	0.0191282	1.71833	no
Excitatory Camk2a	Excitatory neurons	Age at menarche	0.2283	0.0101	1054077	0.00981973	0.0797975	0.0182003	8.12624	1.85344	0.000242919	1.49495e-07	7.59461e-08	1.96843	0.0245091	1.61067	no
Inhibitory VIP	Inhibitory neurons	Age at menarche	0.2285	0.0102	1054077	0.00863406	0.0856967	0.0202791	9.92543	2.34873	0.000209834	1.56234e-07	9.43203e-08	1.65642	0.0488187	1.31141	no
Microglia	Glia	Age at menarche	0.2284	0.0102	1054077	0.00740712	0.0524483	0.0165556	7.0808	2.2351	0.00716529	5.34411e-08	9.14239e-08	0.584541	0.279428	0.55373	no
CD8 T-cells human	T-cells	Age at menarche	0.2285	0.0101	1054077	0.00809037	0.0445503	0.0185995	5.50658	2.29896	0.0525774	-7.18495e-08	1.07592e-07	-0.667794	0.747867	0.126175	no
CD4 T-cells human	T-cells	Age at menarche	0.2286	0.0102	1054077	0.00794711	0.0424974	0.0189241	5.34753	2.38125	0.0704858	-8.60737e-08	1.12772e-07	-0.763251	0.777343	0.109387	no

## Sheet: Age at menopause
cell.population	type	phenotype	h2	h2_se	n_snps	Prop._SNPs	Prop._h2	Prop._h2_std_error	Enrichment	Enrichment_std_error	Enrichment_p	Coefficient	Coefficient_std_error	Coefficient_z-score	p	p.log10	signif.all
CD8 T-cells	T-cells	Age at menopause	0.1005	0.0076	1054035	0.00675305	0.19387	0.0445805	28.7085	6.60153	2.00136e-05	3.43421e-07	9.91209e-08	3.46467	0.000265441	3.57603	no
CD4 T-cells	T-cells	Age at menopause	0.1006	0.0076	1054035	0.00689899	0.155184	0.0392741	22.4937	5.69273	0.000114477	2.26437e-07	8.91864e-08	2.53892	0.00555977	2.25494	no
Microglia*	Glia	Age at menopause	0.1009	0.0076	1054035	0.00627143	0.133598	0.0375628	21.3026	5.9895	0.000676547	2.05107e-07	9.76291e-08	2.10088	0.0178259	1.74895	no
Rods	Retina cells	Age at menopause	0.1006	0.0076	1054035	0.00423844	0.123867	0.035427	29.2247	8.35851	0.000830674	2.84246e-07	1.47658e-07	1.92503	0.0271131	1.56682	no
Microglia	Glia	Age at menopause	0.1008	0.0076	1054035	0.00740712	0.134595	0.0393173	18.1711	5.30805	0.000798376	1.56104e-07	8.26722e-08	1.88823	0.0294978	1.53021	no
Cones (green)	Retina cells	Age at menopause	0.1009	0.0076	1054035	0.00576415	0.13883	0.0388337	24.0852	6.73711	0.00096168	2.32638e-07	1.2352e-07	1.8834	0.0298231	1.52545	no
Cones (blue)	Retina cells	Age at menopause	0.1008	0.0076	1054035	0.0055412	0.125023	0.038649	22.5624	6.97484	0.00258856	1.9087e-07	1.2854e-07	1.48491	0.0687843	1.16251	no
Embryonic DA forebrain	Dopaminergic neurons	Age at menopause	0.1008	0.0076	1054035	0.00805867	0.13981	0.0399216	17.349	4.95387	0.000653177	8.17983e-08	7.7658e-08	1.05331	0.146098	0.835354	no
Embryonic DA midbrain	Dopaminergic neurons	Age at menopause	0.1009	0.0077	1054035	0.00795265	0.142869	0.0449259	17.9649	5.64917	0.00245931	9.26601e-08	9.66352e-08	0.958866	0.168813	0.772594	no
Astrocytes*	Glia	Age at menopause	0.101	0.0076	1054035	0.00717142	0.102541	0.044991	14.2986	6.27365	0.0303297	8.51349e-08	9.92926e-08	0.857415	0.195608	0.708614	no
Inhibitory Gad2	Inhibitory neurons	Age at menopause	0.101	0.0076	1054035	0.0116855	0.148222	0.0539219	12.6842	4.61444	0.0111309	6.73862e-08	7.96329e-08	0.846212	0.198717	0.701764	no
Inhibitory MSN*	Inhibitory neurons	Age at menopause	0.1008	0.0076	1054035	0.00761295	0.092008	0.0436675	12.0857	5.73595	0.0519209	4.0656e-08	1.01753e-07	0.399556	0.344742	0.462506	no
Oligodendrocytes*	Glia	Age at menopause	0.1007	0.0076	1054035	0.0057566	0.0750143	0.0381456	13.031	6.62641	0.0644857	2.64832e-08	1.04225e-07	0.254097	0.39971	0.398255	no
Excitatory Layers II-III	Excitatory neurons	Age at menopause	0.1007	0.0076	1054035	0.0117522	0.103649	0.0493638	8.81949	4.20037	0.0598936	-6.25262e-09	7.16876e-08	-0.0872204	0.534752	0.271848	no
Inhibitory*	Inhibitory neurons	Age at menopause	0.1007	0.0076	1054035	0.00623486	0.0494133	0.0347751	7.92533	5.57753	0.211868	-2.54417e-08	9.32441e-08	-0.272851	0.607516	0.216442	no
CD8 T-cells human	T-cells	Age at menopause	0.1008	0.0076	1054035	0.00809037	0.0852531	0.040705	10.5376	5.03129	0.0541454	-3.71429e-08	1.04855e-07	-0.354231	0.638417	0.194896	no
Excitatory Layer VI	Excitatory neurons	Age at menopause	0.1006	0.0076	1054035	0.0129299	0.0934068	0.0463699	7.22411	3.58626	0.0817321	-2.78316e-08	6.08613e-08	-0.457295	0.676271	0.169879	no
Inhibitory VIP	Inhibitory neurons	Age at menopause	0.1007	0.0076	1054035	0.00863406	0.0610579	0.0395151	7.07175	4.57665	0.175052	-4.71595e-08	7.65772e-08	-0.615843	0.731001	0.136082	no
CD4 T-cells human	T-cells	Age at menopause	0.1009	0.0077	1054035	0.00794711	0.0693538	0.0463654	8.72692	5.83425	0.179412	-8.16973e-08	1.25421e-07	-0.651382	0.7426	0.129245	no
Excitatory Layer VI*	Excitatory neurons	Age at menopause	0.1006	0.0076	1054035	0.00682871	0.0407493	0.035227	5.96735	5.15867	0.330166	-5.64537e-08	8.48651e-08	-0.665216	0.747044	0.126654	no
Excitatory Layer V	Excitatory neurons	Age at menopause	0.1005	0.0077	1054035	0.0127519	0.0747953	0.0477714	5.86543	3.74622	0.192637	-5.27882e-08	6.23866e-08	-0.846147	0.801265	0.0962241	no
Excitatory Layers II-V*	Excitatory neurons	Age at menopause	0.1005	0.0076	1054035	0.0113152	0.0506951	0.0442345	4.48024	3.90928	0.370811	-6.32418e-08	6.6778e-08	-0.947045	0.828192	0.0818689	no
Excitatory Layer IV	Excitatory neurons	Age at menopause	0.1004	0.0077	1054035	0.0126719	0.0682558	0.0456558	5.38641	3.60293	0.221837	-6.23398e-08	5.92652e-08	-1.05188	0.853572	0.0687597	no
Excitatory DG*	Excitatory neurons	Age at menopause	0.1005	0.0076	1054035	0.0117309	0.0354811	0.0468072	3.02457	3.99006	0.610097	-7.67902e-08	6.65722e-08	-1.15349	0.875645	0.0576721	no
NeuN negative	Glia	Age at menopause	0.1006	0.0076	1054035	0.00717159	0.0209046	0.0332699	2.91492	4.63913	0.676792	-1.23581e-07	7.88144e-08	-1.568	0.94156	0.026152	no
Inhibitory PV	Inhibitory neurons	Age at menopause	0.1006	0.0076	1054035	0.00784092	0.0120824	0.0396213	1.54095	5.05314	0.914318	-1.66583e-07	8.91643e-08	-1.86827	0.969138	0.0136144	no
Excitatory Camk2a	Excitatory neurons	Age at menopause	0.1006	0.0076	1054035	0.00981973	-0.0159896	0.0383053	-1.62831	3.90085	0.500398	-1.4951e-07	6.58379e-08	-2.27088	0.988423	0.00505722	no

## Sheet: Alzheimer disease
cell.population	type	phenotype	h2	h2_se	n_snps	Prop._SNPs	Prop._h2	Prop._h2_std_error	Enrichment	Enrichment_std_error	Enrichment_p	Coefficient	Coefficient_std_error	Coefficient_z-score	p	p.log10	signif.all
Microglia	Glia	Alzheimers	0.0125	0.0018	1067853	0.00740712	0.301371	0.109833	40.6867	14.828	0.00552593	8.24559e-08	3.27828e-08	2.51522	0.00594794	2.22563	no
Microglia*	Glia	Alzheimers	0.0125	0.0018	1067853	0.00627143	0.311345	0.134997	49.645	21.5258	0.0196586	1.03834e-07	4.84108e-08	2.14486	0.015982	1.79637	no
NeuN negative	Glia	Alzheimers	0.0125	0.0018	1067853	0.00717159	0.128489	0.0853729	17.9163	11.9043	0.144632	3.05176e-08	2.66773e-08	1.14396	0.126321	0.898526	no
Astrocytes*	Glia	Alzheimers	0.0125	0.0018	1067853	0.00717142	0.11481	0.0789513	16.0094	11.0092	0.156253	2.58742e-08	2.41887e-08	1.06968	0.142381	0.846548	no
Excitatory Layers II-V*	Excitatory neurons	Alzheimers	0.0125	0.0018	1067853	0.0113152	0.0964764	0.0883435	8.52623	7.80747	0.339731	1.0968e-08	1.72279e-08	0.636645	0.262178	0.581403	no
Embryonic DA midbrain	Dopaminergic neurons	Alzheimers	0.0124	0.0018	1067853	0.00795265	0.0813241	0.0688715	10.226	8.6602	0.274716	1.1361e-08	2.00009e-08	0.568024	0.285009	0.545141	no
Oligodendrocytes*	Glia	Alzheimers	0.0124	0.0018	1067853	0.0057566	0.0672604	0.0682126	11.6841	11.8495	0.380952	1.37334e-08	2.78716e-08	0.492738	0.311099	0.507102	no
Inhibitory MSN*	Inhibitory neurons	Alzheimers	0.0124	0.0018	1067853	0.00761295	0.0539983	0.0681305	7.09296	8.9493	0.503918	5.71393e-09	2.04609e-08	0.279261	0.390022	0.408911	no
Cones (green)	Retina cells	Alzheimers	0.0124	0.0018	1067853	0.00576415	0.0414614	0.0718783	7.19299	12.4699	0.623511	1.79929e-09	2.94397e-08	0.0611179	0.475633	0.322728	no
Inhibitory*	Inhibitory neurons	Alzheimers	0.0124	0.0018	1067853	0.00623486	0.0266822	0.0903381	4.27951	14.4892	0.827463	5.792e-10	3.29751e-08	0.0175648	0.492993	0.307159	no
Excitatory Layers II-III	Excitatory neurons	Alzheimers	0.0124	0.0018	1067853	0.0117522	0.054547	0.0990279	4.64141	8.4263	0.678908	-1.02264e-09	2.05553e-08	-0.0497506	0.519839	0.284131	no
Inhibitory PV	Inhibitory neurons	Alzheimers	0.0124	0.0018	1067853	0.00784092	0.0280798	0.0934169	3.58118	11.914	0.834127	-2.38036e-09	2.87008e-08	-0.0829371	0.533049	0.273233	no
Excitatory Camk2a	Excitatory neurons	Alzheimers	0.0124	0.0018	1067853	0.00981973	0.0186623	0.088955	1.90049	9.0588	0.921953	-2.06749e-09	2.05365e-08	-0.100674	0.540095	0.26753	no
Excitatory Layer V	Excitatory neurons	Alzheimers	0.0124	0.0018	1067853	0.0127519	0.0530445	0.0897185	4.15974	7.03571	0.664004	-1.69803e-09	1.65051e-08	-0.102879	0.54097	0.266827	no
Excitatory Layer IV	Excitatory neurons	Alzheimers	0.0124	0.0018	1067853	0.0126719	0.0433082	0.0998235	3.41766	7.87757	0.767526	-3.13384e-09	1.90407e-08	-0.164587	0.565365	0.247671	no
Embryonic DA forebrain	Dopaminergic neurons	Alzheimers	0.0124	0.0018	1067853	0.00805867	0.0354857	0.0619171	4.40342	7.6833	0.654411	-3.46304e-09	1.78545e-08	-0.193958	0.576896	0.238903	no
Inhibitory Gad2	Inhibitory neurons	Alzheimers	0.0124	0.0018	1067853	0.0116855	0.0231473	0.0908164	1.98086	7.77174	0.900796	-8.35109e-09	1.86291e-08	-0.448282	0.673025	0.171969	no
Excitatory DG*	Excitatory neurons	Alzheimers	0.0124	0.0018	1067853	0.0117309	-0.0252727	0.125638	-2.15437	10.71	0.771328	-1.25828e-08	2.42516e-08	-0.518846	0.698066	0.156104	no
CD8 T-cells human	T-cells	Alzheimers	0.0125	0.0017	1067853	0.00809037	-0.0503676	0.171777	-6.22562	21.2322	0.738928	-3.88377e-08	6.35335e-08	-0.611295	0.729498	0.136976	no
Cones (blue)	Retina cells	Alzheimers	0.0124	0.0018	1067853	0.0055412	-0.0120495	0.0800928	-2.17452	14.454	0.827527	-2.20064e-08	3.54682e-08	-0.620452	0.73252	0.135181	no
Rods	Retina cells	Alzheimers	0.0124	0.0018	1067853	0.00423844	-0.00290369	0.050677	-0.685086	11.9565	0.887711	-2.03452e-08	2.77001e-08	-0.73448	0.768672	0.114259	no
Inhibitory VIP	Inhibitory neurons	Alzheimers	0.0124	0.0018	1067853	0.00863406	-0.0629624	0.116738	-7.29233	13.5206	0.53749	-2.65825e-08	3.11274e-08	-0.853989	0.803444	0.0950442	no
Excitatory Layer VI*	Excitatory neurons	Alzheimers	0.0123	0.0018	1067853	0.00682871	-0.0928445	0.120749	-13.5962	17.6825	0.404504	-3.93923e-08	3.89049e-08	-1.01253	0.844357	0.0734737	no
CD4 T-cells human	T-cells	Alzheimers	0.0126	0.0017	1067853	0.00794711	-0.153166	0.175735	-19.2731	22.1131	0.354001	-7.84741e-08	6.49536e-08	-1.20816	0.886506	0.0523182	no
Excitatory Layer VI	Excitatory neurons	Alzheimers	0.0123	0.0018	1067853	0.0129299	-0.0836657	0.114368	-6.47073	8.84522	0.392383	-2.80416e-08	2.00754e-08	-1.39681	0.918765	0.0367958	no
CD8 T-cells	T-cells	Alzheimers	0.0124	0.0018	1067853	0.00675305	-0.0725654	0.0699781	-10.7456	10.3624	0.24323	-4.49975e-08	2.44462e-08	-1.84067	0.967165	0.0144994	no
CD4 T-cells	T-cells	Alzheimers	0.0124	0.0018	1067853	0.00689899	-0.104449	0.0734988	-15.1398	10.6535	0.115792	-5.40105e-08	2.45515e-08	-2.19988	0.986092	0.00608236	no

## Sheet: Anorexia
cell.population	type	phenotype	h2	h2_se	n_snps	Prop._SNPs	Prop._h2	Prop._h2_std_error	Enrichment	Enrichment_std_error	Enrichment_p	Coefficient	Coefficient_std_error	Coefficient_z-score	p	p.log10	signif.all
Excitatory Layers II-III	Excitatory neurons	Anorexia	0.1868	0.0173	931087	0.0117522	0.19542	0.05164	16.6283	4.39406	0.000388247	5.03624e-07	1.37681e-07	3.65791	0.00012714	3.89572	no
Excitatory Layer IV	Excitatory neurons	Anorexia	0.187	0.0172	931087	0.0126719	0.198437	0.0553687	15.6596	4.36942	0.000707624	4.66917e-07	1.38524e-07	3.37065	0.000374957	3.42602	no
Cones (green)	Retina cells	Anorexia	0.1847	0.0172	931087	0.00576415	0.132712	0.0449172	23.0237	7.79252	0.00400762	7.11107e-07	2.52175e-07	2.8199	0.00240196	2.61943	no
Inhibitory Gad2	Inhibitory neurons	Anorexia	0.1859	0.0173	931087	0.0116855	0.168601	0.0534862	14.4283	4.57715	0.00317179	4.17171e-07	1.50529e-07	2.77137	0.00279106	2.55423	no
Excitatory Layer V	Excitatory neurons	Anorexia	0.186	0.0172	931087	0.0127519	0.171148	0.0576746	13.4214	4.52283	0.00501765	3.83842e-07	1.4013e-07	2.73918	0.00307967	2.5115	no
Cones (blue)	Retina cells	Anorexia	0.1843	0.0173	931087	0.0055412	0.128351	0.0461326	23.1629	8.32538	0.00644772	7.23483e-07	2.70298e-07	2.67661	0.00371851	2.42963	no
Excitatory Layer VI	Excitatory neurons	Anorexia	0.1867	0.0173	931087	0.0129299	0.174263	0.0571572	13.4776	4.42056	0.00519126	3.8774e-07	1.46435e-07	2.64787	0.00405006	2.39254	no
Inhibitory VIP	Inhibitory neurons	Anorexia	0.1852	0.0173	931087	0.00863406	0.150774	0.0514563	17.4627	5.95969	0.0066767	5.00539e-07	2.06729e-07	2.42124	0.00773386	2.1116	no
Excitatory Layers II-V*	Excitatory neurons	Anorexia	0.1853	0.0173	931087	0.0113152	0.140226	0.0539689	12.3927	4.76958	0.0187584	3.36529e-07	1.54765e-07	2.17445	0.0148357	1.82869	no
Excitatory Layer VI*	Excitatory neurons	Anorexia	0.1853	0.0173	931087	0.00682871	0.112298	0.0458331	16.445	6.71183	0.0231514	4.64901e-07	2.17535e-07	2.13714	0.0162934	1.78799	no
Rods	Retina cells	Anorexia	0.1835	0.0173	931087	0.00423844	0.084911	0.038041	20.0336	8.97524	0.0288699	5.99948e-07	2.82621e-07	2.1228	0.0168852	1.77249	no
Microglia*	Glia	Anorexia	0.1844	0.0173	931087	0.00627143	0.100025	0.0460042	15.9493	7.33551	0.0469111	4.57582e-07	2.40849e-07	1.89987	0.0287252	1.54174	no
NeuN negative	Glia	Anorexia	0.1846	0.0173	931087	0.00717159	0.1026	0.0446609	14.3065	6.22748	0.0340248	3.87283e-07	2.05835e-07	1.88152	0.0299503	1.5236	no
Inhibitory*	Inhibitory neurons	Anorexia	0.1848	0.0173	931087	0.00623486	0.0941556	0.0476584	15.1015	7.64386	0.0653676	4.16883e-07	2.41822e-07	1.72393	0.0423602	1.37304	no
Inhibitory PV	Inhibitory neurons	Anorexia	0.1844	0.0173	931087	0.00784092	0.0990531	0.0461605	12.6328	5.88713	0.051238	3.32225e-07	2.0095e-07	1.65327	0.0491379	1.30858	no
Oligodendrocytes*	Glia	Anorexia	0.1845	0.0172	931087	0.0057566	0.0818195	0.0463759	14.2132	8.05613	0.0984054	3.83757e-07	2.58008e-07	1.48739	0.0684563	1.16459	no
CD4 T-cells	T-cells	Anorexia	0.1838	0.0173	931087	0.00689899	0.0723658	0.0444188	10.4893	6.43845	0.136249	2.67535e-07	2.02384e-07	1.32192	0.0930973	1.03106	no
Inhibitory MSN*	Inhibitory neurons	Anorexia	0.185	0.0174	931087	0.00761295	0.0840091	0.0512451	11.035	6.7313	0.141233	2.84017e-07	2.1585e-07	1.31581	0.0941193	1.02632	no
Excitatory Camk2a	Excitatory neurons	Anorexia	0.1844	0.0173	931087	0.00981973	0.0888358	0.0519581	9.04666	5.29119	0.136114	2.11514e-07	1.72792e-07	1.2241	0.110458	0.956803	no
CD8 T-cells human	T-cells	Anorexia	0.1833	0.0173	931087	0.00809037	0.0665585	0.0507598	8.22688	6.27409	0.241207	2.38012e-07	2.25367e-07	1.05611	0.145459	0.837258	no
Excitatory DG*	Excitatory neurons	Anorexia	0.1846	0.0174	931087	0.0117309	0.0838634	0.0572953	7.14891	4.88412	0.216097	1.5586e-07	1.62128e-07	0.96134	0.168191	0.774198	no
CD8 T-cells	T-cells	Anorexia	0.1838	0.0173	931087	0.00675305	0.0539798	0.0434975	7.99339	6.44117	0.271762	1.77521e-07	2.01801e-07	0.879682	0.189516	0.722355	no
Embryonic DA midbrain	Dopaminergic neurons	Anorexia	0.1844	0.0174	931087	0.00795265	0.0619559	0.043679	7.7906	5.49238	0.223466	1.65901e-07	1.90658e-07	0.870149	0.192109	0.716451	no
CD4 T-cells human	T-cells	Anorexia	0.1835	0.0173	931087	0.00794711	0.046012	0.0467481	5.78978	5.88241	0.412112	1.28682e-07	2.16053e-07	0.595603	0.27572	0.559531	no
Microglia	Glia	Anorexia	0.1839	0.0173	931087	0.00740712	0.0347386	0.0458844	4.6899	6.19464	0.549915	6.62809e-08	2.17915e-07	0.30416	0.380503	0.419642	no
Embryonic DA forebrain	Dopaminergic neurons	Anorexia	0.1839	0.0173	931087	0.00805867	0.0332902	0.0456492	4.13098	5.6646	0.583557	1.83523e-08	1.87649e-07	0.0978011	0.461045	0.336257	no
Astrocytes*	Glia	Anorexia	0.1832	0.0173	931087	0.00717142	-0.0204898	0.0490074	-2.85714	6.8337	0.570764	-1.98048e-07	2.155e-07	-0.919015	0.820956	0.0856801	no

## Sheet: Asthma
cell.population	type	phenotype	h2	h2_se	n_snps	Prop._SNPs	Prop._h2	Prop._h2_std_error	Enrichment	Enrichment_std_error	Enrichment_p	Coefficient	Coefficient_std_error	Coefficient_z-score	p	p.log10	signif.all
CD8 T-cells	T-cells	Asthma	0.0595	0.0048	1054100	0.00675305	0.246347	0.0467894	36.4794	6.92864	5.28888e-06	3.51746e-07	8.66407e-08	4.05982	2.45549e-05	4.60986	yes
CD4 T-cells	T-cells	Asthma	0.0595	0.0048	1054100	0.00689899	0.252426	0.0528858	36.5887	7.66573	2.68142e-05	3.51431e-07	9.52913e-08	3.68796	0.000113028	3.94681	no
CD8 T-cells human	T-cells	Asthma	0.0593	0.0048	1054100	0.00809037	0.170338	0.0320132	21.0544	3.95694	6.47976e-07	1.77212e-07	5.61138e-08	3.15808	0.000794047	3.10015	no
CD4 T-cells human	T-cells	Asthma	0.0591	0.0048	1054100	0.00794711	0.216918	0.0497588	27.2952	6.26124	2.70735e-05	2.63514e-07	9.12196e-08	2.88878	0.00193367	2.71362	no
Microglia	Glia	Asthma	0.0597	0.0048	1054100	0.00740712	0.156792	0.0396587	21.1678	5.35414	0.000793858	1.8265e-07	6.92458e-08	2.63771	0.00417345	2.3795	no
Excitatory Layer VI	Excitatory neurons	Asthma	0.0598	0.0049	1054100	0.0129299	0.0702105	0.0299597	5.4301	2.31709	0.0545494	1.28026e-08	2.26124e-08	0.566177	0.285637	0.544186	no
Rods	Retina cells	Asthma	0.0597	0.0048	1054100	0.00423844	0.0244849	0.028866	5.77687	6.81052	0.478984	3.46402e-09	7.76269e-08	0.0446239	0.482204	0.31677	no
Excitatory Layer VI*	Excitatory neurons	Asthma	0.0597	0.0048	1054100	0.00682871	0.02863	0.0219504	4.1926	3.21443	0.308532	2.90995e-10	3.14763e-08	0.00924487	0.496312	0.304245	no
Inhibitory*	Inhibitory neurons	Asthma	0.0597	0.0048	1054100	0.00623486	0.020934	0.026747	3.35757	4.28991	0.577391	-9.69208e-09	4.19421e-08	-0.231082	0.591375	0.228137	no
Excitatory Layer IV	Excitatory neurons	Asthma	0.0597	0.0049	1054100	0.0126719	0.0484679	0.0265979	3.82484	2.09898	0.179825	-5.63803e-09	2.26112e-08	-0.249347	0.598454	0.222969	no
Microglia*	Glia	Asthma	0.0597	0.0048	1054100	0.00627143	0.0288861	0.0279763	4.60598	4.46091	0.405435	-1.34505e-08	4.41988e-08	-0.304318	0.619557	0.207919	no
Cones (blue)	Retina cells	Asthma	0.0597	0.0049	1054100	0.0055412	0.0196825	0.0254941	3.55202	4.60083	0.57328	-1.76488e-08	4.92265e-08	-0.358523	0.640024	0.193804	no
Cones (green)	Retina cells	Asthma	0.0597	0.0048	1054100	0.00576415	0.0177205	0.0279247	3.07427	4.84455	0.663721	-2.14009e-08	5.09624e-08	-0.419935	0.662733	0.178661	no
Excitatory Layer V	Excitatory neurons	Asthma	0.0597	0.0049	1054100	0.0127519	0.0417634	0.026927	3.27508	2.11161	0.283072	-1.16684e-08	2.33166e-08	-0.500432	0.691615	0.160136	no
Oligodendrocytes*	Glia	Asthma	0.0597	0.0048	1054100	0.0057566	0.0187218	0.0227519	3.25223	3.95232	0.559337	-2.05216e-08	3.86559e-08	-0.530878	0.702248	0.153509	no
Inhibitory VIP	Inhibitory neurons	Asthma	0.0597	0.0049	1054100	0.00863406	0.0160853	0.0249133	1.863	2.88546	0.763644	-2.61094e-08	3.16492e-08	-0.824964	0.795304	0.0994669	no
Excitatory Layers II-III	Excitatory neurons	Asthma	0.0596	0.0049	1054100	0.0117522	0.0296488	0.0289831	2.52282	2.46618	0.53889	-2.3139e-08	2.69526e-08	-0.858507	0.804694	0.0943694	no
Inhibitory Gad2	Inhibitory neurons	Asthma	0.0596	0.0049	1054100	0.0116855	0.0231068	0.0315296	1.97739	2.69819	0.716523	-3.07438e-08	3.15584e-08	-0.974189	0.835019	0.0783039	no
Excitatory DG*	Excitatory neurons	Asthma	0.0596	0.0049	1054100	0.0117309	0.0108344	0.030368	0.923578	2.58871	0.97621	-3.10664e-08	2.81434e-08	-1.10386	0.865173	0.062897	no
Excitatory Layers II-V*	Excitatory neurons	Asthma	0.0596	0.0049	1054100	0.0113152	0.00983042	0.0308211	0.868777	2.72386	0.961272	-3.42383e-08	3.03029e-08	-1.12987	0.870734	0.0601146	no
Embryonic DA midbrain	Dopaminergic neurons	Asthma	0.0596	0.0049	1054100	0.00795265	0.0116371	0.0264115	1.4633	3.3211	0.888363	-5.20422e-08	3.78536e-08	-1.37483	0.915407	0.0383856	no
NeuN negative	Glia	Asthma	0.0597	0.0048	1054100	0.00717159	0.00472786	0.0204529	0.659248	2.85194	0.904739	-4.04542e-08	2.78463e-08	-1.45277	0.926856	0.032988	no
Astrocytes*	Glia	Asthma	0.0596	0.0048	1054100	0.00717142	0.00131766	0.0237951	0.183737	3.31805	0.80536	-5.01269e-08	3.36232e-08	-1.49084	0.931998	0.0305848	no
Inhibitory PV	Inhibitory neurons	Asthma	0.0597	0.0049	1054100	0.00784092	-0.00877328	0.0255634	-1.11891	3.26026	0.519816	-6.14118e-08	3.56258e-08	-1.7238	0.957628	0.0188031	no
Embryonic DA forebrain	Dopaminergic neurons	Asthma	0.0597	0.0049	1054100	0.00805867	0.00749989	0.0234957	0.930662	2.91559	0.980972	-5.76459e-08	3.23139e-08	-1.78394	0.962783	0.0164716	no
Excitatory Camk2a	Excitatory neurons	Asthma	0.0597	0.0049	1054100	0.00981973	-0.0139474	0.0257249	-1.42034	2.61971	0.358872	-5.08935e-08	2.75481e-08	-1.84744	0.967658	0.014278	no
Inhibitory MSN*	Inhibitory neurons	Asthma	0.0595	0.0048	1054100	0.00761295	-0.0135172	0.0241569	-1.77556	3.17313	0.391115	-7.35042e-08	3.17141e-08	-2.31771	0.989767	0.00446682	no

## Sheet: Autism
cell.population	type	phenotype	h2	h2_se	n_snps	Prop._SNPs	Prop._h2	Prop._h2_std_error	Enrichment	Enrichment_std_error	Enrichment_p	Coefficient	Coefficient_std_error	Coefficient_z-score	p	p.log10	signif.all
Inhibitory VIP	Inhibitory neurons	Autism	0.4477	0.0527	1067407	0.00863406	0.208525	0.0612797	24.1514	7.09744	0.0010111	1.75116e-06	5.72541e-07	3.05858	0.00111195	2.95392	no
Excitatory Layers II-III	Excitatory neurons	Autism	0.4492	0.0529	1067407	0.0117522	0.174615	0.0607165	14.858	5.16637	0.00757185	1.05392e-06	4.20852e-07	2.50426	0.00613539	2.21216	no
Excitatory Layer VI	Excitatory neurons	Autism	0.4489	0.0528	1067407	0.0129299	0.149325	0.0608619	11.5488	4.70708	0.0265297	7.66345e-07	3.70433e-07	2.06878	0.0192834	1.71482	no
Embryonic DA midbrain	Dopaminergic neurons	Autism	0.447	0.0528	1067407	0.00795265	0.121079	0.0550915	15.2249	6.92744	0.0376371	1.10653e-06	5.69779e-07	1.94204	0.0260663	1.58392	no
Inhibitory MSN*	Inhibitory neurons	Autism	0.4479	0.053	1067407	0.00761295	0.131265	0.0568431	17.2423	7.46663	0.0318005	1.17548e-06	6.13439e-07	1.91622	0.0276688	1.55801	no
Cones (green)	Retina cells	Autism	0.4453	0.0527	1067407	0.00576415	0.103126	0.0518192	17.8909	8.98992	0.0648387	1.26296e-06	7.62346e-07	1.65668	0.0487921	1.31165	no
Excitatory Layer VI*	Excitatory neurons	Autism	0.4469	0.0528	1067407	0.00682871	0.112702	0.0564413	16.5042	8.2653	0.0645608	1.09403e-06	6.71176e-07	1.63003	0.0515481	1.28779	no
Inhibitory Gad2	Inhibitory neurons	Autism	0.4471	0.0532	1067407	0.0116855	0.132507	0.0635353	11.3394	5.43711	0.0689699	7.15931e-07	4.61416e-07	1.5516	0.0603795	1.21911	no
Rods	Retina cells	Autism	0.4434	0.0525	1067407	0.00423844	0.0716318	0.0427956	16.9005	10.097	0.117906	1.17577e-06	7.99367e-07	1.47088	0.0706617	1.15082	no
Microglia*	Glia	Autism	0.4452	0.0527	1067407	0.00627143	0.0988635	0.0571724	15.7641	9.11632	0.109635	1.07712e-06	7.56041e-07	1.42468	0.0771245	1.11281	no
Excitatory Layer V	Excitatory neurons	Autism	0.4468	0.053	1067407	0.0127519	0.12247	0.0639094	9.60409	5.01177	0.0926241	5.82752e-07	4.12417e-07	1.41301	0.0788257	1.10333	no
Inhibitory*	Inhibitory neurons	Autism	0.4459	0.0529	1067407	0.00623486	0.0901293	0.0508767	14.4557	8.16004	0.107062	9.19933e-07	6.53236e-07	1.40827	0.0795255	1.09949	no
Excitatory DG*	Excitatory neurons	Autism	0.4468	0.0528	1067407	0.0117309	0.129702	0.0674104	11.0564	5.74638	0.0826567	6.57744e-07	4.70012e-07	1.39942	0.0808437	1.09235	no
Excitatory Layer IV	Excitatory neurons	Autism	0.4473	0.053	1067407	0.0126719	0.119195	0.0614484	9.40624	4.8492	0.0884041	5.68439e-07	4.06923e-07	1.39692	0.0812186	1.09034	no
Excitatory Layers II-V*	Excitatory neurons	Autism	0.446	0.0528	1067407	0.0113152	0.110975	0.0652261	9.80754	5.76444	0.130582	5.68121e-07	4.63034e-07	1.22695	0.10992	0.958924	no
Microglia	Glia	Autism	0.4443	0.0527	1067407	0.00740712	0.0868025	0.0579863	11.7188	7.82845	0.173687	7.74785e-07	6.40605e-07	1.20946	0.113243	0.945988	no
Embryonic DA forebrain	Dopaminergic neurons	Autism	0.4453	0.0528	1067407	0.00805867	0.0894642	0.0566684	11.1016	7.03199	0.150704	7.15701e-07	5.92483e-07	1.20797	0.11353	0.944891	no
Cones (blue)	Retina cells	Autism	0.4444	0.0527	1067407	0.0055412	0.0678397	0.0488779	12.2428	8.82081	0.208305	7.74492e-07	7.2501e-07	1.06825	0.142704	0.845564	no
Inhibitory PV	Inhibitory neurons	Autism	0.4447	0.0527	1067407	0.00784092	0.0778574	0.0564819	9.92962	7.20347	0.207197	5.69137e-07	5.67639e-07	1.00264	0.158017	0.801295	no
NeuN negative	Glia	Autism	0.445	0.0527	1067407	0.00717159	0.0782411	0.0614896	10.9099	8.57405	0.242798	6.5533e-07	6.71826e-07	0.975446	0.164669	0.783387	no
CD8 T-cells	T-cells	Autism	0.4438	0.0527	1067407	0.00675305	0.0317655	0.0522996	4.70388	7.74459	0.629679	1.59051e-07	5.92869e-07	0.268273	0.394245	0.404234	no
Excitatory Camk2a	Excitatory neurons	Autism	0.4441	0.0527	1067407	0.00981973	0.0441481	0.0561263	4.49585	5.71567	0.538717	1.18231e-07	4.41192e-07	0.26798	0.394357	0.40411	no
CD8 T-cells human	T-cells	Autism	0.4435	0.0526	1067407	0.00809037	0.0332202	0.0533747	4.10614	6.59732	0.638197	1.4777e-07	5.85194e-07	0.252514	0.400322	0.397591	no
CD4 T-cells human	T-cells	Autism	0.4436	0.0525	1067407	0.00794711	0.0301854	0.0529097	3.79828	6.65773	0.674751	1.20302e-07	5.86902e-07	0.204978	0.418795	0.377999	no
Astrocytes*	Glia	Autism	0.444	0.0528	1067407	0.00717142	0.0254696	0.0512261	3.55154	7.14309	0.721567	2.41112e-08	5.63319e-07	0.042802	0.48293	0.316116	no
Oligodendrocytes*	Glia	Autism	0.4438	0.0526	1067407	0.0057566	0.0136218	0.0491049	2.3663	8.5302	0.872497	-7.23879e-08	6.81482e-07	-0.106221	0.542297	0.265763	no
CD4 T-cells	T-cells	Autism	0.4439	0.0527	1067407	0.00689899	-0.00785738	0.0497381	-1.13892	7.20947	0.767172	-3.45736e-07	5.53502e-07	-0.624634	0.733895	0.134366	no

## Sheet: Autoimmune traits
cell.population	type	phenotype	h2	h2_se	n_snps	Prop._SNPs	Prop._h2	Prop._h2_std_error	Enrichment	Enrichment_std_error	Enrichment_p	Coefficient	Coefficient_std_error	Coefficient_z-score	p	p.log10	signif.all
CD4 T-cells human	T-cells	Autoimmune traits	0.0374	0.0029	1054097	0.00794711	0.336663	0.0508435	42.3629	6.39774	1.63249e-08	2.58185e-07	5.81711e-08	4.43836	4.53225e-06	5.34369	yes
CD8 T-cells human	T-cells	Autoimmune traits	0.0377	0.003	1054097	0.00809037	0.273068	0.0426327	33.7522	5.26956	4.84546e-09	1.84811e-07	4.36425e-08	4.23465	1.14454e-05	4.94137	yes
CD8 T-cells	T-cells	Autoimmune traits	0.0379	0.003	1054097	0.00675305	0.28463	0.0527649	42.1484	7.81349	1.91945e-06	2.42128e-07	6.2688e-08	3.86244	5.61301e-05	4.2508	no
CD4 T-cells	T-cells	Autoimmune traits	0.0379	0.003	1054097	0.00689899	0.286575	0.0557367	41.5387	8.07897	8.5575e-06	2.37693e-07	6.54919e-08	3.62935	0.000142069	3.8475	no
Microglia	Glia	Autoimmune traits	0.0381	0.003	1054097	0.00740712	0.210772	0.0420357	28.4553	5.67505	1.07141e-05	1.51277e-07	4.46989e-08	3.38434	0.000356745	3.44764	no
Microglia*	Glia	Autoimmune traits	0.0381	0.003	1054097	0.00627143	0.115997	0.0321789	18.4961	5.13103	0.00111473	7.01832e-08	3.75809e-08	1.86752	0.0309143	1.50984	no
Cones (green)	Retina cells	Autoimmune traits	0.0381	0.003	1054097	0.00576415	0.0883565	0.0372387	15.3286	6.4604	0.0283283	5.3001e-08	4.71902e-08	1.12314	0.13069	0.883759	no
Excitatory Layers II-V*	Excitatory neurons	Autoimmune traits	0.0381	0.003	1054097	0.0113152	0.095563	0.0397746	8.4455	3.51514	0.0362166	1.92558e-08	2.40524e-08	0.800577	0.211688	0.674303	no
Cones (blue)	Retina cells	Autoimmune traits	0.0381	0.003	1054097	0.0055412	0.066801	0.0315682	12.0553	5.69699	0.0562205	2.57338e-08	4.19951e-08	0.612781	0.27001	0.568619	no
Rods	Retina cells	Autoimmune traits	0.0381	0.003	1054097	0.00423844	0.0591201	0.0297666	13.9486	7.02302	0.0676321	3.15416e-08	5.15424e-08	0.611955	0.270284	0.56818	no
Oligodendrocytes*	Glia	Autoimmune traits	0.0381	0.003	1054097	0.0057566	0.0612433	0.0267079	10.6388	4.63952	0.0365059	1.84441e-08	3.24746e-08	0.567953	0.285033	0.545104	no
Inhibitory*	Inhibitory neurons	Autoimmune traits	0.0381	0.003	1054097	0.00623486	0.0531504	0.0256191	8.52471	4.10901	0.0667763	1.21405e-08	2.67863e-08	0.453234	0.32519	0.487863	no
Excitatory Layers II-III	Excitatory neurons	Autoimmune traits	0.0381	0.003	1054097	0.0117522	0.0899804	0.0366899	7.65645	3.12195	0.0333395	7.66864e-09	2.18922e-08	0.350291	0.36306	0.440021	no
Inhibitory PV	Inhibitory neurons	Autoimmune traits	0.0381	0.003	1054097	0.00784092	0.061288	0.0320614	7.81643	4.08899	0.0898405	5.64778e-09	2.78349e-08	0.202903	0.419606	0.377159	no
NeuN negative	Glia	Autoimmune traits	0.0381	0.003	1054097	0.00717159	0.051563	0.0282145	7.18989	3.9342	0.108336	3.97152e-09	2.56416e-08	0.154886	0.438456	0.358074	no
Excitatory Camk2a	Excitatory neurons	Autoimmune traits	0.0381	0.003	1054097	0.00981973	0.0520256	0.0307659	5.29807	3.13306	0.164232	2.81149e-09	2.00171e-08	0.140454	0.444151	0.35247	no
Embryonic DA midbrain	Dopaminergic neurons	Autoimmune traits	0.0381	0.003	1054097	0.00795265	0.0791488	0.0313004	9.95251	3.93585	0.0229264	4.01488e-09	2.89731e-08	0.138573	0.444894	0.351744	no
Excitatory Layer V	Excitatory neurons	Autoimmune traits	0.0381	0.003	1054097	0.0127519	0.0834091	0.0366553	6.54092	2.8745	0.0557133	2.35695e-09	2.02497e-08	0.116394	0.45367	0.34326	no
Excitatory Layer VI*	Excitatory neurons	Autoimmune traits	0.0381	0.003	1054097	0.00682871	0.0426142	0.0288458	6.24046	4.2242	0.214449	-2.11323e-09	2.81155e-08	-0.0751624	0.529957	0.275759	no
Inhibitory Gad2	Inhibitory neurons	Autoimmune traits	0.038	0.003	1054097	0.0116855	0.0676714	0.0380715	5.79107	3.25802	0.14724	-6.64175e-09	2.44146e-08	-0.27204	0.607204	0.216665	no
Excitatory Layer IV	Excitatory neurons	Autoimmune traits	0.038	0.003	1054097	0.0126719	0.0579786	0.0359054	4.57538	2.83347	0.206177	-1.26471e-08	1.96133e-08	-0.644826	0.74048	0.130487	no
Excitatory DG*	Excitatory neurons	Autoimmune traits	0.038	0.003	1054097	0.0117309	0.0442547	0.0309649	3.77248	2.63959	0.29766	-1.12323e-08	1.73958e-08	-0.645692	0.740761	0.130322	no
Inhibitory MSN*	Inhibitory neurons	Autoimmune traits	0.038	0.003	1054097	0.00761295	0.0354972	0.0315921	4.66273	4.14978	0.365244	-1.86597e-08	2.79712e-08	-0.667105	0.747647	0.126303	no
Embryonic DA forebrain	Dopaminergic neurons	Autoimmune traits	0.038	0.003	1054097	0.00805867	0.0540443	0.0307663	6.70636	3.81779	0.131399	-2.15853e-08	2.70637e-08	-0.797573	0.787441	0.103782	no
Excitatory Layer VI	Excitatory neurons	Autoimmune traits	0.038	0.003	1054097	0.0129299	0.0535253	0.0369665	4.13966	2.859	0.269115	-1.57187e-08	1.89338e-08	-0.830193	0.796785	0.0986587	no
Astrocytes*	Glia	Autoimmune traits	0.0379	0.003	1054097	0.00717142	-0.00370321	0.0312348	-0.516385	4.35546	0.727987	-5.35911e-08	2.96411e-08	-1.808	0.964697	0.0156091	no
Inhibitory VIP	Inhibitory neurons	Autoimmune traits	0.038	0.003	1054097	0.00863406	0.00772738	0.0280359	0.894989	3.24712	0.974191	-4.15714e-08	2.25203e-08	-1.84595	0.967551	0.0143263	no

## Sheet: Balding type I
cell.population	type	phenotype	h2	h2_se	n_snps	Prop._SNPs	Prop._h2	Prop._h2_std_error	Enrichment	Enrichment_std_error	Enrichment_p	Coefficient	Coefficient_std_error	Coefficient_z-score	p	p.log10	signif.all
Cones (blue)	Retina cells	Balding type I	0.2045	0.0155	1053633	0.0055412	0.0592238	0.026325	10.6879	4.75077	0.0424307	2.1509e-07	1.72615e-07	1.24606	0.10637	0.97318	no
Rods	Retina cells	Balding type I	0.2044	0.0155	1053633	0.00423844	0.0428371	0.0229164	10.1068	5.4068	0.0969401	2.01574e-07	2.03117e-07	0.992406	0.1605	0.794526	no
CD8 T-cells	T-cells	Balding type I	0.2043	0.0155	1053633	0.00675305	0.0769408	0.04573	11.3935	6.77176	0.124407	2.52008e-07	2.71452e-07	0.928371	0.176608	0.75299	no
CD4 T-cells	T-cells	Balding type I	0.2044	0.0156	1053633	0.00689899	0.0592217	0.0448547	8.58411	6.50164	0.241267	1.45389e-07	2.54502e-07	0.571268	0.283909	0.546821	no
Cones (green)	Retina cells	Balding type I	0.2045	0.0156	1053633	0.00576415	0.0377259	0.0270681	6.54492	4.69594	0.23694	4.94386e-08	1.75025e-07	0.282466	0.388793	0.410281	no
Astrocytes*	Glia	Balding type I	0.2044	0.0156	1053633	0.00717142	0.028795	0.0333457	4.01525	4.6498	0.515684	-4.33738e-08	1.64672e-07	-0.263395	0.603877	0.219052	no
Microglia*	Glia	Balding type I	0.2045	0.0155	1053633	0.00627143	0.0145936	0.0269092	2.327	4.29076	0.75567	-8.6167e-08	1.47664e-07	-0.583535	0.720233	0.142527	no
Microglia	Glia	Balding type I	0.2045	0.0156	1053633	0.00740712	0.0170607	0.0273408	2.30328	3.69115	0.723634	-1.21408e-07	1.43445e-07	-0.846372	0.801327	0.09619	no
CD8 T-cells human	T-cells	Balding type I	0.205	0.0155	1053633	0.00809037	0.000576602	0.0418772	0.0712702	5.17617	0.857301	-2.67776e-07	2.08329e-07	-1.28535	0.900665	0.0454366	no
Oligodendrocytes*	Glia	Balding type I	0.2044	0.0155	1053633	0.0057566	-0.00887278	0.024131	-1.54132	4.19188	0.542631	-2.54446e-07	1.53118e-07	-1.66176	0.951719	0.021491	no
Excitatory Layer IV	Excitatory neurons	Balding type I	0.2036	0.0155	1053633	0.0126719	-0.0238236	0.0396089	-1.88004	3.12574	0.356686	-2.77736e-07	1.07462e-07	-2.5845	0.995124	0.00212278	no
Embryonic DA midbrain	Dopaminergic neurons	Balding type I	0.2042	0.0155	1053633	0.00795265	-0.0131827	0.0277379	-1.65766	3.48789	0.447861	-3.54242e-07	1.3583e-07	-2.60799	0.995446	0.00198219	no
CD4 T-cells human	T-cells	Balding type I	0.2056	0.0155	1053633	0.00794711	-0.0401242	0.0367301	-5.0489	4.62182	0.190637	-5.1716e-07	1.95428e-07	-2.64629	0.995931	0.00177077	no
Excitatory Layers II-III	Excitatory neurons	Balding type I	0.2037	0.0155	1053633	0.0117522	-0.031759	0.0390461	-2.70238	3.32244	0.267857	-3.16839e-07	1.17569e-07	-2.69491	0.99648	0.00153157	no
Inhibitory MSN*	Inhibitory neurons	Balding type I	0.2038	0.0155	1053633	0.00761295	-0.036319	0.0261411	-4.77069	3.43377	0.103357	-3.7934e-07	1.36145e-07	-2.7863	0.997334	0.00115922	no
Embryonic DA forebrain	Dopaminergic neurons	Balding type I	0.2044	0.0155	1053633	0.00805867	-0.0312502	0.0277534	-3.87783	3.44392	0.162695	-4.47012e-07	1.47545e-07	-3.02966	0.998776	0.000531971	no
Excitatory Camk2a	Excitatory neurons	Balding type I	0.2046	0.0156	1053633	0.00981973	-0.0664024	0.0355962	-6.76214	3.62497	0.0350777	-4.29787e-07	1.27471e-07	-3.37163	0.999626	0.000162291	no
Inhibitory PV	Inhibitory neurons	Balding type I	0.2044	0.0155	1053633	0.00784092	-0.0503519	0.0282132	-6.42168	3.5982	0.0467366	-4.74057e-07	1.36111e-07	-3.48287	0.999752	0.000107732	no
Excitatory Layers II-V*	Excitatory neurons	Balding type I	0.2037	0.0155	1053633	0.0113152	-0.0612468	0.034342	-5.41277	3.03502	0.0362568	-3.81828e-07	1.06325e-07	-3.59115	0.999835	7.14968e-05	no
NeuN negative	Glia	Balding type I	0.2045	0.0155	1053633	0.00717159	-0.0514094	0.0241529	-7.16848	3.36785	0.0173526	-4.57339e-07	1.18885e-07	-3.84692	0.99994	2.59747e-05	no
Inhibitory VIP	Inhibitory neurons	Balding type I	0.2039	0.0155	1053633	0.00863406	-0.0798584	0.0343771	-9.24923	3.98157	0.01321	-6.00161e-07	1.52783e-07	-3.92818	0.999957	1.8586e-05	no
Inhibitory Gad2	Inhibitory neurons	Balding type I	0.2031	0.0154	1053633	0.0116855	-0.0683849	0.0330805	-5.85212	2.8309	0.0219656	-4.79518e-07	1.15769e-07	-4.14202	0.999983	7.4755e-06	no
Excitatory Layer V	Excitatory neurons	Balding type I	0.2032	0.0154	1053633	0.0127519	-0.0759417	0.035591	-5.95533	2.79104	0.0172535	-4.46028e-07	1.03839e-07	-4.29538	0.999991	3.7869e-06	no
Excitatory Layer VI*	Excitatory neurons	Balding type I	0.2037	0.0155	1053633	0.00682871	-0.074244	0.0253944	-10.8723	3.71877	0.00179817	-5.6922e-07	1.27269e-07	-4.47259	0.999996	1.67811e-06	no
Inhibitory*	Inhibitory neurons	Balding type I	0.2037	0.0155	1053633	0.00623486	-0.0805088	0.0237405	-12.9127	3.8077	0.00045236	-6.35817e-07	1.36168e-07	-4.66937	0.999998	6.56068e-07	no
Excitatory DG*	Excitatory neurons	Balding type I	0.2032	0.0154	1053633	0.0117309	-0.127596	0.0371335	-10.8769	3.16544	0.000421598	-5.83918e-07	1.18715e-07	-4.91865	1	1.89231e-07	no
Excitatory Layer VI	Excitatory neurons	Balding type I	0.2027	0.0154	1053633	0.0129299	-0.0800819	0.0320313	-6.19356	2.47731	0.00563824	-4.45129e-07	8.78348e-08	-5.06779	1	8.73931e-08	no

[truncated: 55 more sheets: Balding type IV, Basal metabolic rate, Bipolar disorder, Bipolar-SCZ vs. controls, BMI, Cardiovascular diseases, Celiac disease, Coronary artery disease, Crohn disease, Depressive symptoms, Diastolic blood pressure, Eczema, Education years, Eosinophil count, Epilepsy - all, Epilepsy - focal, Epilepsy - GGE, Ever smoked, Fasting glucose, Female age at first birth …]
