# Supplementary material for: Leveraging mouse chromatin data for heritability enrichment informs common disease architecture and reveals cortical layer contributions to schizophrenia
Source: HighWire-hosted journal article supplement (doi:10.1101/gr.256578.119), 2020-04-01
Supplement: Supplemental_Table_S7.xlsx [file Supplemental_Table_S7.xlsx]

## Sheet: README
Supplemental Table S7. The results from S-LDSC for SCZ CLOZUK GWAS for different subsets of peaks. Each tab contains the cell population (“cell.population”), the broad type of cell (“type”), which set of peaks were tested (“set”), the phenotype analyzed (“pheno”), the estimated disease heritability and standard error (“h2”, “h2_se”), the number of SNPs included in the analysis (“n_snps”), the pro…

## Sheet: All
cell.population	type	set	h2	h2_se	n_snps	Prop._SNPs	Prop._h2	Prop._h2_std_error	Enrichment	Enrichment_std_error	Enrichment_p	Coefficient	Coefficient_std_error	Coefficient_z-score	p	p.log10	signif.all
Excitatory Layers II-V*	Excitatory neurons	All	0.3568	0.0163	896549	0.0113152	0.249219	0.0251967	22.025	2.2268	2.56286e-17	1.23283e-06	1.4077e-07	8.75777	9.95796e-19	18.0018	yes
Excitatory Layer V	Excitatory neurons	All	0.3574	0.0162	896549	0.0127519	0.247356	0.0246817	19.3976	1.93553	1.03594e-17	1.09e-06	1.27586e-07	8.54331	6.52126e-18	17.1857	yes
Excitatory Layer IV	Excitatory neurons	All	0.3584	0.0164	896549	0.0126719	0.254516	0.0262663	20.0851	2.07281	3.98593e-16	1.13683e-06	1.4068e-07	8.08093	3.21382e-16	15.493	yes
Excitatory Layers II-III	Excitatory neurons	All	0.3573	0.0163	896549	0.0117522	0.24789	0.0258551	21.093	2.20002	3.88974e-16	1.20211e-06	1.50199e-07	8.00347	6.04791e-16	15.2184	yes
Excitatory Layer VI*	Excitatory neurons	All	0.3564	0.0163	896549	0.00682871	0.166033	0.0188107	24.314	2.75465	1.70888e-15	1.36251e-06	1.71029e-07	7.96654	8.15885e-16	15.0884	yes
Excitatory Layer VI	Excitatory neurons	All	0.3584	0.0164	896549	0.0129299	0.236451	0.0257068	18.2872	1.98817	2.48695e-15	1.01174e-06	1.33445e-07	7.58172	1.70496e-14	13.7683	yes
Inhibitory Gad2	Inhibitory neurons	All	0.3575	0.0164	896549	0.0116855	0.246241	0.0274863	21.0724	2.35218	4.66355e-14	1.19852e-06	1.66895e-07	7.18126	3.45353e-13	12.4617	yes
Excitatory DG*	Excitatory neurons	All	0.3568	0.0161	896549	0.0117309	0.250241	0.0314188	21.3317	2.67829	1.72456e-12	1.17308e-06	1.65216e-07	7.10027	6.22558e-13	12.2058	yes
Inhibitory*	Inhibitory neurons	All	0.3558	0.0163	896549	0.00623486	0.131235	0.018356	21.0485	2.94409	2.93852e-11	1.14209e-06	1.75449e-07	6.50955	3.76885e-11	10.4238	yes
Inhibitory MSN*	Inhibitory neurons	All	0.356	0.0164	896549	0.00761295	0.150258	0.019773	19.7372	2.59729	2.11114e-11	1.06494e-06	1.68855e-07	6.30684	1.42398e-10	9.8465	yes
Excitatory Camk2a	Excitatory neurons	All	0.3535	0.0163	896549	0.00981973	0.129291	0.0202412	13.1665	2.06127	5.73383e-09	6.47731e-07	1.21036e-07	5.35157	4.35973e-08	7.36054	yes
Inhibitory PV	Inhibitory neurons	All	0.3538	0.0163	896549	0.00784092	0.105309	0.0191281	13.4307	2.43952	4.50742e-07	6.35881e-07	1.53226e-07	4.14995	1.66271e-05	4.77918	yes
Astrocytes*	Glia	All	0.3555	0.0164	896549	0.00717142	0.100396	0.0206043	13.9994	2.87312	7.38309e-06	6.90413e-07	1.67913e-07	4.11174	1.96348e-05	4.70697	yes
Embryonic DA forebrain	Dopaminergic neurons	All	0.3537	0.0164	896549	0.00805867	0.11279	0.0196167	13.9962	2.43424	1.35604e-07	6.24228e-07	1.617e-07	3.8604	5.66e-05	4.24718	no
Inhibitory VIP	Inhibitory neurons	All	0.3544	0.0163	896549	0.00863406	0.103111	0.0189441	11.9424	2.19411	1.26331e-06	5.32424e-07	1.40867e-07	3.77963	7.85309e-05	4.10496	no
Microglia*	Glia	All	0.3539	0.0164	896549	0.00627143	0.0813436	0.0166386	12.9705	2.65308	7.46715e-06	6.54541e-07	1.74781e-07	3.74492	9.02264e-05	4.04467	no
Cones (green)	Retina cells	All	0.3541	0.0164	896549	0.00576415	0.0703283	0.0147524	12.201	2.55934	2.14866e-05	5.87419e-07	1.72782e-07	3.39978	0.000337205	3.47211	no
Embryonic DA midbrain	Dopaminergic neurons	All	0.3542	0.0164	896549	0.00795265	0.108853	0.0216023	13.6876	2.71637	4.06925e-06	6.10523e-07	1.81523e-07	3.36335	0.000385016	3.41452	no
Oligodendrocytes*	Glia	All	0.3541	0.0164	896549	0.0057566	0.0743622	0.0176607	12.9177	3.0679	0.000140269	6.20262e-07	1.85577e-07	3.34234	0.000415384	3.38155	no
Cones (blue)	Retina cells	All	0.3539	0.0164	896549	0.0055412	0.0584502	0.0152336	10.5483	2.74916	0.000532049	4.75082e-07	1.80294e-07	2.63504	0.00420641	2.37609	no
Rods	Retina cells	All	0.3537	0.0164	896549	0.00423844	0.0382832	0.0131634	9.03238	3.10572	0.0100667	3.76459e-07	2.07826e-07	1.81141	0.0350385	1.45545	no
CD8 T-cells	T-cells	All	0.3534	0.0165	896549	0.00675305	0.0616512	0.0250193	9.12938	3.70488	0.0263175	3.8103e-07	2.29485e-07	1.66037	0.0484197	1.31498	no
NeuN negative	Glia	All	0.3538	0.0164	896549	0.00717159	0.0486078	0.0179448	6.77783	2.5022	0.0211057	2.28633e-07	1.61587e-07	1.41492	0.0785453	1.10488	no
CD4 T-cells	T-cells	All	0.3536	0.0165	896549	0.00689899	0.0550516	0.0258541	7.97965	3.74752	0.0589512	3.11225e-07	2.28892e-07	1.3597	0.0869624	1.06067	no
Microglia	Glia	All	0.3539	0.0164	896549	0.00740712	0.0234716	0.0173382	3.16879	2.34074	0.351803	1.04018e-08	1.44235e-07	0.0721168	0.471254	0.326745	no
CD4 T-cells human	T-cells	All	0.3541	0.0164	896549	0.00794711	0.0211333	0.0201745	2.65925	2.5386	0.515103	-6.23892e-08	1.75396e-07	-0.355704	0.638969	0.19452	no
CD8 T-cells human	T-cells	All	0.3545	0.0164	896549	0.00809037	0.0063301	0.0198339	0.782424	2.45155	0.929307	-2.09492e-07	1.63646e-07	-1.28015	0.899754	0.0458763	no

## Sheet: Promoter only
cell.population	type	set	h2	h2_se	n_snps	Prop._SNPs	Prop._h2	Prop._h2_std_error	Enrichment	Enrichment_std_error	Enrichment_p	Coefficient	Coefficient_std_error	Coefficient_z-score	p	p.log10	signif.all
Excitatory Layer VI	Excitatory neurons	Promoter only	0.3523	0.0164	896549	0.00317757	0.0818197	0.0140317	25.7491	4.41586	1.46858e-08	1.53609e-06	3.01677e-07	5.09184	1.77302e-07	6.75129	yes
Excitatory Layer VI*	Excitatory neurons	Promoter only	0.3521	0.0163	896549	0.00176694	0.0596532	0.0119434	33.7607	6.75936	2.39526e-06	2.10398e-06	4.48857e-07	4.68741	1.38342e-06	5.85905	yes
Inhibitory Gad2	Inhibitory neurons	Promoter only	0.3523	0.0163	896549	0.00313748	0.084529	0.0149963	26.9417	4.77973	2.07366e-07	1.64779e-06	3.58704e-07	4.59373	2.17695e-06	5.66215	yes
Excitatory DG*	Excitatory neurons	Promoter only	0.3524	0.0164	896549	0.00229653	0.0623701	0.013335	27.1584	5.80657	6.57289e-06	1.6424e-06	3.69487e-07	4.44509	4.39278e-06	5.35726	yes
Inhibitory MSN*	Inhibitory neurons	Promoter only	0.3527	0.0164	896549	0.00211419	0.0593315	0.012486	28.0635	5.90584	5.22162e-06	1.72959e-06	3.89358e-07	4.44215	4.45331e-06	5.35132	yes
Excitatory Layers II-III	Excitatory neurons	Promoter only	0.3525	0.0164	896549	0.00308497	0.0761664	0.0147026	24.6895	4.76589	6.64781e-07	1.46836e-06	3.32287e-07	4.41896	4.95888e-06	5.30462	yes
Excitatory Layers II-V*	Excitatory neurons	Promoter only	0.3524	0.0164	896549	0.00243459	0.0597296	0.0125876	24.5337	5.17031	4.73829e-06	1.47193e-06	3.50237e-07	4.20267	1.31895e-05	4.87977	yes
Excitatory Layer IV	Excitatory neurons	Promoter only	0.3527	0.0164	896549	0.00311248	0.0643125	0.0147382	20.6628	4.73518	2.03885e-05	1.15975e-06	3.21268e-07	3.60993	0.000153143	3.8149	no
Excitatory Layer V	Excitatory neurons	Promoter only	0.3527	0.0164	896549	0.00315207	0.0619198	0.0144218	19.6442	4.57534	3.59541e-05	1.07975e-06	3.04544e-07	3.54547	0.000195955	3.70784	no
Inhibitory VIP	Inhibitory neurons	Promoter only	0.3524	0.0164	896549	0.00242788	0.0492331	0.0119967	20.2782	4.94121	0.00010443	1.15579e-06	3.34168e-07	3.45872	0.000271374	3.56643	no
Embryonic DA midbrain	Dopaminergic neurons	Promoter only	0.3527	0.0165	896549	0.00318193	0.0610041	0.0145732	19.172	4.57997	5.24039e-05	1.02909e-06	3.21803e-07	3.1979	0.000692157	3.1598	no
Embryonic DA forebrain	Dopaminergic neurons	Promoter only	0.3527	0.0165	896549	0.00321783	0.0590235	0.0145326	18.3426	4.51628	9.33783e-05	9.55326e-07	3.18225e-07	3.00204	0.00134088	2.87261	no
Inhibitory*	Inhibitory neurons	Promoter only	0.3531	0.0164	896549	0.00162888	0.0329138	0.0103878	20.2064	6.37725	0.00270468	1.16572e-06	4.07478e-07	2.86082	0.00211271	2.67516	no
Inhibitory PV	Inhibitory neurons	Promoter only	0.3527	0.0164	896549	0.0023742	0.0395795	0.0120535	16.6706	5.07686	0.00197629	8.62337e-07	3.38214e-07	2.54968	0.00539112	2.26832	no
Cones (blue)	Retina cells	Promoter only	0.353	0.0164	896549	0.00213566	0.0343349	0.0116872	16.0769	5.47242	0.00541665	9.11567e-07	3.58011e-07	2.5462	0.00544515	2.26399	no
NeuN negative	Glia	Promoter only	0.3529	0.0164	896549	0.00203836	0.0369332	0.0121511	18.1191	5.96121	0.00415063	1.03619e-06	4.14615e-07	2.49916	0.00622445	2.2059	no
Microglia*	Glia	Promoter only	0.3533	0.0164	896549	0.00186709	0.0290386	0.00987339	15.5529	5.28813	0.00535617	8.64144e-07	3.56231e-07	2.4258	0.00763735	2.11706	no
Cones (green)	Retina cells	Promoter only	0.3531	0.0164	896549	0.00207913	0.0321279	0.0119924	15.4526	5.76802	0.0115926	8.68609e-07	3.8504e-07	2.25589	0.0120387	1.91942	no
Oligodendrocytes*	Glia	Promoter only	0.3531	0.0164	896549	0.00189007	0.0304196	0.0108832	16.0944	5.75812	0.00879674	9.00964e-07	4.00304e-07	2.2507	0.0122023	1.91356	no
Excitatory Camk2a	Excitatory neurons	Promoter only	0.3529	0.0164	896549	0.00195734	0.0294077	0.0111176	15.0243	5.67997	0.0133353	7.71433e-07	3.68968e-07	2.09078	0.0182737	1.73817	no
Astrocytes*	Glia	Promoter only	0.3535	0.0164	896549	0.00191792	0.0277869	0.0114932	14.4881	5.99256	0.0226851	7.6969e-07	3.76917e-07	2.04207	0.0205723	1.68672	no
CD4 T-cells	T-cells	Promoter only	0.3532	0.0165	896549	0.00218431	0.0289701	0.0122867	13.2628	5.62498	0.0278981	6.68141e-07	3.63961e-07	1.83575	0.0331975	1.47889	no
Rods	Retina cells	Promoter only	0.3533	0.0164	896549	0.00188017	0.0204655	0.0102034	10.8849	5.42685	0.0673402	5.55101e-07	3.49477e-07	1.58837	0.0561008	1.25103	no
CD8 T-cells	T-cells	Promoter only	0.3534	0.0165	896549	0.00222507	0.0240885	0.0117649	10.826	5.28741	0.0601539	4.73509e-07	3.50064e-07	1.35264	0.088086	1.05509	no
Microglia	Glia	Promoter only	0.3536	0.0164	896549	0.00224302	0.0161972	0.011438	7.22113	5.09939	0.220778	2.75185e-07	3.40588e-07	0.807969	0.209554	0.678703	no
CD4 T-cells human	T-cells	Promoter only	0.3538	0.0164	896549	0.00300898	0.0171297	0.0148323	5.69287	4.92935	0.341334	1.1255e-07	3.6483e-07	0.3085	0.378851	0.421531	no
CD8 T-cells human	T-cells	Promoter only	0.3541	0.0164	896549	0.00304085	0.00905453	0.0126341	2.97763	4.15481	0.634163	-1.24008e-07	3.00291e-07	-0.412958	0.660181	0.180337	no

## Sheet: Distal only
cell.population	type	set	h2	h2_se	n_snps	Prop._SNPs	Prop._h2	Prop._h2_std_error	Enrichment	Enrichment_std_error	Enrichment_p	Coefficient	Coefficient_std_error	Coefficient_z-score	p	p.log10	signif.all
Excitatory Layers II-V*	Excitatory neurons	Distal only	0.3581	0.0164	896549	0.00888066	0.205161	0.0215377	23.102	2.42524	6.81445e-16	1.2405e-06	1.51873e-07	8.16804	1.56721e-16	15.8049	yes
Excitatory Layer V	Excitatory neurons	Distal only	0.3587	0.0163	896549	0.00959981	0.198992	0.0206004	20.7287	2.14592	3.67439e-16	1.10793e-06	1.38875e-07	7.97787	7.44404e-16	15.1282	yes
Excitatory Layer IV	Excitatory neurons	Distal only	0.3598	0.0165	896549	0.00955938	0.206276	0.0228826	21.5784	2.39373	6.55477e-14	1.16083e-06	1.57774e-07	7.35754	9.3664e-14	13.0284	yes
Excitatory Layers II-III	Excitatory neurons	Distal only	0.3585	0.0164	896549	0.00866727	0.195034	0.0220797	22.5023	2.54748	6.62422e-14	1.20591e-06	1.66592e-07	7.23866	2.26563e-13	12.6448	yes
Excitatory Layer VI*	Excitatory neurons	Distal only	0.3574	0.0164	896549	0.00506177	0.123341	0.0154968	24.3672	3.06154	4.21971e-13	1.2998e-06	1.82815e-07	7.1099	5.80632e-13	12.2361	yes
Excitatory Layer VI	Excitatory neurons	Distal only	0.3594	0.0164	896549	0.0097523	0.185488	0.0217064	19.02	2.22577	2.67352e-13	1.00055e-06	1.44264e-07	6.93552	2.02361e-12	11.6939	yes
Inhibitory Gad2	Inhibitory neurons	Distal only	0.3585	0.0165	896549	0.008548	0.186604	0.0227653	21.8301	2.66323	3.175e-12	1.1531e-06	1.75891e-07	6.55573	2.76858e-11	10.5577	yes
Excitatory DG*	Excitatory neurons	Distal only	0.3578	0.0162	896549	0.00943441	0.206629	0.0271744	21.9016	2.88035	1.95333e-11	1.16197e-06	1.77696e-07	6.53908	3.09489e-11	10.5094	yes
Inhibitory*	Inhibitory neurons	Distal only	0.3567	0.0163	896549	0.00460598	0.102585	0.0154687	22.2721	3.35838	6.63829e-10	1.16109e-06	1.97407e-07	5.88171	2.0303e-09	8.69244	yes
Inhibitory MSN*	Inhibitory neurons	Distal only	0.3565	0.0165	896549	0.00549876	0.108051	0.0156171	19.65	2.84011	1.21187e-09	9.88311e-07	1.78375e-07	5.54063	1.5069e-08	7.82191	yes
Excitatory Camk2a	Excitatory neurons	Distal only	0.3544	0.0163	896549	0.0078624	0.10791	0.0173809	13.7249	2.21064	1.56892e-08	6.64868e-07	1.30444e-07	5.09696	1.72573e-07	6.76303	yes
Astrocytes*	Glia	Distal only	0.3559	0.0164	896549	0.00525351	0.0768291	0.0157483	14.6243	2.99766	8.37903e-06	6.82116e-07	1.7941e-07	3.802	7.17659e-05	4.14408	no
Inhibitory PV	Inhibitory neurons	Distal only	0.3547	0.0163	896549	0.00546672	0.074895	0.0151866	13.7002	2.778	6.47877e-06	6.1729e-07	1.67974e-07	3.6749	0.00011897	3.92456	no
Microglia*	Glia	Distal only	0.3543	0.0164	896549	0.00440434	0.0581109	0.0138145	13.194	3.13656	0.000126213	6.22957e-07	1.91584e-07	3.25161	0.000573771	3.24126	no
Cones (green)	Retina cells	Distal only	0.3546	0.0164	896549	0.00368502	0.0469175	0.0103738	12.7319	2.81512	6.50548e-05	5.56361e-07	1.80341e-07	3.08506	0.00101757	2.99244	no
Embryonic DA forebrain	Dopaminergic neurons	Distal only	0.3545	0.0164	896549	0.00484084	0.0677618	0.0141208	13.9979	2.91701	1.31423e-05	5.46877e-07	1.79608e-07	3.04483	0.00116405	2.93403	no
Inhibitory VIP	Inhibitory neurons	Distal only	0.3549	0.0164	896549	0.00620618	0.0683645	0.0151578	11.0156	2.44238	6.48252e-05	4.44625e-07	1.49655e-07	2.97101	0.00148413	2.82853	no
Oligodendrocytes*	Glia	Distal only	0.3547	0.0165	896549	0.00386653	0.0500348	0.0131383	12.9405	3.39795	0.000591629	5.68725e-07	2.04266e-07	2.78423	0.00268271	2.57143	no
Embryonic DA midbrain	Dopaminergic neurons	Distal only	0.3547	0.0165	896549	0.00477072	0.0631968	0.0161181	13.2468	3.37854	0.000383871	5.04954e-07	2.07693e-07	2.43125	0.00752346	2.12358	no
Cones (blue)	Retina cells	Distal only	0.3543	0.0164	896549	0.00340555	0.0342727	0.0107422	10.0638	3.15433	0.00440643	3.90734e-07	1.95746e-07	1.99613	0.02296	1.63903	no
Rods	Retina cells	Distal only	0.3541	0.0164	896549	0.00235827	0.0225384	0.00913712	9.55717	3.87451	0.0287427	3.4581e-07	2.41861e-07	1.42979	0.0763892	1.11697	no
CD8 T-cells	T-cells	Distal only	0.3539	0.0164	896549	0.00452798	0.0420227	0.0202461	9.28068	4.47134	0.0621278	3.75644e-07	2.67475e-07	1.40441	0.0800987	1.09637	no
CD4 T-cells	T-cells	Distal only	0.3539	0.0164	896549	0.00471469	0.0340687	0.0209039	7.22607	4.43378	0.156545	2.558e-07	2.64217e-07	0.968141	0.166487	0.77862	no
NeuN negative	Glia	Distal only	0.354	0.0164	896549	0.00513323	0.0277025	0.0141006	5.39671	2.74692	0.110031	1.40879e-07	1.68623e-07	0.83547	0.201727	0.695237	no
Microglia	Glia	Distal only	0.3539	0.0164	896549	0.0051641	0.0113349	0.0132318	2.19495	2.56227	0.640303	-3.7947e-08	1.5456e-07	-0.245517	0.596972	0.224046	no
CD4 T-cells human	T-cells	Distal only	0.3541	0.0164	896549	0.00493813	0.00609613	0.0148895	1.2345	3.0152	0.938071	-1.04778e-07	1.89855e-07	-0.551885	0.709486	0.149056	no
CD8 T-cells human	T-cells	Distal only	0.3542	0.0164	896549	0.00504952	-0.00332338	0.0149064	-0.658156	2.95204	0.573475	-2.19499e-07	1.80391e-07	-1.2168	0.88816	0.051509	no

## Sheet: Top annotation removed
cell.population	type	set	h2	h2_se	n_snps	Prop._SNPs	Prop._h2	Prop._h2_std_error	Enrichment	Enrichment_std_error	Enrichment_p	Coefficient	Coefficient_std_error	Coefficient_z-score	p	p.log10	signif.all
Excitatory Layers II-III	Excitatory neurons	Top annotation removed	0.356	0.0165	896549	0.00423072	0.0910195	0.0160453	21.514	3.79257	5.64729e-07	1.11368e-06	2.43941e-07	4.56538	2.49292e-06	5.60329	yes
Excitatory DG*	Excitatory neurons	Top annotation removed	0.3557	0.0163	896549	0.00597216	0.10564	0.0204545	17.6887	3.42497	2.40132e-06	8.99842e-07	2.05905e-07	4.37018	6.2073e-06	5.2071	yes
Excitatory Layer IV	Excitatory neurons	Top annotation removed	0.3566	0.0166	896549	0.00494736	0.0939096	0.0175019	18.9818	3.53762	2.32058e-06	9.73387e-07	2.23184e-07	4.36137	6.46267e-06	5.18959	yes
Inhibitory Gad2	Inhibitory neurons	Top annotation removed	0.3568	0.0165	896549	0.00583595	0.117659	0.0218227	20.1612	3.73936	1.9356e-06	1.03042e-06	2.39612e-07	4.30039	8.52487e-06	5.06931	yes
Excitatory Layer VI	Excitatory neurons	Top annotation removed	0.3564	0.0165	896549	0.00573043	0.0937189	0.0176269	16.3546	3.07601	2.13694e-06	8.1652e-07	1.93014e-07	4.23036	1.16658e-05	4.93309	yes
Excitatory Layer V	Excitatory neurons	Top annotation removed	0.3556	0.0164	896549	0.0049482	0.076944	0.0154177	15.5499	3.11582	7.82588e-06	7.57246e-07	1.94545e-07	3.8924	4.9629e-05	4.30426	no
Excitatory Layer VI*	Excitatory neurons	Top annotation removed	0.3552	0.0164	896549	0.00285146	0.0456575	0.0105078	16.012	3.68507	5.00004e-05	8.08627e-07	2.17363e-07	3.72017	9.9545e-05	4.00198	no
Inhibitory*	Inhibitory neurons	Top annotation removed	0.3555	0.0164	896549	0.00327403	0.0536538	0.0121136	16.3877	3.69991	5.24802e-05	8.27715e-07	2.23504e-07	3.70336	0.000106382	3.97313	no
Inhibitory MSN*	Inhibitory neurons	Top annotation removed	0.3554	0.0165	896549	0.00399989	0.0601192	0.0142378	15.0302	3.55954	0.000153969	7.19565e-07	2.18827e-07	3.28828	0.000504008	3.29756	no
Cones (green)	Retina cells	Top annotation removed	0.3543	0.0164	896549	0.00290447	0.0293282	0.0101569	10.0976	3.497	0.0113219	4.14621e-07	2.17926e-07	1.90258	0.0285475	1.54443	no
Microglia*	Glia	Top annotation removed	0.3541	0.0164	896549	0.00375984	0.0324628	0.0120376	8.63409	3.20162	0.0175686	3.61622e-07	1.93497e-07	1.86888	0.0308197	1.51117	no
Astrocytes*	Glia	Top annotation removed	0.3549	0.0164	896549	0.00434882	0.0394368	0.0138681	9.06839	3.18894	0.0120136	3.5727e-07	1.91363e-07	1.86698	0.0309524	1.50931	no
Oligodendrocytes*	Glia	Top annotation removed	0.3543	0.0165	896549	0.00310342	0.0270181	0.0112847	8.70592	3.63621	0.0358759	3.2838e-07	2.19566e-07	1.49559	0.0673808	1.17146	no
Embryonic DA forebrain	Dopaminergic neurons	Top annotation removed	0.354	0.0164	896549	0.00356609	0.0357004	0.0126835	10.0111	3.5567	0.0119101	2.99366e-07	2.1608e-07	1.38544	0.0829585	1.08114	no
Inhibitory PV	Inhibitory neurons	Top annotation removed	0.3541	0.0164	896549	0.0035431	0.0267329	0.0120781	7.54506	3.4089	0.0544996	2.53675e-07	2.04802e-07	1.23864	0.10774	0.967622	no
CD8 T-cells	T-cells	Top annotation removed	0.3539	0.0164	896549	0.00387475	0.0260308	0.0170776	6.71806	4.40741	0.191943	2.33691e-07	2.6241e-07	0.890557	0.186583	0.729127	no
Cones (blue)	Retina cells	Top annotation removed	0.3541	0.0164	896549	0.002703	0.0174569	0.0095601	6.45836	3.53685	0.123707	1.89535e-07	2.16087e-07	0.877126	0.190209	0.720769	no
Inhibitory VIP	Inhibitory neurons	Top annotation removed	0.3541	0.0164	896549	0.00449577	0.0249568	0.0132905	5.55118	2.95623	0.1269	1.27247e-07	1.78236e-07	0.713926	0.237637	0.624087	no
CD4 T-cells	T-cells	Top annotation removed	0.3539	0.0164	896549	0.00404317	0.0206586	0.0194331	5.10951	4.80639	0.390358	1.44534e-07	2.86792e-07	0.503969	0.307142	0.512661	no
Rods	Retina cells	Top annotation removed	0.354	0.0164	896549	0.00184696	0.00791575	0.00740121	4.28584	4.00725	0.414484	5.34644e-08	2.46112e-07	0.217236	0.414012	0.382987	no
Embryonic DA midbrain	Dopaminergic neurons	Top annotation removed	0.354	0.0164	896549	0.00349714	0.0180905	0.0144839	5.17296	4.14164	0.315455	1.11178e-08	2.5175e-07	0.0441621	0.482388	0.316604	no
Excitatory Camk2a	Excitatory neurons	Top annotation removed	0.3539	0.0164	896549	0.00358471	0.00896456	0.0114142	2.50078	3.18413	0.63708	1.72208e-09	1.89553e-07	0.009085	0.496376	0.30419	no
Excitatory Layers II-V*	Excitatory neurons	Top annotation removed	0	0	896549	0	0	0	0	0	0	0	0	0	0	0	no
NeuN negative	Glia	Top annotation removed	0.3539	0.0164	896549	0.00408041	0.00907116	0.0122243	2.2231	2.99584	0.68281	-2.76383e-08	1.80595e-07	-0.15304	0.560817	0.251179	no
Microglia	Glia	Top annotation removed	0.3539	0.0164	896549	0.00450231	-0.00549359	0.0119138	-1.22017	2.64616	0.403282	-2.29994e-07	1.59979e-07	-1.43765	0.924734	0.0339832	no
CD4 T-cells human	T-cells	Top annotation removed	0.3543	0.0164	896549	0.00502151	-0.0187196	0.0137326	-3.72788	2.73476	0.0811974	-4.22184e-07	1.69883e-07	-2.48515	0.993525	0.00282114	no
CD8 T-cells human	T-cells	Top annotation removed	0.3544	0.0164	896549	0.00517584	-0.0315293	0.0137724	-6.09163	2.6609	0.00737153	-5.71905e-07	1.59922e-07	-3.57614	0.999826	7.57276e-05	no

## Sheet: Unique only
cell.population	type	set	h2	h2_se	n_snps	Prop._SNPs	Prop._h2	Prop._h2_std_error	Enrichment	Enrichment_std_error	Enrichment_p	Coefficient	Coefficient_std_error	Coefficient_z-score	p	p.log10	signif.all
Excitatory DG*	Excitatory neurons	Unique only	0.3549	0.0164	896549	0.0022811	0.0499274	0.0122499	21.8874	5.37019	0.000147257	1.19447e-06	3.23171e-07	3.6961	0.000109469	3.96071	no
Inhibitory Gad2	Inhibitory neurons	Unique only	0.3553	0.0166	896549	0.000717142	0.0351965	0.0107318	49.0789	14.9647	0.00205171	2.80884e-06	9.16722e-07	3.064	0.00109199	2.96178	no
Inhibitory*	Inhibitory neurons	Unique only	0.3549	0.0164	896549	0.00154483	0.0293941	0.00951315	19.0274	6.15804	0.00372292	1.02682e-06	3.67091e-07	2.79719	0.00257744	2.58881	no
Excitatory Layer VI	Excitatory neurons	Unique only	0.355	0.0165	896549	0.00111371	0.0236981	0.00764735	21.2786	6.86656	0.00411527	1.16112e-06	4.15625e-07	2.79367	0.00260568	2.58408	no
Excitatory Layers II-V*	Excitatory neurons	Unique only	0.3546	0.0165	896549	0.00144536	0.0219786	0.00708563	15.2063	4.90234	0.00487846	8.00176e-07	2.97581e-07	2.68893	0.00358404	2.44563	no
Excitatory Layer VI*	Excitatory neurons	Unique only	0.3546	0.0164	896549	0.00110079	0.0176943	0.00624707	16.0741	5.67506	0.00876411	8.55644e-07	3.39498e-07	2.52032	0.00586236	2.23193	no
Excitatory Layers II-III	Excitatory neurons	Unique only	0.3542	0.0164	896549	0.000370733	0.0119365	0.00460169	32.1971	12.4124	0.015433	1.8113e-06	7.57461e-07	2.39128	0.00839482	2.07599	no
Excitatory Layer IV	Excitatory neurons	Unique only	0.3546	0.0165	896549	0.000613807	0.0135522	0.00610981	22.0789	9.95395	0.0367908	1.21747e-06	5.96591e-07	2.0407	0.0206402	1.68529	no
Embryonic DA forebrain	Dopaminergic neurons	Unique only	0.3539	0.0164	896549	0.000500574	0.00951183	0.00418917	19.0019	8.36873	0.0327645	8.82021e-07	4.96346e-07	1.77703	0.0377817	1.42272	no
Cones (green)	Retina cells	Unique only	0.354	0.0164	896549	0.000292393	0.0083839	0.00494394	28.6734	16.9086	0.106786	1.59217e-06	1.01281e-06	1.57203	0.0579713	1.23679	no
Inhibitory MSN*	Inhibitory neurons	Unique only	0.3544	0.0165	896549	0.00160522	0.0172781	0.00951404	10.7637	5.92692	0.103744	5.29647e-07	3.5455e-07	1.49386	0.0676065	1.17001	no
Microglia*	Glia	Unique only	0.354	0.0164	896549	0.00135745	0.0123069	0.00831798	9.06616	6.12763	0.187971	4.30372e-07	3.63223e-07	1.18487	0.118035	0.92799	no
Oligodendrocytes*	Glia	Unique only	0.3541	0.0164	896549	0.0011902	0.0102143	0.00656756	8.58201	5.51801	0.169478	3.87272e-07	3.28463e-07	1.17904	0.119191	0.923758	no
Excitatory Layer V	Excitatory neurons	Unique only	0.354	0.0164	896549	0.000275114	0.00372525	0.00317089	13.5407	11.5257	0.27431	7.08332e-07	6.80047e-07	1.04159	0.1488	0.827397	no
Astrocytes*	Glia	Unique only	0.3543	0.0164	896549	0.0018634	0.0124628	0.00856007	6.6882	4.5938	0.216009	2.78825e-07	2.73809e-07	1.01832	0.154263	0.811739	no
CD4 T-cells human	T-cells	Unique only	0.3538	0.0164	896549	0.000598374	0.00597935	0.00580283	9.99266	9.69768	0.357258	4.85896e-07	5.79174e-07	0.838946	0.20075	0.697345	no
Inhibitory PV	Inhibitory neurons	Unique only	0.354	0.0164	896549	0.000703554	0.00563655	0.00508807	8.01153	7.23195	0.331193	3.42777e-07	4.28586e-07	0.799786	0.211917	0.673833	no
Cones (blue)	Retina cells	Unique only	0.3539	0.0164	896549	0.000164733	0.00146647	0.00231729	8.90208	14.0669	0.573771	3.84456e-07	8.3371e-07	0.461139	0.32235	0.491673	no
CD8 T-cells	T-cells	Unique only	0.3539	0.0164	896549	0.000322421	0.00223022	0.00425928	6.9171	13.2103	0.653984	3.03583e-07	7.82922e-07	0.387756	0.349098	0.457052	no
CD4 T-cells	T-cells	Unique only	0.3539	0.0164	896549	0.000475914	0.000916826	0.00459994	1.92645	9.66549	0.923646	2.31981e-08	5.74849e-07	0.0403551	0.483905	0.31524	no
NeuN negative	Glia	Unique only	0.3539	0.0164	896549	0.00169212	0.00107964	0.00720195	0.638037	4.25617	0.932243	-4.21754e-08	2.53195e-07	-0.166572	0.566147	0.247071	no
Inhibitory VIP	Inhibitory neurons	Unique only	0.3539	0.0164	896549	0.00103688	0.00172696	0.00546107	1.66554	5.26683	0.899446	-6.45491e-08	3.12621e-07	-0.206477	0.581791	0.235233	no
Excitatory Camk2a	Excitatory neurons	Unique only	0.354	0.0164	896549	0.000673191	-0.0011519	0.00517921	-1.71111	7.69352	0.725151	-2.07607e-07	4.57823e-07	-0.453466	0.674893	0.170765	no
Rods	Retina cells	Unique only	0.354	0.0164	896549	0.000136886	-0.00126776	0.00156475	-9.26139	11.431	0.368474	-6.73093e-07	6.76492e-07	-0.994975	0.840126	0.0756557	no
CD8 T-cells human	T-cells	Unique only	0.3542	0.0164	896549	0.00074046	-0.00693584	0.0049388	-9.36693	6.66991	0.117971	-6.42625e-07	3.93066e-07	-1.63491	0.948966	0.0227496	no
Microglia	Glia	Unique only	0.3539	0.0164	896549	0.00100635	-0.00883605	0.00606406	-8.78032	6.02581	0.104717	-6.12943e-07	3.56936e-07	-1.71723	0.957032	0.0190736	no
Embryonic DA midbrain	Dopaminergic neurons	Unique only	0.3536	0.0164	896549	0.000500909	-0.00835929	0.00366641	-16.6882	7.3195	0.0153919	-1.20904e-06	4.33523e-07	-2.78886	0.997355	0.0011501	no
