# Supplementary material for: Leveraging mouse chromatin data for heritability enrichment informs common disease architecture and reveals cortical layer contributions to schizophrenia
Source: HighWire-hosted journal article supplement (doi:10.1101/gr.256578.119), 2020-04-01
Supplement: Supplemental_Table_S8.xlsx [file Supplemental_Table_S8.xlsx]

## Sheet: README
Supplemental Table S8. Summary of 177 fine-mapped schizophrenia loci. This contains the lead SNP identified in Pardinas, et al. (Pardiñas et al. 2018) (“lead.snp”), the total number of SNPs fine-mapped for each locus (“n.snps”), the number of SNPs that reach a PIP > 0.1 (“PIP >= 0.1”), the number of SNPs that reach a PIP > 0.5 (“PIP >= 0.5”), the number of SNPs that reach a PIP > 0.9 (“PIP >= 0.9…

## Sheet: Supplemental Table S8
lead.snp	n.snps	PIP >= 0.1	PIP >= 0.5	PIP >= 0.9	PIP >= 0.1,overlap	PIP >= 0.5,overlap	PIP >= 0.9,overlap	PIP >= 0.1,overlap,motif	PIP >= 0.1,overlap,HiC	PIP >= 0.1,overlap,VISTA	PIP >= 0.1,overlap,HiC,motif	Genes tagged - Pardinas 2018
rs10083370	579	1	0	0	1	0	0	1	1	0	1	APOPT1, BAG5, C14orf2, CKB, KLC1, LINC00637, MARK3, PPP1R13B, RD3L, TDRD9, TRMT61A, XRCC3, ZFYVE21
rs10148671	265	4	0	0	0	0	0	0	0	0	0	none
rs10156310	236	0	0	0	0	0	0	0	0	0	0	BAG4, DDHD2, FGFR1, LETM2, LSM1, PPAPDC1B, WHSC1L1
rs10196799	452	5	0	0	1	0	0	0	0	0	0	ZNF804A
rs1042992	72	6	0	0	0	0	0	0	0	0	0	BNIP3L, PPP2R2A
rs10520163	447	2	0	0	1	0	0	0	0	0	0	CLCN3, NEK1
rs10650434	859	6	0	0	1	0	0	0	0	0	0	FTSJ2, MAD1L1, MIR4655, MIR6836, NUDT1, SNX8
rs10783624	548	1	0	0	0	0	0	0	0	0	0	ABCD2, KIF21A
rs10803138	363	9	1	0	5	1	0	4	1	0	1	CEP170, LOC731275, MIR4677, SDCCAG8
rs1080500	953	5	0	0	5	0	0	3	2	0	1	ALAS1, BAP1, DNAH1, GLT8D1, GLYCTK, GNL3, ITIH1, ITIH3, ITIH4, MIR135A1, MIR8064, MIRLET7G, MUSTN1, NEK4, NISCH, NT5DC2, PBRM1, PHF7, PPM1M, PRKCD, RFT1, SEMA3G, SFMBT1, SMIM4, SNORD19, SNORD19B, SNORD69, SPCS1, STAB1, TKT, TLR9, TMEM110, TMEM110-MUSTN1, TNNC1, TWF2, WDR82
rs10985817	164	2	0	0	2	0	0	2	0	0	0	GABBR2, MIR6854, TBC1D2
rs111294930	1303	5	0	0	0	0	0	0	0	0	0	LOC101927134
rs11165867	263	2	0	0	0	0	0	0	0	0	0	DPYD, DPYD-AS1
rs1120004	382	11	0	0	0	0	0	0	0	0	0	LOC101928441
rs11409090	690	2	0	0	2	0	0	1	0	0	0	TBC1D5
rs11646127	329	2	0	0	2	0	0	2	2	0	2	ALDOA, C16orf92, DOC2A, FAM57B, GDPD3, HIRIP3, INO80E, KCTD13, MAPK3, PPP4C, TAOK2, TBX6, TMEM219, YPEL3
rs11685299	337	2	0	0	0	0	0	0	0	0	0	CUL3
rs11783093	162	8	0	0	0	0	0	0	0	0	0	CHRNA2, CLU, EPHX2, MIR6843
rs1191551	211	4	0	0	0	0	0	0	0	0	0	MIR548AI, PRKD1
rs11993663	1467	14	0	0	11	0	0	4	0	0	0	CLDN23, ERI1, FAM86B3P, LINC00599, LOC157273, MFHAS1, MIR124-1, MIR597, MIR4660, MSRA, PPP1R3B, SGK223, TNKS
rs12009217	123	0	0	0	0	0	0	0	0	0	0	NLGN4X
rs12129573	1348	0	0	0	0	0	0	0	0	0	0	LOC101927295
rs12129719	420	0	0	0	0	0	0	0	0	0	0	PDE4B
rs12148337	231	5	0	0	0	0	0	0	0	0	0	none
rs12293670	116	12	0	0	10	0	0	3	9	0	3	ESAM, MSANTD2, NRGN, VSIG2
rs12416331	497	5	0	0	1	0	0	0	1	0	0	ACTR1A, ARL3, AS3MT, C10orf32, C10orf32-ASMT, CALHM1, CALHM2, CALHM3, CNNM2, CYP17A1, INA, MIR1307, NEURL1, NT5C2, PCGF6, PDCD11, RPEL1, SFXN2, SUFU, TAF5, TMEM180, TRIM8, USMG5, WBP1L
rs12447542	39	8	1	0	1	0	0	0	0	0	0	RBFOX1
rs12498839	57	7	1	1	1	0	0	1	0	0	0	GPM6A
rs12522290	259	13	1	1	0	0	0	1	0	0	0	GRIA1
rs12704290	417	9	0	0	1	0	0	1	0	0	0	GRM3, KIAA1324L
rs12705761	442	0	0	0	0	0	0	0	0	0	0	IMMP2L, LRRN3
rs12712510	431	1	0	0	0	0	0	0	0	0	0	LOC102723362
rs12823424	80	12	0	0	2	0	0	2	0	0	0	CACNA1C
rs12898315	222	2	0	0	0	0	0	0	0	0	0	none
rs12908161	648	0	0	0	0	0	0	0	0	0	0	ADAMTSL3, ALPK3, DNM1P41, EFTUD1P1, GOLGA2P7, GOLGA6L4, GOLGA6L5P, LINC00933, LOC440300, LOC642423, LOC102724034, LOC103171574, NMB, SCAND2P, SEC11A, UBE2Q2L, UBE2Q2P1, WDR73, ZNF592, ZSCAN2
rs12991836	55	8	1	0	2	0	0	1	0	0	0	ZEB2
rs13107325	142	4	1	0	0	0	0	0	0	0	0	BANK1, SLC39A8
rs13121251	945	3	0	0	1	0	0	1	1	0	1	INPP4B
rs13169274	208	10	1	0	9	1	0	3	6	0	2	BRD8, CDC23, CDC25C, EGR1, ETF1, FAM53C, GFRA3, HSPA9, KDM3B, KIF20A, NME5, REEP2, SNORD63
rs1319017	302	3	0	0	0	0	0	0	0	0	0	SPATA31D1, SPATA31D3, SPATA31D4, SPATA31D5P
rs1339227	298	9	0	0	4	0	0	2	0	0	0	RIMS1
rs1347692	179	14	1	0	7	0	0	4	6	0	3	SPATS2L
rs1353545	103	7	0	0	1	0	0	0	0	0	0	FHIT
rs139425113	226	4	0	0	2	0	0	1	0	0	0	CSMD1
rs140505938	729	3	0	0	2	0	0	1	2	0	1	ADAMTSL4, ADAMTSL4-AS1, ANP32E, ANXA9, APH1A, ARNT, BNIPL, C1orf54, C1orf56, CA14, CDC42SE1, CERS2, CIART, CTSK, CTSS, ECM1, ENSA, FAM63A, GABPB2, GOLPH3L, HORMAD1, LINC00568, MCL1, MIR4257, MIR6878, MLLT11, MRPS21, PLEKHO1, PRPF3, PRUNE, RPRD2, SEMA6C, SETDB1, TARS2, VPS45
rs14403	359	9	0	0	3	0	0	4	0	0	0	AKT3, SDCCAG8
rs144158419	270	12	1	1	8	0	0	5	0	0	0	LOC101927273, MIR4529, TCF4
rs1451488	558	3	0	0	0	0	0	2	0	0	0	SATB2
rs146678232	675	1	0	0	0	0	0	0	0	0	0	DFNA5, MPP6, OSBPL3
rs1473594	885	40	0	0	3	0	0	2	0	0	0	CA8
rs147922658	252	6	0	0	0	0	0	0	0	0	0	ABCB1, ABCB4, CROT, DMTF1, GRM3, KIAA1324L, RUNDC3B, TMEM243, TP53TG1
rs150437760	457	4	0	0	1	0	0	1	0	0	0	CCDC175, DAAM1, GPR135, JKAMP, L3HYPDH, RTN1
rs16867576	62	8	0	0	0	0	0	0	0	0	0	LINC00461, LOC102546226, MEF2C, MEF2C-AS1, MIR9-2, TMEM161B, TMEM161B-AS1
rs16902086	1919	1	0	0	0	0	0	0	0	0	0	HCN1, LOC100506674, MRPS30
rs17465671	299	0	0	0	0	0	0	0	0	0	0	none
rs17514846	75	2	2	0	2	2	0	2	2	0	2	FES, FURIN
rs1765142	559	0	0	0	0	0	0	0	0	0	0	ARL14EP, FSHB, MPPED2
rs1789595	46	7	0	0	1	0	0	1	0	0	0	LOC100505474
rs1899543	389	0	0	0	0	0	0	0	0	0	0	LUZP2
rs1975802	1014	173	0	0	17	0	0	8	15	0	6	CENPT, CTRL, DDX28, DPEP2, DPEP3, DUS2, EDC4, ESRP2, LCAT, LOC100131303, MIR6773, NFATC3, NRN1L, NUTF2, PLA2G15, PRMT7, PSKH1, PSMB10, SLC7A6, SLC7A6OS, SLC12A4, SMPD3, THAP11, TSNAXIP1
rs198160	61	2	2	0	0	0	0	0	0	0	0	none
rs199687649	190	8	0	0	0	0	0	0	0	0	0	MIR548AI, PRKD1
rs200626410	291	6	3	2	0	0	0	2	0	0	0	none
rs2007044	144	8	0	0	6	0	0	3	0	0	0	CACNA1C, CACNA1C-AS4, CACNA1C-IT3
rs2053079	159	5	2	1	0	0	0	0	0	0	0	ZNF536
rs2077586	26	6	0	0	3	0	0	3	3	0	3	EMX1
rs211829	347	3	0	0	0	0	0	0	0	0	0	none
rs215411	318	2	0	0	0	0	0	0	0	0	0	MIR548AJ2
rs2161711	266	9	0	0	2	0	0	2	0	0	0	CALB2, CHST4, CMTR2, HYDIN, ZNF19, ZNF23
rs217287	591	3	0	0	1	0	0	0	0	0	0	ME1, PRSS35, SNAP91
rs2332700	203	4	1	1	0	0	0	0	0	0	0	RGS6
rs2410572	269	11	0	0	5	0	0	4	0	0	0	PSD3
rs2514218	174	5	1	0	2	0	0	1	1	0	0	DRD2, MIR4301
rs254782	285	13	2	0	1	0	0	1	0	0	0	LINC00461, LOC102546226, MEF2C, MEF2C-AS1, MIR9-2, TMEM161B, TMEM161B-AS1
rs2565065	224	3	0	0	2	0	0	1	2	0	1	CHRNA2, MIR6842, PTK2B
rs2660304	602	9	1	1	1	0	0	0	1	0	0	DPYD, DPYD-AS2, MIR137, MIR137HG, MIR2682
rs281299	366	3	0	0	2	0	0	0	0	0	0	SEMA6D
rs28374258	563	2	0	0	0	0	0	0	0	0	0	LOC440704
rs2851447	692	5	2	2	1	0	0	1	1	0	1	ABCB9, ARL6IP4, C12orf65, CCDC62, CDK2AP1, HIP1R, LOC100507091, MIR4304, MIR8072, MPHOSPH9, OGFOD2, PITPNM2, RILPL2, SBNO1, SETD8, VPS37B
rs28758902	294	9	0	0	4	0	0	2	0	0	0	TCF4
rs2905432	565	2	1	0	1	0	0	1	1	0	1	ATP13A1, CILP2, GATAD2A, GMIP, HAPLN4, LPAR2, MAU2, NCAN, NDUFA13, PBX4, SUGP1, TM6SF2, TSSK6, YJEFN3, ZNF101
rs2910032	396	2	1	0	1	0	0	1	0	0	0	none
rs2917569	104	2	0	0	0	0	0	0	0	0	0	OPCML
rs2949006	512	11	2	1	4	0	0	2	4	0	2	C2orf47, C2orf69, FTCDNL1, SPATS2L, TYW5
rs2970610	667	7	1	0	3	0	0	2	2	0	1	ARTN, ATP6V0B, B4GALT2, CCDC24, CDC20, DPH2, ELOVL1, HYI, IPO13, KDM4A, KDM4A-AS1, MED8, MIR6079, MIR6734, MIR6735, MPL, PTPRF, SLC6A9, ST3GAL3, SZT2
rs312477	250	4	0	0	2	0	0	3	0	0	0	CACNA1D, DCP1A, TKT
rs324015	122	6	1	0	4	0	0	2	4	0	2	GPR182, MYO1A, NAB2, RDH16, STAT6, TAC3, TMEM194A, ZBTB39
rs34179565	220	0	0	0	0	0	0	0	0	0	0	AKAP6
rs34269918	348	9	0	0	2	0	0	1	1	0	0	RERE, SLC45A1
rs34719143	195	14	0	0	5	0	0	3	0	0	0	SATB2
rs34796896	365	3	1	1	1	0	0	0	0	1	0	DNAJC19, FXR1, LOC101928882, SOX2-OT
rs35346733	268	3	0	0	2	0	0	2	0	0	0	CNTN4
rs35604463	119	10	0	0	6	0	0	4	0	0	0	BCL11B
rs35736453	56	7	0	0	1	0	0	1	0	0	0	PTPRK
rs35774874	304	4	2	1	1	0	0	1	1	0	1	SNX19
rs36043959	605	2	0	0	0	0	0	0	0	0	0	none
rs36104021	171	4	0	0	0	0	0	0	0	0	0	ASCL1
rs3735025	170	1	0	0	1	0	0	1	1	0	1	DGKI, PTN
rs3743078	505	1	0	0	0	0	0	0	0	0	0	CHRNA3, CHRNA5, CHRNB4, HYKK, IREB2, PSMA4
rs4144797	395	13	2	2	9	1	1	4	1	0	0	C2orf82, GIGYF2, KCNJ13, NGEF
rs4240748	117	6	0	0	0	0	0	0	0	0	0	C12orf79
rs42945	340	33	0	0	5	0	0	1	5	0	1	CNOT1, NDRG4, SETD6, SLC38A7, SNORA46, SNORA76A
rs4470825	601	4	0	0	0	0	0	0	0	0	0	DOPEY1, ME1, PGM3, RWDD2A
rs4523180	70	3	0	0	0	0	0	0	0	0	0	LOC101928782
rs4648845	80	3	1	0	1	1	0	0	1	0	0	none
rs4650963	228	8	0	0	3	0	0	3	0	0	0	BRINP2
rs4766428	432	2	1	0	1	0	0	1	0	0	0	ANAPC7, ANKRD13A, ARPC3, ATP2A2, C12orf76, FAM216A, GIT2, GLTP, GPN3, HVCN1, IFT81, MIR4497, PPP1CC, PPTC7, RAD9B, TCHP, TCTN1, TRPV4, VPS29
rs4820386	120	7	1	0	1	1	0	1	0	0	0	CACNA1I
rs489939	519	1	0	0	1	0	0	1	0	0	0	LOC101243545, OTOL1
rs4925114	600	2	0	0	2	0	0	2	0	0	0	ATPAF2, DRG2, GID4, LRRC48, MIR33B, MIR6777, MYO15A, RAI1, SMCR5, SREBF1, TOM1L2
rs4936215	88	14	0	0	11	0	0	9	9	0	7	IGSF9B
rs4936277	58	12	1	0	0	0	0	0	0	0	0	none
rs4976967	199	8	0	0	2	0	0	2	0	0	0	TSNARE1
rs55669358	642	3	2	1	0	0	0	0	0	0	0	none
rs55672338	210	8	1	0	1	0	0	1	0	1	0	SOX2-OT
rs55770408	431	1	0	0	0	0	0	0	0	0	0	LOC440704
rs56145559	656	1	0	0	0	0	0	0	0	0	0	ALMS1, ALMS1-IT1, ALMS1P, C2orf78, DUSP11, EGR4, NAT8, NAT8B, STAMBP, TPRKB
rs56282503	50	6	0	0	4	0	0	2	4	0	2	ANKRD63, PAK6, PLCB2
rs56775891	56	8	0	0	0	0	0	0	0	0	0	none
rs56807175	80	5	0	0	0	0	0	0	0	0	0	none
rs5757730	171	5	0	0	4	0	0	2	2	0	1	ATF4, CACNA1I, MGAT3, MIEF1, RPS19BP1
rs5795787	177	1	0	0	1	0	0	1	0	0	0	OPCML
rs58033671	271	8	0	0	1	0	0	1	1	0	1	LINC00051, TSNARE1
rs5825114	159	8	0	0	4	0	0	3	0	0	0	LOC101927229
rs58950470	373	4	0	0	2	0	0	2	2	0	2	AP5B1, KAT5, MAP3K11, MIR4489, MIR4690, OVOL1, OVOL1-AS1, PCNXL3, RELA, RNASEH2C, SIPA1
rs6002655	638	5	0	0	2	0	0	0	2	0	0	CENPM, CYP2D6, CYP2D7P, FAM109B, LINC00634, LOC388906, LOC101929829, MIR33A, NAGA, NDUFA6, NDUFA6-AS1, SEPT3, SHISA8, SMDT1, SREBF2, TCF20, TNFRSF13C, WBP2NL
rs6035706	54	3	0	0	0	0	0	0	0	0	0	none
rs6065094	268	5	1	0	4	0	0	2	2	0	0	ACTR5, ARHGAP40, PPP1R16B, SLC32A1
rs61937595	177	2	1	0	0	0	0	0	0	0	0	INHBC, LRP1, MIR1228, NDUFA4L2, NXPH4, R3HDM2, SHMT2, STAC3
rs62334820	122	9	0	0	3	0	0	1	0	0	0	GPM6A
rs62606711	7	3	1	0	0	0	0	0	0	0	0	PJA1
rs634940	225	2	0	0	0	0	0	0	0	0	0	none
rs6434928	741	2	0	0	0	0	0	0	0	0	0	ANKRD44, ANKRD44-IT1, BOLL, COQ10B, HSPD1, HSPE1, HSPE1-MOB4, MARS2, MOB4, PLCL1, RFTN2, SF3B1
rs6678676	317	4	1	0	1	0	0	0	1	0	0	LINC00862, ZNF281
rs66791238	233	11	1	0	6	0	0	4	0	0	0	TCF4
rs6680011	196	1	0	0	0	0	0	0	0	0	0	FLJ31662
rs66885728	130	5	0	0	4	0	0	3	4	0	3	B9D1, EPN2, EPN2-AS1, EPN2-IT1, GRAP, GRAPL, LOC79999, LOC388436, MAPK7, MFAP4, MIR1180, RNF112, SLC5A10
rs6694545	164	8	0	0	0	0	0	0	0	0	0	LOC101929406
rs6701877	1187	0	0	0	0	0	0	0	0	0	0	ANKRD45, CACYBP, CENPL, DARS2, GAS5, GAS5-AS1, GPR52, KLHL20, LOC730159, MRPS14, RABGAP1L, RC3H1, SERPINC1, SLC9C2, SNORD44, SNORD47, SNORD74, SNORD75, SNORD76, SNORD77, SNORD78, SNORD79, SNORD80, SNORD81, ZBTB37
rs67439964	201	6	0	0	1	0	0	1	0	0	0	LINC00051, TSNARE1
rs6800435	134	12	0	0	1	0	0	1	0	0	0	LINC00606, SLC6A11
rs7010876	757	2	1	1	0	0	0	0	0	0	0	MMP16
rs704373	299	2	0	0	0	0	0	0	0	0	0	ATXN7, C3orf49, PSMD6, PSMD6-AS2, THOC7, THOC7-AS1
rs7099380	90	2	1	0	1	1	0	0	0	0	0	CACNB2
rs7129727	529	4	0	0	0	0	0	0	0	0	0	BTBD18, C11orf31, CLP1, CTNND1, MED19, MIR130A, SERPING1, TMX2, TMX2-CTNND1, YPEL4, ZDHHC5
rs7191183	301	1	0	0	0	0	0	0	0	0	0	GRIN2A
rs7216638	475	3	0	0	1	0	0	1	1	0	1	LOC101927839, SMG6, SRR
rs7225476	836	4	0	0	2	0	0	2	0	0	0	RPTOR
rs72342102	139	5	0	0	0	0	0	0	0	0	0	AIG1
rs72769124	114	3	0	0	0	0	0	0	0	0	0	none
rs72986630	11	1	1	1	0	0	0	0	0	0	0	ZNF440, ZNF441, ZNF491, ZNF823
rs7432375	1281	5	1	0	1	0	0	0	1	0	0	IL20RB, MSL2, NCK1, NCK1-AS1, PCCB, PPP2R3A, SLC35G2, STAG1
rs7476192	806	1	1	0	0	0	0	0	0	0	0	AS3MT, C10orf32, C10orf32-ASMT, CALHM1, CALHM2, CNNM2, INA, MIR1307, NT5C2, PCGF6, PDCD11, RPEL1, TAF5, USMG5
rs7499750	403	9	0	0	0	0	0	0	0	0	0	none
rs7508148	149	5	0	0	3	0	0	3	3	0	3	BCL2L12, IRF3, NOSIP, PRMT1, PRR12, PRRG2, RRAS, SCAF1
rs75575209	342	11	2	2	1	0	0	0	0	0	0	FANCL, VRK2
rs7596038	556	5	2	1	0	0	0	0	0	0	0	FANCL, VRK2
rs75968099	573	4	1	0	2	0	0	1	0	0	0	TRANK1
rs760608	124	1	0	0	1	0	0	1	0	0	0	none
rs7632921	336	5	0	0	4	0	0	2	0	0	0	FOXP1, MIR1284
rs76432012	29	4	1	0	0	0	0	0	0	0	0	FTCDNL1, LOC101927641
rs77011057	161	13	2	1	0	0	0	0	0	0	0	FANCL, VRK2
rs7701440	752	5	3	2	1	1	0	0	0	0	0	CTC-436P18.1, DEPDC1B, ELOVL7, ERCC8, NDUFAF2, SMIM15, ZSWIM6
rs77853293	1227	390	9	0	8	0	0	5	0	0	0	EMB
rs7789569	509	4	1	1	2	0	0	2	0	0	0	KMT2E, KMT2E-AS1, LHFPL3, LHFPL3-AS2, LINC01004, SRPK2
rs7801375	164	3	1	1	1	0	0	0	0	0	0	LOC101928782
rs783540	415	6	3	3	0	0	0	0	0	0	0	ADAMTS7P1, AP3B2, CPEB1, EFTUD1, FAM154B, FSD2, GOLGA6L9, GOLGA6L10, GOLGA6L17P, HOMER2, LOC80154, LOC283692, LOC283693, LOC338963, LOC727751, LOC102724034, RPS17, SCARNA15, SNHG21, UBE2Q2P2, WHAMM
rs7893279	283	12	0	0	2	0	0	1	2	0	1	ARL5B, CACNB2, NSUN6
rs79212538	150	7	0	0	3	0	0	2	0	0	0	CTB-12O2.1, LOC101927134, NMUR2
rs7951870	670	6	0	0	3	0	0	1	3	0	1	ACP2, AMBRA1, ARFGAP2, ARHGAP1, ATG13, C11orf49, CHRM4, CKAP5, CREB3L1, DDB2, DGKZ, F2, HARBI1, LRP4, LRP4-AS1, MADD, MDK, MIR3160-1, MIR3160-2, MIR4688, MIR5582, MIR6745, MYBPC3, NR1H3, PACSIN3, SNORD67, ZNF408
rs79926379	182	9	1	1	5	0	0	2	0	0	0	LOC101927229, LOC101927273, MIR4529, TCF4
rs80020004	203	3	0	0	0	0	0	0	0	0	0	APOPT1, BAG5, C14orf2, CKB, EIF5, KLC1, LINC00637, MARK3, PPP1R13B, RD3L, SNORA28, TDRD9, TRMT61A, XRCC3, ZFYVE21
rs893949	69	3	1	0	1	1	0	1	1	0	1	none
rs9545047	526	1	0	0	1	0	0	1	0	0	0	NDFIP2, NDFIP2-AS1, RBM26, RBM26-AS1
rs9607782	1113	10	1	0	1	0	0	0	0	0	0	ACO2, C22orf46, CCDC134, CENPM, CHADL, CSDC2, DESI1, DNAJB7, EP300, EP300-AS1, L3MBTL2, LINC00634, MCHR1, MEI1, MIR33A, MIR1281, MIR4766, MIR6889, MKL1, NHP2L1, PHF5A, PMM1, POLR3H, RANGAP1, RBX1, SEPT3, SHISA8, SLC25A17, SREBF2, ST13, TEF, TNFRSF13C, TOB2, XPNPEP3, XRCC6, ZC3H7B
rs9611177	218	5	1	0	1	0	0	1	1	0	1	MGAT3
rs9881798	419	2	0	0	2	0	0	2	0	0	0	MIR3714, PLCL2
