# Supplementary material for: Leveraging mouse chromatin data for heritability enrichment informs common disease architecture and reveals cortical layer contributions to schizophrenia
Source: HighWire-hosted journal article supplement (doi:10.1101/gr.256578.119), 2020-04-01
Supplement: Supplemental_Table_S15.xlsx [file Supplemental_Table_S15.xlsx]

## Sheet: README
Supplemental Table S15. Summary of VISTA enhancer browser overlap with SNPs with a PIP > 0.1 and overlap with a SCZ enriched population. Contained within is the name of the SNP (“rsid”), the lead SNP (“lead.snp”), the VISTA element coordinates (“vista.chr”,”vista.start”, “vista.end”), the VISTA element name (“vista.element”), and the nearest genes as designated by VISTA (“vista.nearest.genes”).

## Sheet: Supplemental Table S15
rsid	lead.snp	vista.chr	vista.start	vista.end	vista.element	vista.nearest.genes
rs1805203	rs55672338	chr3	180773639	180775802	hs192	DNAJC19,SOX2
rs1805645	rs34796896	chr3	180773639	180775802	hs192	DNAJC19,SOX2
