# Supplementary material for: Leveraging mouse chromatin data for heritability enrichment informs common disease architecture and reveals cortical layer contributions to schizophrenia
Source: HighWire-hosted journal article supplement (doi:10.1101/gr.256578.119), 2020-04-01
Supplement: Supplemental_Table_S16.xlsx [file Supplemental_Table_S16.xlsx]

## Sheet: README
Supplemental Table S16. A summary of LDSC file downloads. Includes file’s purpose (“LDSC files downloaded”) and the download link (“URL”).

## Sheet: Supplemental Table S16
LDSC files downloaded	URL
Baseline	https://data.broadinstitute.org/alkesgroup/LDSCORE/1000G_Phase3_baseline_v1.1_ldscores.tgz
PLINK	https://data.broadinstitute.org/alkesgroup/LDSCORE/1000G_Phase3_plinkfiles.tgz
Freq	https://data.broadinstitute.org/alkesgroup/LDSCORE/1000G_Phase3_frq.tgz
Weights	https://data.broadinstitute.org/alkesgroup/LDSCORE/1000G_Phase3_weights_hm3_no_MHC.tgz
snplist	https://data.broadinstitute.org/alkesgroup/LDSCORE/w_hm3.snplist.bz2
Roadmap control for ATAC	https://data.broadinstitute.org/alkesgroup/LDSCORE/LDSC_SEG_ldscores/Corces_ATAC_1000Gv3_ldscores.tgz
