# Supplementary material for: Leveraging mouse chromatin data for heritability enrichment informs common disease architecture and reveals cortical layer contributions to schizophrenia
Source: HighWire-hosted journal article supplement (doi:10.1101/gr.256578.119), 2020-04-01
Supplement: Supplemental_Table_S17.xlsx [file Supplemental_Table_S17.xlsx]

## Sheet: README
Supplemental Table S17. A summary of the SNPs used to extract proxy SNPs for schizophrenia loci. This includes chromosome (“chromosome”), start and end of locus (“start” and “end”), the lead SNP for the locus (“lead.snp”), the SNP used to extract proxy SNPs (“search.snp”), and any notes about the search SNP (“notes”).

## Sheet: Supplemental Table S17
chromosome	start	end	lead.snp	search.snp	notes
chr1	173479023	175000887	rs6701877	rs6701877	.
chr1	149998923	151115887	rs140505938	rs140505938	.
chr1	73264393	74115945	rs12129573	rs12129573	.
chr1	43793214	44480093	rs2970610	rs2970610	.
chr1	190757036	191408693	rs28374258	rs28374258	.
chr1	98036832	98651527	rs2660304	rs2660304	.
chr1	8352642	8838528	rs34269918	rs34269918	.
chr1	243203672	243627135	rs10803138	rs10803138	.
chr1	243614180	244025999	rs14403	rs14403	.
chr1	66205718	66552709	rs12129719	rs12129719	.
chr1	177170720	177428790	rs4650963	rs4650963	.
chr1	95746349	95944432	rs6680011	rs6680011	.
chr1	200250436	200421466	rs6678676	rs6678676	.
chr1	97731961	97885249	rs11165867	rs11165867	.
chr1	190585303	190719743	rs55770408	rs55770408	.
chr1	239166610	239298749	rs72769124	rs72769124	.
chr1	30411185	30516776	rs6694545	rs6694545	.
chr1	2368232	2402499	rs4648845	rs4648845	.
chr2	198144002	198954774	rs6434928	rs6434928	.
chr2	200536068	201309547	rs2949006	rs2949006	.
chr2	185405580	186057716	rs10196799	rs10196799	.
chr2	57895438	58502679	rs75575209	rs75575209	.
chr2	73511262	74101954	rs56145559	rs56145559	.
chr2	57941185	58500141	rs7596038	rs7596038	.
chr2	199776050	200305460	rs1451488	rs1451488	.
chr2	57950104	58450569	rs77011057	rs77011057	.
chr2	199921578	200332499	rs34719143	rs34719143	.
chr2	22499207	22822159	rs12712510	rs12712510	.
chr2	233550961	233814878	rs4144797	rs4144797	.
chr2	200387210	200632032	rs76432012	rs76432012	.
chr2	201113452	201333001	rs1347692	rs1347692	.
chr2	225308978	225469611	rs11685299	rs11685299	.
chr2	145120947	145214607	rs12991836	rs12991836	.
chr2	146363633	146441828	rs56807175	rs56807175	.
chr2	73129974	73168593	rs2077586	rs2077586	.
chr2	200768453	200768453	rs200626410	rs200626410	.
chr3	135669219	136752653	rs7432375	rs7432375	.
chr3	52217088	53281183	rs1080500	rs1080500	.
chr3	180524764	181245320	rs34796896	rs34796896	.
chr3	17219137	17888256	rs11409090	rs11409090	.
chr3	180860434	181256285	rs55672338	rs55672338	.
chr3	161146130	161520740	rs489939	rs489939	.
chr3	16747942	17119238	rs9881798	rs9881798	.
chr3	63715318	64005452	rs704373	rs704373	.
chr3	53273192	53539241	rs312477	rs312477	.
chr3	71481192	71679664	rs7632921	rs7632921	.
chr3	2428745	2582549	rs35346733	rs35346733	.
chr3	36834099	36964583	rs75968099	rs75968099	.
chr3	10793110	10872262	rs6800435	rs6800435	.
chr3	60277174	60303504	rs1353545	rs1353545	.
chr4	102547366	103388441	rs13107325	rs13107325	.
chr4	170198392	170647421	rs10520163	rs10520163	.
chr4	143629150	143924146	rs13121251	rs13121251	.
chr4	176795426	176973267	rs62334820	rs62334820	.
chr4	23334811	23443552	rs215411	rs215411	.
chr4	176717618	176756594	rs12498839	rs12498839	.
chr5	44642670	46405055	rs16902086	rs16902086	.
chr5	87407727	88871993	rs16867576	rs16867576	.
chr5	86909526	88224419	rs254782	rs254782	.
chr5	151437972	152654479	rs79212538	rs79212538	.
chr5	59911693	60847272	rs7701440	rs7701440	.
chr5	137450345	137948140	rs13169274	rs13169274	.
chr5	151887779	152360494	rs111294930	rs111294930	.
chr5	49441779	49884022	rs77853293	rs9686162	.	rs77853293 was merged into rs9686162 according to dbSNP so rs9686162 was used
chr5	152505453	152785000	rs2910032	rs2910032	.
chr5	152744817	152899532	rs12522290	rs12522290	.
chr6	83967454	84414411	rs217287	rs217287	.
chr6	83789798	84092546	rs4470825	rs4470825	.
chr6	114612973	114775668	rs760608	rs760608	.
chr6	93044855	93177270	rs634940	rs634940	.
chr6	73058954	73172294	rs1339227	rs1339227	.
chr6	143629340	143714330	rs72342102	rs9403484	.	rs72342102 was withdrawn as a SNP, however rs142387624 seemed to have a roughly equivalent deletion with a similar allele frequency in the same genomic location. rs142387624 returned no proxy SNPs so a SNP in perfect LD was used (rs9403484; R2=1 in EUR population via Ldlink)
chr6	128301981	128334236	rs35736453	rs13197257	.	rs35736453 originally returned no proxies, so a SNP in perfect LD was used (rs13197257; R2 = 1 in EUR population via LDlink)
chr7	85575489	87275389	rs147922658	rs147922658	.
chr7	85924492	86580674	rs12704290	rs12704290	.
chr7	104471787	105064593	rs7789569	rs7789569	.
chr7	110737149	111236477	rs12705761	rs12705761	.
chr7	1851205	2343621	rs10650434	rs10650434	.
chr7	109946567	110245369	rs211829	rs211829	.
chr7	24557497	24844736	rs146678232	rs78849264	.	rs146678232 originally returned no proxies, so a SNP known to be within high LD was used (rs78849264; R2 = 0.953 in EUR population via LDlink)
chr7	131533769	131619847	rs7801375	rs7801375	.
chr7	137010589	137093743	rs3735025	rs3735025	.
chr7	131619693	131627573	rs4523180	rs4523180	.
chr8	8092025	10283602	rs11993663	rs11993663	.
chr8	33604120	34674539	rs55669358	rs55669358	.
chr8	60475926	61117903	rs1473594	rs1473594	.
chr8	89188046	89761163	rs7010876	rs7010876	.
chr8	111460027	112015011	rs36043959	rs36043959	.
chr8	38014429	38316849	rs10156310	rs10156310	.
chr8	26119170	26279173	rs1042992	rs1042992	.
chr8	27319905	27470778	rs11783093	rs11783093	.
chr8	143267760	143413334	rs67439964	rs67439964	.
chr8	27186652	27330813	rs2565065	rs2565065	.
chr8	143267749	143410423	rs58033671	rs13262595	.	rs58033671 originally returned no proxies, so a SNP known to be within high LD was used (rs13262595; R2 = 0.9603 in EUR population via LDlink)
chr8	143293307	143404118	rs4976967	rs4976967	.
chr8	18388177	18458140	rs2410572	rs2410572	.
chr8	4177231	4210746	rs139425113	rs139425113	.
chr9	84498152	85129970	rs1319017	rs1319017	.
chr9	100991430	101079033	rs10985817	rs10985817	.
chr10	104229588	105274900	rs12416331	rs12416331	.
chr10	104613089	105218254	rs7476192	rs7476192	.
chr10	18601928	18968668	rs7893279	rs7893279	.
chr10	18538669	18574980	rs7099380	rs7099380	.
chr11	46227161	47371598	rs7951870	rs7951870	.
chr11	57369008	57735431	rs7129727	rs7129727	.
chr11	24264778	24533962	rs1899543	rs1899543	.
chr11	30183742	30437981	rs1765142	rs1765142	.
chr11	65378028	65577846	rs58950470	rs58950470	.
chr11	130706918	130894699	rs35774874	rs35774874	.
chr11	113299829	113448762	rs2514218	rs2514218	.
chr11	132506523	132581442	rs2917569	rs2917569	.
chr11	124583878	124653926	rs12293670	rs12293670	.
chr11	133792743	133853694	rs4936215	rs4936215	.
chr11	132387460	132417766	rs5795787	rs5795787	.
chr11	113431960	113451229	rs4936277	rs4936277	.
chr11	134282729	134297345	rs893949	rs893949	.
chr12	110265586	111275317	rs4766428	rs4766428	.
chr12	123310521	123927262	rs2851447	rs2851447	.
chr12	39414371	39964006	rs10783624	rs10783624	.
chr12	23214508	23642695	rs1120004	rs1120004	.
chr12	57569478	57836098	rs61937595	rs61937595	.
chr12	57331741	57519694	rs324015	rs324015	.
chr12	2285731	2440464	rs2007044	rs2007044	.
chr12	92243186	92395053	rs4240748	rs4240748	.
chr12	2456062	2523772	rs12823424	rs12823424	.
chr12	103347511	103390444	rs36104021	rs36104021	.
chr13	79855297	80192906	rs9545047	rs9545047	.
chr14	103793539	104511206	rs80020004	rs80020004	.
chr14	103849715	104537680	rs10083370	rs10083370	.
chr14	59585932	60088992	rs150437760	rs150437760	.
chr14	29275791	29594625	rs10148671	rs10148671	.
chr14	29999987	30300361	rs1191551	rs1191551	.
chr14	30105291	30190833	rs199687649	rs199687649	.
chr14	72382471	72467631	rs2332700	rs2332700	.
chr14	99657227	99735480	rs35604463	rs35604463	.
chr14	33257891	33309495	rs34179565	rs34179565	.
chr15	82426170	83575025	rs783540	rs783540	.
chr15	84608488	85392298	rs12908161	rs12908161	.
chr15	78711803	79021464	rs3743078	rs3743078	.
chr15	47524423	47751837	rs281299	rs281299	.
chr15	61813790	61909712	rs12898315	rs12898315	.
chr15	40550149	40599296	rs56282503	rs56282503	.
chr15	91402803	91437388	rs17514846	rs17514846	.
chr15	70573650	70603159	rs12148337	rs12148337	.
chr16	67841129	68419298	rs1975802	rs1975802	.
chr16	71003590	71575281	rs2161711	rs2161711	.
chr16	29923510	30177807	rs11646127	rs11646127	.
chr16	63547390	63776400	rs17465671	rs17465671	.
chr16	58538662	58734713	rs42945	rs42945	.
chr16	9875513	9970227	rs7191183	rs7191183	.
chr16	13673040	13763411	rs7499750	rs7499750	.
chr16	7744180	7761736	rs12447542	rs12447542	.
chr16	24235580	24249959	rs198160	rs198160	.
chr17	18917237	19322062	rs66885728	rs2098497	rs66885728 was merged into rs2098497 according to dbSNP so rs2098497 was used
chr17	17649172	18035019	rs4925114	rs4925114	.
chr17	78456708	78704618	rs7225476	rs7225476	.
chr17	2017029	2220814	rs7216638	rs7216638	.
chr18	52704850	53601811	rs79926379	rs79926379	.
chr18	53022896	53630222	rs144158419	rs144158419	.
chr18	53183396	53477819	rs28758902	rs28758902	.
chr18	52716306	52827668	rs5825114	rs4801131	rs5825114 originally returned no proxies, so a SNP in perfect LD was used (rs4801131; R2 = 1 in EUR population via LDlink)
chr18	53768975	53804156	rs1789595	rs1789595	.
chr18	77563334	77580712	rs56775891	rs56775891	.
chr18	53230650	53230650	rs66791238	rs66791238	.
chr19	19331847	19800987	rs2905432	rs2905432	.
chr19	50067508	50182697	rs7508148	rs7508148	.
chr19	11849736	11943697	rs72986630	rs72986630	.
chr19	30981639	31052274	rs2053079	rs2053079	.
chr20	37277618	37512698	rs6065094	rs6065094	.
chr20	20814132	20843441	rs6035706	rs6035706	.
chr22	41027819	42386534	rs9607782	rs9607782	.
chr22	42225018	42689370	rs6002655	rs6002655	.
chr22	39866938	40058186	rs5757730	rs5757730	.
chr22	40043812	40091818	rs4820386	rs4820386	.
chr22	39838892	39856356	rs9611177	rs9611177	.
chrX	5859733	6029533	rs12009217	rs12009217	.
chrX	68377126	68377205	rs62606711	rs62606711	.
