# Supplementary material for: Leveraging mouse chromatin data for heritability enrichment informs common disease architecture and reveals cortical layer contributions to schizophrenia
Source: HighWire-hosted journal article supplement (doi:10.1101/gr.256578.119), 2020-04-01
Supplement: Supplemental_Table_S18.xlsx [file Supplemental_Table_S18.xlsx]

## Sheet: README
Supplemental Table S18. A summary of the number of SNPs in each schizophrenia locus throughout the process of creating files to be fine-mapped by PAINTOR. This includes the lead SNP (“index.snp”), the total number of proxies extracted (“all.proxies”) and the total number of proxies after merging with summary statistics (“snps.after.merge”), and the total number of SNPs remaining after LD calculat…

## Sheet: Supplemental Table S18
index.snp	all.proxies	snps.after.merge	snps.after.ld
rs10083370	652	579	501
rs10148671	321	265	224
rs10156310	285	236	199
rs10196799	490	452	372
rs1042992	76	72	64
rs10520163	505	447	386
rs10650434	949	859	740
rs10783624	607	548	465
rs10803138	468	363	314
rs1080500	1075	953	808
rs10985817	178	164	147
rs111294930	1454	1303	1114
rs11165867	288	263	221
rs1120004	442	382	333
rs11409090	769	690	586
rs11646127	383	329	280
rs11685299	372	337	290
rs11783093	176	162	139
rs1191551	241	211	189
rs11993663	1609	1467	1180
rs12009217	372	123	105
rs12129573	1496	1348	1158
rs12129719	451	420	356
rs12148337	250	231	198
rs12293670	127	116	102
rs12416331	587	497	435
rs12447542	43	39	33
rs12498839	64	57	51
rs12522290	277	259	206
rs12704290	472	417	355
rs12705761	494	442	382
rs12712510	473	431	376
rs12823424	85	80	73
rs12898315	237	222	195
rs12908161	772	648	559
rs12991836	64	55	45
rs13107325	157	142	122
rs13121251	1048	945	795
rs13169274	236	208	187
rs1319017	345	302	266
rs1339227	314	298	255
rs1347692	200	179	156
rs1353545	108	103	82
rs139425113	239	226	164
rs140505938	823	730	630
rs14403	392	359	313
rs144158419	293	270	226
rs1451488	614	558	480
rs146678232	742	675	577
rs1473594	966	885	756
rs147922658	287	252	219
rs150437760	507	457	403
rs16867576	65	62	54
rs16902086	2160	1919	1611
rs17465671	338	299	248
rs17514846	82	75	61
rs1765142	614	559	483
rs1789595	51	46	36
rs1899543	438	389	333
rs1975802	1122	1014	874
rs198160	68	61	48
rs199687649	223	190	170
rs200626410	334	291	246
rs2007044	156	144	126
rs2053079	169	159	145
rs2077586	30	26	21
rs211829	391	347	297
rs215411	350	318	274
rs2161711	312	266	233
rs217287	679	591	488
rs2332700	231	203	180
rs2410572	290	269	219
rs2514218	182	174	149
rs254782	316	285	230
rs2565065	233	224	195
rs2660304	635	602	495
rs281299	391	366	315
rs28374258	626	563	480
rs2851447	805	692	601
rs28758902	324	294	252
rs2905432	647	565	490
rs2910032	431	396	323
rs2917569	121	104	97
rs2949006	586	512	443
rs2970610	757	667	580
rs312477	289	250	214
rs324015	140	122	99
rs34179565	253	220	179
rs34269918	404	348	296
rs34719143	212	195	174
rs34796896	424	365	300
rs35346733	288	268	228
rs35604463	127	119	102
rs35736453	65	56	53
rs35774874	336	304	268
rs36043959	661	605	523
rs36104021	177	171	137
rs3735025	187	170	141
rs3743078	570	505	433
rs4144797	460	395	347
rs4240748	127	117	100
rs42945	390	340	296
rs4470825	653	601	516
rs4523180	73	70	58
rs4648845	92	80	72
rs4650963	249	228	199
rs4766428	483	432	366
rs4820386	130	120	112
rs489939	572	519	441
rs4925114	674	600	516
rs4936215	89	88	75
rs4936277	61	58	51
rs4976967	253	199	184
rs55669358	718	642	552
rs55672338	243	210	177
rs55770408	476	431	357
rs56145559	775	656	553
rs56282503	52	50	45
rs56775891	66	56	44
rs56807175	90	80	68
rs5757730	200	171	153
rs5795787	186	177	149
rs58033671	342	271	247
rs5825114	172	159	133
rs58950470	419	373	325
rs6002655	758	638	538
rs6035706	58	54	49
rs6065094	305	268	232
rs61937595	204	177	151
rs62334820	138	122	103
rs62606711	40	7	7
rs634940	254	225	188
rs6434928	860	741	627
rs6678676	371	317	274
rs66791238	259	233	197
rs6680011	217	196	164
rs66885728	167	130	111
rs6694545	178	164	143
rs6701877	1401	1187	1004
rs67439964	225	201	186
rs6800435	144	134	114
rs7010876	829	757	642
rs704373	331	299	256
rs7099380	102	90	72
rs7129727	602	529	455
rs7191183	324	301	259
rs7216638	553	475	410
rs7225476	945	836	734
rs72342102	152	139	120
rs72769124	120	114	97
rs72986630	22	11	9
rs7432375	1508	1281	1097
rs7476192	913	806	685
rs7499750	431	403	332
rs7508148	165	149	120
rs75575209	374	342	285
rs7596038	622	556	452
rs75968099	648	573	501
rs760608	145	124	113
rs7632921	376	336	297
rs76432012	33	29	26
rs77011057	182	161	131
rs7701440	859	752	648
rs77853293	1623	1227	1029
rs7789569	595	509	431
rs7801375	176	164	139
rs783540	514	415	358
rs7893279	337	283	238
rs79212538	165	150	124
rs7951870	763	670	585
rs79926379	198	182	165
rs80020004	230	203	182
rs893949	75	69	66
rs9545047	592	526	455
rs9607782	1277	1113	953
rs9611177	247	218	186
rs9881798	452	419	359
